# Supplementary material for: How methane emission from rice paddy is affected by management practices and region?
Source: Copernicus journal article supplement (doi:10.5194/acp-2018-165), 2018-04-04
Supplement: Supplementary file 1 [file Data Set 1.xlsx]

## Sheet: database
Location	country	OC%	pH	season	Pre-season water	Water regime	Organicamendment	ammount of organic, t/ha	CH4 flux (mg/m2/h)	Seasonal emission, g/m2	Reference	Cropping period	Measurement period
Ahmedabad, Gujarat	India	0.4	7.6	1992.8-1992.11	Unknown	CF	no	0	6.17284	12	Gupta et al., 1994	90	81
IARI, New Delhi	India	0.41	8.2	1993.7-1993-10	long	CF	FYM	8	2.06	4.944	Debnath et al., 1996		100
IARI, New Delhi	India	0.45	8.2	July-October	long	MD	no	0	0.65125	1.563	Mitra et al., 1999		100
IARI, New Delhi	India	0.45	8.2	July-October	long	MD	no	0	1.09625	2.631	Mitra et al., 1999		100
IARI, New Delhi	India	0.45	8.2	July-October	long	MD	no	0	1.00083	2.402	Mitra et al., 1999		100
IARI, New Delhi	India	0.45	8.2	July-October	long	MD	no	0	1.12375	2.697	Mitra et al., 1999		100
IARI, New Delhi	India	0.45	8.2	July-October	long	MD	no	0	0.704583	1.691	Mitra et al., 1999		100
IARI, New Delhi	India	0.45	8.2	July-October	long	MD	no	0	1.135	2.724	Mitra et al., 1999		100
IARI, New Delhi	India	0.45	8.2	1994.4-1994.10	long	CF	no	0	1.65833	3.98	Jain et al., 2000		100
IARI, New Delhi	India	0.45	8.2	1994.4-1994.10	long	CF	no	0	1.45	3.48	Jain et al., 2000		100
IARI, New Delhi	India	0.45	8.2	1995.4-1995.10	long	CF	no	0	1.00488	2.267	Jain et al., 2000		94
IARI, New Delhi	India	0.45	8.2	1996.4-1996.10	long	CF	no	0	0.833333	2.3	Jain et al., 2000		115
IARI, New Delhi	India	0.41	8.2	1997.4-1997.10	long	CF	no	0	0.657937	1.658	Jain et al., 2000		105
IARI, New Delhi	India	0.41	8.2	1994.4-1994.10	long	MD	no	0	1.35	3.24	Jain et al., 2000		100
IARI, New Delhi	India	0.41	8.2	1994.4-1994.10	long	MD	no	0	1.25	3	Jain et al., 2000		100
IARI, New Delhi	India	0.41	8.2	1995.4-1995.10	long	MD	no	0	0.430408	0.971	Jain et al., 2000		94
IARI, New Delhi	India	0.41	8.2	1995.4-1995.10	long	MD	no	0	0.552748	1.247	Jain et al., 2000		94
IARI, New Delhi	India	0.41	8.2	1995.4-1995.10	long	MD	no	0	0.595745	1.344	Jain et al., 2000		94
IARI, New Delhi	India	0.41	8.2	1996.4-1996.10	long	MD	no	0	0.648551	1.79	Jain et al., 2000		115
IARI, New Delhi	India	0.41	8.2	1997.4-1997.10	long	MD	no	0	0.513095	1.293	Jain et al., 2000		105
IARI, New Delhi	India	0.45	7.6	1999.6-9	long	CF	no	0	0.972222	2.45	Ghosh et al., 2003		105
IARI, New Delhi	India	0.45	7.6	1999.6-9	long	CF	no	0	1.48016	3.73	Ghosh et al., 2003		105
IARI, New Delhi	India	0.45	7.6	1999.6-9	long	CF	no	0	1.30952	3.3	Ghosh et al., 2003		105
IARI, New Delhi	India	0.45	7.6	1999.6-9	long	CF	no	0	1.11508	2.81	Ghosh et al., 2003		105
IARI, New Delhi	India	0.45	7.6	1999.6-9	long	CF	no	0	1.15079	2.9	Ghosh et al., 2003		105
IARI, New Delhi	India	0.45	7.6	1999.6-9	long	CF	no	0	1.13889	2.87	Ghosh et al., 2003		105
IARI, New Delhi	India	0.45	7.6	1999.6-9	long	CF	no	0	1.04762	2.64	Ghosh et al., 2003		105
IARI, New Delhi	India	0.45	8.1	1999.7-10	long	CF	no	0	1.31554	2.81	Pathak et al., 2003		89
IARI, New Delhi	India	0.45	8.1	1999.7-10	long	CF	FYM	6	2.12547	4.54	Pathak et al., 2003		89
IARI, New Delhi	India	0.45	8.1	1999.7-10	long	CF	no	0	0.945693	2.02	Pathak et al., 2003		89
IARI, New Delhi	India	0.45	8.1	1999.7-10	long	CF	no	0	1.13764	2.43	Pathak et al., 2003		89
IARI, New Delhi	India	0.45	8.1	1999.7-10	long	MD	no	0	0.683521	1.46	Pathak et al., 2003		89
IARI, New Delhi	India	0.45	8.1	1999.7-10	long	MD	FYM	6	1.29682	2.77	Pathak et al., 2003		89
IARI, New Delhi	India	0.45	8.1	1999.7-10	long	MD	no	0	0.449438	0.96	Pathak et al., 2003		89
IARI, New Delhi	India	0.45	8.1	1999.7-10	long	MD	no	0	0.388577	0.83	Pathak et al., 2003		89
Varanasi	India	0.72	8.2	1993.7-1993.11	long	CF	no	0	2.79	7.23168	Singh et al, 1996		108
Varanasi	India	0.72	8.2	1993.7-1993.11	long	CF	no	0	4.39	11.3789	Singh et al, 1996		108
Varanasi	India	0.72	8.2	1993.7-1993.11	long	CF	straw_on_season	10	5.26	13.6339	Singh et al, 1996		108
Varanasi	India	0.72	8.2	1994.7-1994.11	long	CF	no	0	6.4	15.36	Singh et al, 1996		100
Varanasi	India	0.72	8.2	1994.7-1994.11	long	CF	no	0	8.4	20.16	Singh et al, 1996		100
Varanasi	India	0.72	8.2	1994.7-1994.11	long	CF	straw_on_season	10	10.4	24.96	Singh et al, 1996		100
Varanasi	India	0.72	8.2	1995.7-1995.11	long	CF	FYM	1	6.80435	18.78	Singh et al., 1999		115
Varanasi	India	0.72	8.2	1995.7-1995.11	long	CF	FYM	1	8.23913	22.74	Singh et al., 1999		115
Varanasi	India	0.72	8.2	1995.7-1995.11	long	CF	FYM	1	5.37681	14.84	Singh et al., 1999		115
Varanasi	India	0.72	8.2	1995.7-1995.11	long	CF	FYM	1	7.58333	20.93	Singh et al., 1999		115
Varanasi	India	0.72	8.2	1995.7-1995.11	long	CF	FYM	1	5.59058	15.43	Singh et al., 1999		115
Varanasi	India	0.72	8.2	1995.7-1995.11	long	CF	FYM	1	9.46377	26.12	Singh et al., 1999		115
Cuttack, Orissa	India	0.76	6.2	1991.6-1991.9	Unknown	CF	no	0	11	30.096	Adhya et al., 1994	114	61
Cuttack, Orissa	India	0.76	6.2	1991.6-1991.9	Unknown	CF	no	0	17	44.88	Adhya et al., 1994	110	61
Cuttack, Orissa	India	0.76	6.2	1991.6-1991.9	Unknown	CF	no	0	8.6	18.576	Adhya et al., 1994	90	64
Cuttack, Orissa	India	0.76	6.4	1994.6-1994.11	Unknown	CF	no	0	10.4486	20.0613	Satpathy et al., 1998	120	80
Cuttack, Orissa	India	0.76	6.4	1994.6-1994.11	Unknown	CF	no	0	6.92571	13.2974	Satpathy et al., 1998	100	80
Cuttack, Orissa	India	0.76	6.4	1994.6-1994.11	Unknown	CF	no	0	10.3471	19.8665	Satpathy et al., 1998	110	80
Cuttack, Orissa	India	0.76	6.4	1994.6-1994.11	Unknown	CF	no	0	8.21714	15.7769	Satpathy et al., 1998	120	80
Cuttack, Orissa	India	0.76	6.4	1994.6-1994.11	Unknown	CF	no	0	5.06143	9.71794	Satpathy et al., 1998	110	80
Cuttack, Orissa	India	0.76	6.4	1994.6-1994.11	Unknown	CF	no	0	10.7629	20.6647	Satpathy et al., 1998	115	80
Cuttack, Orissa	India	0.76	6.4	1994.6-1994.11	Unknown	CF	no	0	3.19571	6.13577	Satpathy et al., 1998	110	80
Cuttack, Orissa	India	0.76	6.4	1994.6-1994.11	Unknown	CF	no	0	3.26286	6.26469	Satpathy et al., 1998	120	80
Cuttack, Orissa	India	0.76	6.4	1994.6-1994.11	Unknown	CF	no	0	6.16429	11.8354	Satpathy et al., 1998	130	80
Cuttack, Orissa	India	0.76	6.4	1994.6-1994.11	Unknown	CF	no	0	6.50714	12.4937	Satpathy et al., 1998	115	80
Cuttack, Orissa	India	0.9	6.2	1994.6-1994.11	Unknown	CF	no	0	13.16	23.688	Adhya et al., 1998		75
Cuttack, Orissa	India	0.41	6.1	1997.1-1997.5	Unknown	CF	no	0	7.18889	15.528	Bharati et al., 2000		90
Cuttack, Orissa	India	0.41	6.1	1997.1-1997.5	Unknown	CF	no	0	4.39537	9.494	Bharati et al., 2000		90
Cuttack, Orissa	India	0.86	6.16	1997 dry (2-5)	short	CF	no	0	0.68	1.861	Adhya et al., 2000b	106
Cuttack, Orissa	India	0.86	6.16	1997 dry (2-5)	short	CF	straw_on_season	2	1.32208	3.618	Adhya et al., 2000b	106
Cuttack, Orissa	India	0.86	6.16	1998 dry (2-5)	long	CF	no	0	1.71208	3.615	Adhya et al., 2000b	96
Cuttack, Orissa	India	0.86	6.16	1998 dry (2-5)	long	CF	no	0	3.31917	7.01	Adhya et al., 2000b	96
Cuttack, Orissa	India	0.86	6.16	1998 dry (2-5)	long	CF	no	0	3.63833	7.684	Adhya et al., 2000b	96
Cuttack, Orissa	India	0.86	6.16	1998 dry (2-5)	long	CF	no	0	2.87417	6.069	Adhya et al., 2000b	96
Cuttack, Orissa	India	0.86	6.16	1997 dry (2-5)	short	MD	no	0	0.575	1.573	Adhya et al., 2000b	106
Cuttack, Orissa	India	0.86	6.16	1997 dry (2-5)	short	MD	straw_on_season	2	0.991667	2.714	Adhya et al., 2000b	106
Cuttack, Orissa	India	0.86	6.16	1995 wet (7-11)	Unknown	RFW	no	0	0.98	2.584	Adhya et al., 2000b	110
Cuttack, Orissa	India	0.86	6.16	1995 wet (7-11)	Unknown	RFW	no	0	0.82875	2.258	Adhya et al., 2000b	126
Cuttack, Orissa	India	0.86	6.16	1995 wet (7-11)	Unknown	RFW	no	0	0.74375	2.021	Adhya et al., 2000b	110
Cuttack, Orissa	India	0.86	6.16	1995 wet (7-11)	Unknown	RFW	no	0	1.64917	4.441	Adhya et al., 2000b	110
Cuttack, Orissa	India	0.86	6.16	1996 wet (7-10)	long	RFW	no	0	1.70833	4.23	Adhya et al., 2000b	104
Cuttack, Orissa	India	0.9	6.2	1997.7-1997.12	long	CF	no	0	3.4	7.344	Adhy et al., 2000a		90
Cuttack, Orissa	India	0.9	6.2	1997.2-1997.5	short	CF	no	0	4.62	9.9792	Adhy et al., 2000a		90
Cuttack, Orissa	India	0.9	6.2	1997.7-1997.12	short	CF	no	0	6.1	13.176	Adhy et al., 2000a		90
CRRI, Cuttack	India	1.61	6.2	1997.1-5	long	CF	no	0	2.64444	6.664	Mohanty et al., 2001		105
CRRI, Cuttack	India	1.61	6.2	1997.1-5	long	CF	no	0	2.12302	5.35	Mohanty et al., 2001		105
AAU,Jorhat, Assam	India	0.348028	5.2	1997, kharif	Unknown	Unknown	no	0	1.28	3.072	Barman et al., 2000	110
AAU,Jorhat, Assam	India	0.400232	5.2	1997, kharif	Unknown	Unknown	no	0	1.6	3.84	Barman et al., 2000	110
AAU,Jorhat, Assam	India	0.394432	5.2	1997, kharif	Unknown	Unknown	no	0	1.57	3.768	Barman et al., 2000	110
AAU,Jorhat, Assam	India	0.37703	5.2	1997, kharif	Unknown	Unknown	no	0	1.81	4.344	Barman et al., 2000	110
Chongqing	China	2.00696	7.14	1995.5-1995.8	flooded	CF	straw_on_season	5	15.11	36.3	Cai et al., 2000	101
Chongqing	China	2.10557	7.06	1995.5-1995.8	flooded	CF	straw_on_season	5	17.22	41.3	Cai et al., 2000	101
Chongqing	China	2.35499	6.8	1995.5-1995.8	long	CF	straw_on_season	5	4.77	11.4	Cai et al., 2000	101
Chongqing	China	2.00696	7.14	1996.5-1996.9	flooded	CF	straw_on_season	7	35.6	87.1	Cai et al., 2000	103
Chongqing	China	2.10557	7.06	1996.5-1996.9	flooded	CF	straw_on_season	7	33.47	81.9	Cai et al., 2000	103
Chongqing	China	2.35499	6.8	1996.5-1996.9	long	CF	straw_on_season	7	24.56	60.1	Cai et al., 2000	103
Chongqing	China	1.88515	6.62	1996.5-1996.9	long	CF	straw_on_season	7	21.63	77.4	Cai et al., 2000	103
Chongqing	China	2.00696	7.14	1997.5-1997.8	flooded	CF	straw_on_season	5	17.94	43.5	Cai et al., 2000	102
Chongqing	China	2.10557	7.06	1997.5-1997.8	flooded	CF	straw_on_season	5	19.06	46.6589	Cai et al., 2000	102
Chongqing	China	2.35499	6.8	1997.5-1997.8	long	CF	straw_on_season	5	19.22	47.0506	Cai et al., 2000	102
Chongqing	China	1.88515	6.62	1997.5-1997.8	long	CF	straw_on_season	5	17.97	43.9906	Cai et al., 2000	102
Chongqing	China	2.00696	7.14	1998	flooded	CF	straw_on_season	5	14.6	33.288	Cai et al., 2003	95
Chongqing	China	2.10557	7.06	1998	flooded	CF	straw_on_season	5	11.72	26.7216	Cai et al., 2003	95
Chongqing	China	2.35499	6.8	1998	long	CF	straw_on_season	5	8.4	19.152	Cai et al., 2003	95
Chongqing	China	1.88515	6.62	1998	long	CF	straw_on_season	5	5.42	12.3576	Cai et al., 2003	95
Chongqing	China	2.00696	7.14	1999	flooded	CF	straw_on_season	5	24.55	55.974	Cai et al., 2003	95
Chongqing	China	2.10557	7.06	1999	flooded	CF	straw_on_season	5	15.99	36.4572	Cai et al., 2003	95
Chongqing	China	2.35499	6.8	1999	long	CF	straw_on_season	5	11.07	25.2396	Cai et al., 2003	95
Chongqing	China	1.88515	6.62	1999	long	CF	straw_on_season	5	14.23	32.4444	Cai et al., 2003	95
Chongqing	China	2.00696	7.14	2000	flooded	CF	straw_on_season	5	55.88	127.406	Cai et al., 2003	95
Chongqing	China	2.10557	7.06	2000	flooded	CF	straw_on_season	5	23.49	53.5572	Cai et al., 2003	95
Chongqing	China	2.35499	6.8	2000	long	CF	straw_on_season	5	26.92	61.3776	Cai et al., 2003	95
Chongqing	China	1.88515	6.62	2000	long	CF	straw_on_season	5	18.25	41.61	Cai et al., 2003	95
Tuzu, Sichuan	China	0.910673	5	1988-1994	long	CF	FYM	30	30	86.4	Khalil et al., 1998	120
Guiyang, Guizhou	China	3.43387	7.4	1991.6-1991.9	Unknown	SD	FYM	22.5	15.6	37.44	Cao and Hong, 1996	100
Taoyuan, Hunan	China	1.51972	5.74	1991.4-1991.7	short	CF	GM	15	26.5	47.7	Wassmann et al., 1993	75
Taoyuan, Hunan	China	1.51972	5.74	1991.4-1991.7	short	CF	no	0	6.5	11.7	Wassmann et al., 1993	75
Taoyuan, Hunan	China	1.51972	5.74	1991.4-1991.7	short	CF	GM	18	38.6	69.48	Wassmann et al., 1993	75
Taoyuan, Hunan	China	1.51972	5.74	1991.4-1991.7	short	CF	Compost	45	15.9	28.62	Wassmann et al., 1993	75
Taoyuan, Hunan	China	1.51972	5.74	1991.7-1991.10	flooded	CF	straw_on_season	3	50.1	102.204	Wassmann et al., 1993	85
Taoyuan, Hunan	China	1.51972	5.74	1991.7-1991.10	flooded	CF	no	0	14.3	29.172	Wassmann et al., 1993	85
Taoyuan, Hunan	China	1.51972	5.74	1991.7-1991.10	flooded	CF	straw_on_season	5	56.2	114.648	Wassmann et al., 1993	85
Taoyuan, Hunan	China	1.51972	5.74	1991.7-1991.10	flooded	CF	Compost	45	22.5	45.9	Wassmann et al., 1993	85
Taoyuan, Hunan	China	1.51972	5.74	1992.4-1992.7	short	CF	GM	15	8	14.4	Wassmann et al., 1996	75
Taoyuan, Hunan	China	1.51972	5.74	1992.4-1992.7	short	CF	no	0	3	5.4	Wassmann et al., 1996	75
Taoyuan, Hunan	China	1.51972	5.74	1992.4-1992.7	short	CF	GM	18	9.5	17.1	Wassmann et al., 1996	75
Taoyuan, Hunan	China	1.51972	5.74	1992.7-1992.10	flooded	CF	straw_on_season	3	14.2	28.968	Wassmann et al., 1996	85
Taoyuan, Hunan	China	1.51972	5.74	1992.7-1992.10	flooded	CF	no	0	3.2	6.528	Wassmann et al., 1996	85
Taoyuan, Hunan	China	1.51972	5.74	1992.7-1992.10	flooded	CF	straw_on_season	5	18.8	38.352	Wassmann et al., 1996	85
Guangzhou	China	1.88515	5.1	1995early	short	CF	no	0	6.22	12.6888	Tao, 1998	95
Guangzhou	China	1.88515	5.1	1995early	short	CF	no	0	4.21	8.5884	Tao, 1998	95
Guangzhou	China	1.88515	5.1	1995early	short	CF	no	0	7.07	14.4228	Tao, 1998	95
Guangzhou	China	1.88515	5.1	1995early	short	MD	no	0	3.53	7.2012	Tao, 1998	95
Guangzhou	China	1.88515	5.1	1995late	flooded	CF	no	0	20.81	49.944	Tao, 1998	90
Guangzhou	China	1.88515	5.1	1995late	flooded	CF	no	0	15.68	37.632	Tao, 1998	90
Guangzhou	China	1.88515	5.1	1995late	flooded	CF	no	0	19.88	47.712	Tao, 1998	90
Guangzhou	China	1.88515	5.1	1995late	flooded	MD	no	0	17.26	41.424	Tao, 1998	90
Guangzhou	China	1.01508	6.1	1994.4-1994.7	long	CF	no	0	3.81	8.32104	Cai et al., 2000	91
Guangzhou	China	1.01508	6.1	1994.4-1994.7	long	MD	no	0	0.28	0.61152	Cai et al., 2000	91
Guangzhou	China	1.01508	6.1	1994.4-1994.7	long	MD	no	0	0.22	0.48048	Cai et al., 2000	91
Guangzhou	China	1.01508	6.1	1994.8-1994.11	flooded	CF	no	0	17.63	42.312	Cai et al., 2000	100
Guangzhou	China	1.01508	6.1	1994.8-1994.11	flooded	MD	no	0	2.84	6.816	Cai et al., 2000	100
Guangzhou	China	1.01508	6.1	1994.8-1994.11	two	MD	no	0	0.36	0.864	Cai et al., 2000	100
Guangzhou	China	1.01508	6.1	1995.4-1995.7	flooded	CF	no	0	12.28	26.8195	Cai et al., 2000	91
Guangzhou	China	1.01508	6.1	1995.4-1995.7	short	MD	no	0	2.63	5.74392	Cai et al., 2000	91
Guangzhou	China	1.01508	6.1	1995.4-1995.7	two	MD	no	0	0.72	1.57248	Cai et al., 2000	91
Guangzhou	China	1.01508	6.1	1995.4-1995.7	two	MD	no	0	0.21	0.45864	Cai et al., 2000	91
Guangzhou	China	1.01508	6.1	1995.8-1995.11	flooded	CF	no	0	32.82	78.768	Cai et al., 2000	100
Guangzhou	China	1.01508	6.1	1995.8-1995.11	flooded	MD	no	0	8.12	19.488	Cai et al., 2000	100
Guangzhou	China	1.01508	6.1	1995.8-1995.11	two	MD	no	0	0.14	0.336	Cai et al., 2000	100
Guangzhou	China	1.01508	6.1	1995.8-1995.11	flooded	MD	no	0	5.68	13.632	Cai et al., 2000	100
Changsha, Hunan	China	1.2877	5.86	1995.5-1995.7	short	MD	GM	5.25	11.33	20.1221	Cai et al., 2000	74
Changsha, Hunan	China	1.2877	5.86	1995.5-1995.7	short	MD	GM	3.75	8.38	14.8829	Cai et al., 2000	74
Changsha, Hunan	China	1.2877	5.86	1995.7-1995.10	flooded	MD	no	0	13.74	29.3486	Cai et al., 2000	89
Changsha, Hunan	China	1.2877	5.86	1995.7-1995.10	flooded	MD	no	0	6.12	13.0723	Cai et al., 2000	89
Changsha, Hunan	China	1.2877	5.86	1996.5-1996.7	short	MD	GM	2.25	18.12	31.7462	Cai et al., 2000	73
Changsha, Hunan	China	1.2877	5.86	1996.5-1996.7	short	MD	GM	13	15.89	27.8393	Cai et al., 2000	73
Changsha, Hunan	China	1.2877	5.86	1996.5-1996.7	short	MD	GM	26.9	54.57	95.6066	Cai et al., 2000	73
Changsha, Hunan	China	1.2877	5.86	1996.5-1996.7	flooded	MD	no	0	19.63	34.3918	Cai et al., 2000	73
Changsha, Hunan	China	1.2877	5.86	1996.7-1996.10	flooded	MD	no	0	13.12	23.9309	Cai et al., 2000	76
Changsha, Hunan	China	1.2877	5.86	1996.7-1996.10	flooded	MD	no	0	3.83	6.98592	Cai et al., 2000	76
Changsha, Hunan	China	1.2877	5.86	1996.7-1996.10	flooded	MD	no	0	9.45	17.2368	Cai et al., 2000	76
Changsha, Hunan	China	1.2877	5.86	1996.7-1996.10	flooded	MD	no	0	22.28	40.6387	Cai et al., 2000	76
Changsha, Hunan	China	1.2877	5.86	1997.5-1997.7	short	MD	GM	4.5	15.12	26.4902	Cai et al., 2000	73
Changsha, Hunan	China	1.2877	5.86	1997.5-1997.7	short	MD	GM	12.6	9.37	16.4162	Cai et al., 2000	73
Changsha, Hunan	China	1.2877	5.86	1997.5-1997.7	short	MD	GM	10.9	12.88	22.5658	Cai et al., 2000	73
Changsha, Hunan	China	1.2877	5.86	1997.5-1997.7	flooded	MD	no	0	29.73	52.087	Cai et al., 2000	73
Changsha, Hunan	China	1.2877	5.86	1997.7-1997.10	flooded	MD	no	0	25.49	46.4938	Cai et al., 2000	76
Changsha, Hunan	China	1.2877	5.86	1997.7-1997.10	flooded	MD	no	0	5.17	9.43008	Cai et al., 2000	76
Changsha, Hunan	China	1.2877	5.86	1997.7-1997.10	flooded	MD	no	0	7.31	13.3334	Cai et al., 2000	76
Changsha, Hunan	China	1.2877	5.86	1997.7-1997.10	flooded	MD	no	0	33.66	61.3958	Cai et al., 2000	76
Wuhan	China	1.2471	5.8	1995.5-1995.7	short	CF	FYM	22.5	15.6	31	Lin et al., 2000	74
Wuhan	China	1.2471	5.8	1995.5-1995.7	short	CF	no	0	6.69	13.3	Lin et al., 2000	74
Wuhan	China	1.2471	5.8	1995.5-1995.7	short	CF	no	0	4.39	8.75	Lin et al., 2000	74
Wuhan	China	1.2471	5.8	1995.5-1995.7	short	CF	no	0	8.38	16.7	Lin et al., 2000	74
Wuhan	China	1.2471	5.8	1995.5-1995.7	short	MD	no	0	5.11	10.2	Lin et al., 2000	74
Wuhan	China	1.2471	5.8	1995-7-1995.11	flooded	CF	FYM	22.5	22	50.7	Lin et al., 2000	96
Wuhan	China	1.2471	5.8	1995-7-1995.11	flooded	CF	no	0	6.54	15.1	Lin et al., 2000	96
Wuhan	China	1.2471	5.8	1995-7-1995.11	flooded	CF	no	0	5.65	13	Lin et al., 2000	96
Wuhan	China	1.2471	5.8	1995-7-1995.11	flooded	CF	no	0	11.1	25.6	Lin et al., 2000	96
Wuhan	China	1.2471	5.8	1995-7-1995.11	flooded	MD	no	0	8.2	18.9	Lin et al., 2000	96
Fenqiu, Henan	China	0.110209	9	1993.6-1993.10	long	MD	FYM	4.5	0.46	1.2	Cai et al., 2000	109
Fenqiu, Henan	China	0.452436	8.6	1993.6-1993.10	long	MD	FYM	4.5	0.72	1.9	Cai et al., 2000	109
Fenqiu, Henan	China	0.440835	7.63	1993.6-1993.10	long	MD	FYM	4.5	0.16	0.4	Cai et al., 2000	109
Fenqiu, Henan	China	0.110209	9	1994.6-1994.10	long	MD	FYM	5	1.86	4.8	Cai et al., 2000	109
Fenqiu, Henan	China	0.452436	8.6	1994.6-1994.10	long	MD	FYM	5	0.62	1.6	Cai et al., 2000	109
Fenqiu, Henan	China	0.440835	7.63	1994.6-1994.10	long	MD	FYM	5	0.44	1.2	Cai et al., 2000	109
Beijing	China	0.986079	7.99	1995.6-1995.10	long	MD	no	0	0.791667	2.6	Wang et al., 2000	136
Beijing	China	0.986079	7.99	1996.5-1996.10	long	SD	no	0	0.666667	2.2	Wang et al., 2000	138
Beijing	China	0.986079	7.99	1996.5-1996.10	long	SD	no	0	1.5	4.9	Wang et al., 2000	138
Beijing	China	0.986079	7.99	1996.5-1996.10	long	SD	no	0	1.33333	4.4	Wang et al., 2000	138
Beijing	China	0.986079	7.99	1996.5-1996.10	long	SD	no	0	0.958333	3.2	Wang et al., 2000	138
Yingtan, Jiangxi	China	1.2123	5.49	1993.5-1993.7	short	MD	no	0	10.88	20.8896	Cai et al., 2000	80
Yingtan, Jiangxi	China	1.64153	5.7	1993.5-1993.7	short	MD	FYM	7	19.11	36.6912	Cai et al., 2000	80
Yingtan, Jiangxi	China	1.91415	5.49	1993.5-1993.7	flooded	MD	no	0	41.32	79.3344	Cai et al., 2000	80
Yingtan, Jiangxi	China	1.2123	5.49	1993.7-1993.11	flooded	MD	straw_on_season	7.125	31.88	75.7469	Cai et al., 2000	99
Yingtan, Jiangxi	China	1.64153	5.7	1993.7-1993.11	flooded	MD	straw_on_season	7.125	44.18	104.972	Cai et al., 2000	99
Yingtan, Jiangxi	China	1.91415	5.49	1993.7-1993.11	flooded	MD	straw_on_season	7.125	53.01	125.952	Cai et al., 2000	99
Yingtan, Jiangxi	China	1.2123	5.49	1994.5-1994.7	short	MD	no	0	16.57	31.8144	Cai et al., 2000	80
Yingtan, Jiangxi	China	1.64153	5.7	1994.5-1994.7	short	MD	no	0	11.66	22.3872	Cai et al., 2000	80
Yingtan, Jiangxi	China	1.91415	5.49	1994.5-1994.7	flooded	MD	no	0	34.77	66.7584	Cai et al., 2000	80
Yingtan, Jiangxi	China	1.2123	5.49	1994.7-1994.11	flooded	MD	straw_on_season	7.125	21.88	51.9869	Cai et al., 2000	99
Yingtan, Jiangxi	China	1.64153	5.7	1994.7-1994.11	flooded	MD	straw_on_season	7.125	14.15	33.6204	Cai et al., 2000	99
Yingtan, Jiangxi	China	1.91415	5.49	1994.7-1994.11	flooded	MD	straw_on_season	7.125	25.04	59.495	Cai et al., 2000	99
Jurong, Jiangsu	China	0.574246	6.3	1995.6-1995.10	long	MD	straw_off_season	1.5	0.66	1.8	Cai et al., 2000	106
Jurong, Jiangsu	China	0.574246	6.3	1995.6-1995.10	long	MD	straw_off_season	1.5	0.81	2.2	Cai et al., 2000	106
Jurong, Jiangsu	China	0.574246	6.3	1995.6-1995.10	long	MD	straw_off_season	1.5	0.54	1.5	Cai et al., 2000	106
Jurong, Jiangsu	China	0.574246	6.3	1995.6-1995.10	long	MD	straw_off_season	1.5	0.69	1.9	Cai et al., 2000	106
Jurong, Jiangsu	China	0.574246	6.3	1995.6-1995.10	long	MD	no	0	0.46	1.3	Cai et al., 2000	106
Jurong, Jiangsu	China	0.574246	6.3	1997.6-1997.10	long	MD	straw_off_season	1.5	2.02	5.6	Cai et al., 2000	113
Jurong, Jiangsu	China	0.574246	6.3	1997.6-1997.10	long	MD	straw_off_season	1.5	2.07	5.7	Cai et al., 2000	113
Jurong, Jiangsu	China	0.574246	6.3	1997.6-1997.10	long	MD	straw_off_season	1.5	1.63	4.5	Cai et al., 2000	113
Jurong, Jiangsu	China	0.574246	6.3	1997.6-1997.10	long	MD	straw_off_season	1.5	2.38	6.6	Cai et al., 2000	113
Jurong, Jiangsu	China	0.574246	6.3	1997.6-1997.10	long	MD	no	0	1.01	2.8	Cai et al., 2000	113
Yancheng, Jiangsu	China	1.25	8.3	2001	long	MD	no	0	0.23	0.33	Xu et al., 2004		140
Yancheng, Jiangsu	China	1.25	8.3	2001	long	CF	no	0	1.83	6.17	Xu et al., 2004		140
Hangzhou	China	2.39559	6.2	1995.5-1995.10	short	SD	no	0	7.59167	23.87	Lu et al., 2000	104
Hangzhou	China	2.39559	6.2	1996.5-1996.7	short	SD	no	0	5.15417	9.52	Lu et al., 2000	79
Hangzhou	China	2.39559	6.2	1996.5-1996.7	short	SD	no	0	4.825	8.91	Lu et al., 2000	79
Hangzhou	China	2.39559	6.2	1996.7-1996.11	flooded	SD	no	0	3.99167	10.06	Lu et al., 2000	106
Hangzhou	China	2.39559	6.2	1996.7-1996.10	flooded	SD	no	0	4.875	11.23	Lu et al., 2000	97
Hangzhou	China	2.39559	6.2	1996.7-1996.10	flooded	SD	no	0	5.76667	18.26	Lu et al., 2000	97
Hangzhou	China	2.39559	6.2	1996.6-1996.9	long	SD	no	0	7.07917	16.65	Lu et al., 2000	103
Hangzhou	China	2.39559	6.2	1997.5-1997.7	short	SD	no	0	2.90417	5.3	Lu et al., 2000	78
Hangzhou	China	2.39559	6.2	1997.7-1997.11	flooded	SD	no	0	5.04167	14.16	Lu et al., 2000	119
Hangzhou	China	2.39559	6.2	1997.6-1997.9	long	SD	no	0	3.61667	8.76	Lu et al., 2000	103
Hangzhou	China	2.39559	6.2	1998.4-1998.7	short	SD	no	0	7.48333	14.19	Lu et al., 2000	81
Hangzhou	China	2.39559	6.2	1998.7-1998.11	flooded	SD	no	0	6.9375	18.49	Lu et al., 2000	112
Hangzhou	China	2.39559	6.2	1998.7-1998.11	flooded	SD	no	0	10.4875	17.94	Lu et al., 2000	112
Hangzhou	China	2.39559	6.2	1998.7-1998.11	flooded	MD	no	0	8.05417	21.45	Lu et al., 2000	112
Hangzhou	China	2.39559	6.2	1998.7-1998.11	flooded	SD	no	0	9.29583	24.77	Lu et al., 2000	112
Hangzhou	China	2.41299	6.2	1996.5-1996.7	short	MD	no	0	4.83333	8.91	Lu et al., 1999	79
Hangzhou	China	2.41299	6.2	1996.5-1996.7	short	MD	no	0	5.16667	9.52	Duan et al., 1999	79
Hangzhou	China	2.41299	6.2	1996.7.1996.11	flooded	MD	no	0	4.875	11.22	Duan et al., 1999	108
Hangzhou	China	2.41299	6.2	1996.7.1996.11	flooded	MD	no	0	4	10.05	Duan et al., 1999	108
Hangzhou	China	2.41299	6.2	1996.6-1996.10	long	MD	no	0	7.20833	16.63	Duan et al., 1999	124
Hangzhou	China	2.41299	6.2	1996.6-1996.10	long	MD	no	0	7.875	18.25	Duan et al., 1999	124
Hangzhou	China	2.41299	6.2	late rice	flooded	Unknown	no	0	7.625	18.3	Chen et al., 2002		111
Hangzhou	China	2.41299	6.2	late rice	flooded	Unknown	straw_on_season	1.2	11.5833	27.8	Chen et al., 2002		111
Hangzhou	China	2.41299	6.2	late rice	flooded	Unknown	straw_on_season	1.2	10.25	24.6	Chen et al., 2002		111
Suzhou, Jiangsu	China	2.02436	6.5	June-Oct	long	MD	no	0	6.74691	21.86	Zhen et al., 1997	135
Suzhou, Jiangsu	China	2.30858	6.29	1993.6-1993.10	long	MD	no	0	5.31	16.5672	Cai et al., 2000	130
Suzhou, Jiangsu	China	2.30858	6.29	1993.6-1993.10	long	MD	no	0	3.2	9.984	Cai et al., 2000	130
Suzhou, Jiangsu	China	2.30858	6.29	1993.6-1993.10	long	MD	FYM	15	5.85	18.252	Cai et al., 2000	130
Suzhou, Jiangsu	China	2.30858	6.29	1993.6-1993.10	long	CF	no	0	6.22	19.4064	Cai et al., 2000	130
Shenyang	China	0.939675	6.4	1993	long	CF	no	0	3.4	9.792	Chen et al., 1995	120	66
Shenyang	China	0.939675	6.4	1993	long	CF	no	0	4.2	12.096	Chen et al., 1995	120	66
Shenyang	China	0.939675	6.4	1993	long	CF	FYM	37.5	5.3	15.264	Chen et al., 1995	120	66
Shenyang	China	0.939675	6.4	1993	long	CF	FYM	37.5	13.9	40.032	Chen et al., 1995	120	66
Xinlicheng, Liaoning	China	1.1949	6.9	1995	long	MD	FYM	24	0.271	0.706	Yan et al., 2000
Xinlicheng, Liaoning	China	1.2471	6.9	1995	long	MD	FYM	24	0.707	1.7	Yan et al., 2000
Wanchang, Liaoning	China	1.53712	7	1996	long	CF	FYM	24	4.896	16.1	Yan et al., 2000
Wanchang, Liaoning	China	1.53712	7	1996	long	CF	FYM	24	9.216	35.4	Yan et al., 2000
Kyoto	Japan	4.13	5.8	1996	long	MD	straw_off_season	9.82558	6.14355	20.2	Matsumoto et al., 2002	137	137
Kyoto	Japan	4.13	5.8	1996	long	MD	straw_off_season	7.61006	7.32968	24.1	Matsumoto et al., 2002	137	137
Kyoto	Japan	4.13	5.8	1996	long	MD	straw_off_season	9.825	7.23844	23.8	Matsumoto et al., 2002	137	137
Kyoto	Japan	4.13	5.8	1996	long	MD	straw_off_season	7.61	11.6484	38.3	Matsumoto et al., 2002	137	137
Kyoto	Japan	4.13	5.8	1997	long	MD	straw_off_season	9.71698	5.18411	10.7	Matsumoto et al., 2002	86	86
Kyoto	Japan	4.13	5.8	1997	flooded	MD	straw_off_season	9.71698	19.5736	40.4	Matsumoto et al., 2002	86	86
Kyoto	Japan	4.13	5.8	1998	long	MD	straw_off_season	9.71698	20.8333	35.5	Matsumoto et al., 2002	71	71
Kyoto	Japan	4.13	5.8	1998	long	MD	straw_off_season	9.71698	14.8474	25.3	Matsumoto et al., 2002	71	71
Tsukuba, Ibaraki	Japan	2.2	5.9	1988.5.1988.9	long	MD	no	0	0.2	0.6	Yagi and Minami, 1990
Tsukuba, Ibaraki	Japan	2.2	5.9	1988.5.1988.9	long	MD	straw_off_season	6	0.4	1.1	Yagi and Minami, 1990
Ryugasaki, Ibraki	Japan	1.4	5.9	1988.5.1988.9	long	MD	no	0	2.8	8	Yagi and Minami, 1990		120
Ryugasaki, Ibraki	Japan	1.4	5.9	1988.5.1988.9	long	MD	no	0	2.9	8.2	Yagi and Minami, 1990		120
Ryugasaki, Ibraki	Japan	1.4	5.9	1988.5.1988.9	long	MD	Compost	12	3.8	10.5	Yagi and Minami, 1990		120
Ryugasaki, Ibraki	Japan	1.4	5.9	1988.5.1988.9	long	MD	straw_off_season	6	9.6	27	Yagi and Minami, 1990		120
Ryugasaki, Ibraki	Japan	1.6	6.1	1991.5-1991.9	long	CF	straw_off_season	5	4.85564	14.8	Yagi et al., 1996		127
Ryugasaki, Ibraki	Japan	1.6	6.1	1991.5-1991.9	long	MD	straw_off_season	5	2.83136	8.63	Yagi et al., 1996		127
Ryugasaki, Ibraki	Japan	1.6	6.1	1993.5-1993.10	long	CF	straw_off_season	5	2.63611	9.49	Yagi et al., 1996		150
Ryugasaki, Ibraki	Japan	1.6	6.1	1993.5-1993.10	long	MD	straw_off_season	5	1.43889	5.18	Yagi et al., 1996		150
Kawachi, Ibaraki	Japan	3.4	5.6	1988.5.1988.9	long	MD	straw_off_season	6	16.3	44.8	Yagi and Minami, 1990
Mito, Ibaraki	Japan	6	6.5	1988.5.1988.9	long	MD	no	0	1.4	4.1	Yagi and Minami, 1990		120
Mito, Ibaraki	Japan	6	6.5	1988.5.1988.9	long	MD	no	0	1.2	3.6	Yagi and Minami, 1990		120
Mito, Ibaraki	Japan	6	6.5	1988.5.1988.9	long	MD	Compost	12	1.9	5.9	Yagi and Minami, 1990		120
Mito, Ibaraki	Japan	6	6.5	1988.5.1988.9	long	MD	straw_off_season	6	3.2	9.8	Yagi and Minami, 1990		120
Mito, Ibaraki	Japan	6	6.5	1988.5.1988.9	long	MD	straw_off_season	9	4.1	12.6	Yagi and Minami, 1990		120
Yamakata	Japan	1.41	6.3	1994.5-1994.9	long	CF	straw_on_season	6	13.0833	37.68	Kumagai and Konno, 1998		120
Yamakata	Japan	1.41	6.3	1995.5-1995.9	long	CF	straw_on_season	6	15.0382	43.31	Kumagai and Konno, 1998		120
Yamakata	Japan	1.41	6.3	1996.5-1996.9	long	CF	straw_on_season	6	11.7674	33.89	Kumagai and Konno, 1998		120
Yamagata	Japan	1.26	5.3	1992	long	MD	straw_on_season	6	7.6087	25.2	Kumagai et al., 2000		138
Yamagata	Japan	1.2	5.4	1992	long	MD	no	0	2.50604	8.3	Kumagai et al., 2000		138
Yamagata	Japan	1.26	5.3	1993	long	MD	straw_on_season	6	7.37179	23	Kumagai et al., 2000		130
Yamagata	Japan	1.2	5.4	1993	long	MD	no	0	3.71795	11.6	Kumagai et al., 2000		130
Yamagata	Japan	1.26	5.3	1994	long	MD	straw_on_season	6	7.36111	21.2	Kumagai et al., 2000		120
Yamagata	Japan	1.2	5.4	1994	long	MD	no	0	1.45833	4.2	Kumagai et al., 2000		120
Kamikawa, Hokkaido	Japan	1.26	6.1	1997	long	CF	straw_off_season	4	3.50529	10.6	Goto et al., 2004	126	92
Kamikawa, Hokkaido	Japan	1.26	6.1	1997	long	CF	straw_off_season	4	2.94312	8.9	Goto et al., 2004	126	92
Kamikawa, Hokkaido	Japan	1.26	6.1	1998	long	CF	straw_off_season	4	1.73333	5.2	Goto et al., 2004	125	105
Kamikawa, Hokkaido	Japan	1.26	6.1	1998	long	CF	straw_off_season	4	1.46667	4.4	Goto et al., 2004	125	105
Kamikawa, Hokkaido	Japan	1.26	6.1	1998	long	CF	straw_on_season	4	3.16667	9.5	Goto et al., 2004	125	105
Kamikawa, Hokkaido	Japan	1.26	6.1	1998	long	CF	straw_on_season	4	2.66667	8	Goto et al., 2004	125	105
Kamikawa, Hokkaido	Japan	1.26	6.1	1998	long	CF	no	0	0.5	1.5	Goto et al., 2004	125	105
Kamikawa, Hokkaido	Japan	1.26	6.1	1999	long	CF	straw_off_season	4	4.42478	12	Goto et al., 2004	113	98
Kamikawa, Hokkaido	Japan	1.26	6.1	1999	long	CF	straw_off_season	4	3.65044	9.9	Goto et al., 2004	113	98
Kamikawa, Hokkaido	Japan	1.26	6.1	1999	long	CF	straw_on_season	4	6.30531	17.1	Goto et al., 2004	113	98
Kamikawa, Hokkaido	Japan	1.26	6.1	1999	long	CF	straw_on_season	4	4.60914	12.5	Goto et al., 2004	113	98
Kamikawa, Hokkaido	Japan	1.26	6.1	1999	long	CF	no	0	1.76991	4.8	Goto et al., 2004	113	98
Kamikawa, Hokkaido	Japan	1.26	6.1	1996	long	CF	no	0	2.71318	8.4	Goto et al., 2004	129
Kamikawa, Hokkaido	Japan	1.26	6.1	1996	long	MD	no	0	1.35659	4.2	Goto et al., 2004	129
Kamikawa, Hokkaido	Japan	1.26	6.1	1996	long	MD	no	0	1.77649	5.5	Goto et al., 2004	129
Kamikawa, Hokkaido	Japan	1.26	6.1	1997	long	CF	no	0	1.78571	5.4	Goto et al., 2004	126	92
Kamikawa, Hokkaido	Japan	1.26	6.1	1997	long	MD	no	0	1.02513	3.1	Goto et al., 2004	126	92
Kamikawa, Hokkaido	Japan	1.26	6.1	1997	long	MD	no	0	1.71958	5.2	Goto et al., 2004	126	92
Kamikawa, Hokkaido	Japan	1.26	6.1	1997	long	MD	no	0	1.15741	3.5	Goto et al., 2004	126	92
Kamikawa, Hokkaido	Japan	1.26	6.1	1998	long	CF	no	0	2.96667	8.9	Goto et al., 2004	125	105
Kamikawa, Hokkaido	Japan	1.26	6.1	1998	long	MD	no	0	1.56667	4.7	Goto et al., 2004	125	105
Kamikawa, Hokkaido	Japan	1.26	6.1	1998	long	MD	no	0	2.53333	7.6	Goto et al., 2004	125	105
Kamikawa, Hokkaido	Japan	1.26	6.1	1998	long	MD	no	0	1.7	5.1	Goto et al., 2004	125	105
Kamikawa, Hokkaido	Japan	1.26	6.1	1998	long	CF	straw_on_season	3	9.53333	28.6	Goto et al., 2004	125	105
Kamikawa, Hokkaido	Japan	1.26	6.1	1998	long	MD	straw_on_season	3	6.96667	20.9	Goto et al., 2004	125	105
Kamikawa, Hokkaido	Japan	1.26	6.1	1998	long	MD	straw_on_season	3	8.43333	25.3	Goto et al., 2004	125	105
Kamikawa, Hokkaido	Japan	1.26	6.1	1998	long	MD	straw_on_season	3	6.3	18.9	Goto et al., 2004	125	105
Kamikawa, Hokkaido	Japan	1.26	6.1	1999	long	CF	no	0	3.68732	10	Goto et al., 2004	113	98
Kamikawa, Hokkaido	Japan	1.26	6.1	1999	long	MD	no	0	3.06047	8.3	Goto et al., 2004	113	98
Kamikawa, Hokkaido	Japan	1.26	6.1	1999	long	CF	straw_on_season	3	18.5472	50.3	Goto et al., 2004	113	98
Kamikawa, Hokkaido	Japan	1.26	6.1	1999	long	MD	straw_on_season	3	9.25516	25.1	Goto et al., 2004	113	98
Kamikawa, Hokkaido	Japan	1.26	6.1	1999	long	MD	straw_on_season	3	16.3717	44.4	Goto et al., 2004	113	98
Kamikawa, Hokkaido	Japan	1.26	6.1	1999	long	MD	straw_on_season	3	9.69764	26.3	Goto et al., 2004	113	98
Shizukuishi, Iwate	Japan	8.25	5.6	1999	long	CF	no	0	5.41102	15.9733	Inubushi et al., 2003	123	110
Shizukuishi, Iwate	Japan	8.25	5.6	2000	long	CF	no	0	2.66667	7.68	Inubushi et al., 2003	120	110
Atsugi, Kanagawa	Japan	2.51	6.21	1993	long	SD	straw_off_season	6	4.2808	15.1027	Morimura et al., 1995	147	100
Atsugi, Kanagawa	Japan	2.51	6.21	1993	long	SD	straw_off_season	6	3.06305	10.8064	Morimura et al., 1995	147	100
Central Lampung, Southern Sumatra	Indonesia	1.15	5	1992.12-1993.3	short	CF	no	0	15	32.4	Nugroho et al., 1994a	90	77
Central Lampung, Southern Sumatra	Indonesia	1.15	5	1992.12-1993.3	short	CF	no	0	14.537	31.4	Nugroho et al., 1994a	90	77
Central Lampung, Southern Sumatra	Indonesia	1.15	5	1992.12-1993.3	short	CF	straw_on_season	5	21.8519	47.2	Nugroho et al., 1994a	90	77
Central Lampung, Southern Sumatra	Indonesia	1.15	5	1992.12-1993.3	short	CF	GM	5	18.0556	39	Nugroho et al., 1994a	90	77
Central Lampung, Southern Sumatra	Indonesia	1.15	5	1992.12-1993.3	short	CF	FYM	5	15.787	34.1	Nugroho et al., 1994a	90	77
Central Lampung, Southern Sumatra	Indonesia	0.98	4.9	1993.4-1993.7	flooded	CF	no	0	21.5601	44.5	Nugroho et al., 1994b	86	77
Central Lampung, Southern Sumatra	Indonesia	1.23	5	1993.4-1993.7	flooded	CF	no	0	21.0756	43.5	Nugroho et al., 1994b	86	77
Central Lampung, Southern Sumatra	Indonesia	1.05	4.7	1993.4-1993.7	flooded	CF	no	0	17.2965	35.7	Nugroho et al., 1994b	86	77
Central Lampung, Southern Sumatra	Indonesia	1.11	4.8	1993.4-1993.7	flooded	CF	straw_on_season	5	24.3217	50.2	Nugroho et al., 1994b	86	77
Central Lampung, Southern Sumatra	Indonesia	1.04	4.9	1993.4-1993.7	flooded	CF	GM	5	21.8992	45.2	Nugroho et al., 1994b	86	77
Central Lampung, Southern Sumatra	Indonesia	1.1	4.7	1993.4-1993.7	flooded	CF	FYM	5	15.5039	32	Nugroho et al., 1994b	86	77
Central Lampung, Southern Sumatra	Indonesia	1.1	5	1993.12-1994.3	short	CF	no	0	16.6	30.8	Nugroho et al., 1996	93	77
Central Lampung, Southern Sumatra	Indonesia	1.3	5	1993.12-1994.3	short	CF	straw_on_season	5	23.4	43.2	Nugroho et al., 1996	93	77
Central Lampung, Southern Sumatra	Indonesia	1.1	5.1	1994.5-1994.8	short	CF	no	0	17.8	33	Nugroho et al., 1996	104	77
Central Lampung, Southern Sumatra	Indonesia	1.3	5.2	1994.5-1994.8	short	CF	straw_on_season	5	23.3	43	Nugroho et al., 1996	104	77
Central Lampung, Southern Sumatra	Indonesia	1.1	5	1994.12.1995.3	short	CF	no	0	21.5	39.8	Nugroho et al., 1996	92	77
Central Lampung, Southern Sumatra	Indonesia	1.3	5.1	1994.12.1995.3	short	CF	straw_on_season	5	29	53.6	Nugroho et al., 1996	92	77
Central Lampung, Southern Sumatra	Indonesia	1.1	5.1	1995.5-1995.8	short	CF	no	0	16	29.5	Nugroho et al., 1996	98	77
Central Lampung, Southern Sumatra	Indonesia	1.4	5.2	1995.5-1995.8	short	CF	straw_on_season	5	25.5	47.2	Nugroho et al., 1996	98	77
Central Lampung, Southern Sumatra	Indonesia	1.08	5	1994.12-1995.3	short	CF	no	0	22.6	41.7	Nugroho et al., 1997	91	77
Central Lampung, Southern Sumatra	Indonesia	1.08	5	1994.12-1995.4	short	CF	no	0	18.2	36.8	Nugroho et al., 1997	104	84
Central Lampung, Southern Sumatra	Indonesia	1.08	5	1994.12-1995.4	short	CF	no	0	17.7	32.6	Nugroho et al., 1997	99	77
Central Lampung, Southern Sumatra	Indonesia	1.08	5	1994.12-1995.4	short	CF	no	0	19.8	36.5	Nugroho et al., 1997	104	77
Central Lampung, Southern Sumatra	Indonesia	1.08	5	1994.12-1995.4	short	CF	no	0	17.8	32.7	Nugroho et al., 1997	99	77
Central Lampung, Southern Sumatra	Indonesia	1.08	5	1994.12-1995.4	short	CF	no	0	20.5	37.8	Nugroho et al., 1997	99	77
Central Lampung, Southern Sumatra	Indonesia	1.08	5	1994.12-1995.4	short	CF	no	0	20.2	37.4	Nugroho et al., 1997	99	77
Central Lampung, Southern Sumatra	Indonesia	1.3	5.1	1994.12-1995.3	short	CF	straw_on_season	5	27.7	51.3	Nugroho et al., 1997	91	77
Central Lampung, Southern Sumatra	Indonesia	1.3	5.1	1994.12-1995.4	short	CF	straw_on_season	5	31.6	63.7	Nugroho et al., 1997	104	84
Central Lampung, Southern Sumatra	Indonesia	1.3	5.1	1994.12-1995.4	short	CF	straw_on_season	5	31.3	57.8	Nugroho et al., 1997	99	77
Central Lampung, Southern Sumatra	Indonesia	1.3	5.1	1994.12-1995.4	short	CF	straw_on_season	5	32.3	59.7	Nugroho et al., 1997	104	77
Central Lampung, Southern Sumatra	Indonesia	1.3	5.1	1994.12-1995.4	short	CF	straw_on_season	5	35	64.6	Nugroho et al., 1997	99	77
Central Lampung, Southern Sumatra	Indonesia	1.3	5.1	1994.12-1995.4	short	CF	straw_on_season	5	31	57.3	Nugroho et al., 1997	99	77
Central Lampung, Southern Sumatra	Indonesia	1.3	5.1	1994.12-1995.4	short	CF	straw_on_season	5	31.8	58.8	Nugroho et al., 1997	99	77
Central Lampung, Southern Sumatra	Indonesia	0.99	5	1993.12-1994.3	short	CF	no	0	16.6	30.8	Lumbanraja et al., 1998	94	77
Central Lampung, Southern Sumatra	Indonesia	0.99	5	1993.12-1994.3	short	CF	straw_on_season	5	23.4	43.2	Lumbanraja et al., 1998	94	77
Central Lampung, Southern Sumatra	Indonesia	1.48	5.2	1993.12-1994.3	short	CF	no	0	28.9	53.4	Lumbanraja et al., 1998	93	77
Central Lampung, Southern Sumatra	Indonesia	1.48	5.2	1993.12-1994.3	short	CF	straw_on_season	5	39	72.2	Lumbanraja et al., 1998	93	77
Central Lampung, Southern Sumatra	Indonesia	0.48	4.8	1993.12-1994.3	short	CF	no	0	23.8	44.1	Lumbanraja et al., 1998	95	77
Central Lampung, Southern Sumatra	Indonesia	0.48	4.8	1993.12-1994.3	short	CF	straw_on_season	5	33.4	61.8	Lumbanraja et al., 1998	95	77
Central Lampung, Southern Sumatra	Indonesia	0.98	4.9	1993.4-1993.7	flooded	MD	no	0	21.3178	44	Nugroho et al., 1994b	86	77
Central Lampung, Southern Sumatra	Indonesia	1.23	5	1993.4-1993.7	flooded	MD	no	0	20.3004	41.9	Nugroho et al., 1994b	86	77
Central Lampung, Southern Sumatra	Indonesia	1.05	4.7	1993.4-1993.7	flooded	MD	no	0	14.438	29.8	Nugroho et al., 1994b	86	77
Central Lampung, Southern Sumatra	Indonesia	1.11	4.8	1993.4-1993.7	flooded	MD	straw_on_season	5	20.9787	43.3	Nugroho et al., 1994b	86	77
Central Lampung, Southern Sumatra	Indonesia	1.04	4.9	1993.4-1993.7	flooded	MD	GM	5	20.5911	42.5	Nugroho et al., 1994b	86	77
Central Lampung, Southern Sumatra	Indonesia	1.1	4.7	1993.4-1993.7	flooded	MD	FYM	5	22.7229	46.9	Nugroho et al., 1994b	86	77
Central Lampung, Southern Sumatra	Indonesia	1.63	7.6	1993.12-1994.3	short	CF	no	0	11.9	22.1	Lumbanraja et al., 1998	94	77
Central Lampung, Southern Sumatra	Indonesia	1.63	7.6	1993.12-1994.3	short	CF	straw_on_season	5	14.4	26.7	Lumbanraja et al., 1998	94	77
Central Lampung, Southern Sumatra	Indonesia	1.1	5	1993.12-1994.3	short	RFW	no	0	11.7	21.6	Lumbanraja et al., 1997	98
Central Lampung, Southern Sumatra	Indonesia	1.1	5	1993.12-1994.3	short	RFW	straw_on_season	5	17	31.4	Lumbanraja et al., 1997	98
Central Lampung, Southern Sumatra	Indonesia	1.1	5	1994.12-1995.3	short	RFW	no	0	13.6	22.9	Lumbanraja et al., 1997	97
Central Lampung, Southern Sumatra	Indonesia	1.1	5	1994.12-1995.3	short	RFW	straw_on_season	5	18.4	30.8	Lumbanraja et al., 1997	97
Jakenan, Cental Java	Indonesia	0.48	4.7	1993.10-1994.2	short	CF	no	0	6.91667	22.9	Setyanto et al., 2000	119
Jakenan, Cental Java	Indonesia	0.48	4.7	1993.10-1994.2	short	CF	no	0	6.33333	25.6	Setyanto et al., 2000	119
Jakenan, Cental Java	Indonesia	0.48	4.7	1994.3-1994.6	flooded	CF	no	0	5.58333	14.1	Setyanto et al., 2000	103
Jakenan, Cental Java	Indonesia	0.48	4.7	1994.3-1994.5	flooded	CF	no	0	6.79167	11.5	Setyanto et al., 2000	86
Jakenan, Cental Java	Indonesia	0.48	4.7	1995.1-1994.4	short	CF	no	0	5.16667	10.5	Setyanto et al., 2000	92
Jakenan, Cental Java	Indonesia	0.48	4.7	1995.11-1996.2	short	CF	no	0	3.375	8.7	Setyanto et al., 2000	82
Jakenan, Cental Java	Indonesia	0.48	4.7	1996.2-1996.5	flooded	CF	no	0	7.66667	16.6	Setyanto et al., 2000	85
Jakenan, Cental Java	Indonesia	0.48	4.7	1996.10-1997.2	short	CF	no	0	7.125	17	Setyanto et al., 2000	97
Jakenan, Cental Java	Indonesia	0.48	4.7	1996.10-1997.2	short	CF	no	0	4.375	10.4	Setyanto et al., 2000	97
Jakenan, Cental Java	Indonesia	0.48	4.7	1997.2-1997.5	flooded	CF	no	0	9.04167	18.1	Setyanto et al., 2000	84
Jakenan, Cental Java	Indonesia	0.48	4.7	1997.2-1997.5	flooded	CF	no	0	8.20833	16.3	Setyanto et al., 2000	84
Jakenan, Cental Java	Indonesia	0.48	4.7	1997.12-1998.3	short	CF	no	0	4.58333	10.1	Setyanto et al., 2000	91
Jakenan, Cental Java	Indonesia	0.48	4.7	1997.12-1998.3	short	CF	no	0	5.5	12.8	Setyanto et al., 2000	97
Jakenan, Cental Java	Indonesia	0.48	4.7	1997.12-1998.3	short	CF	no	0	5.54167	13.7	Setyanto et al., 2000	103
Jakenan, Cental Java	Indonesia	0.48	4.7	1997.12-1998.4	short	CF	no	0	4.70833	13.2	Setyanto et al., 2000	126
Jakenan, Cental Java	Indonesia	0.48	4.7	1998.5-1998.8	flooded	CF	no	0	2.95833	5.2	Setyanto et al., 2000	75
Jakenan, Cental Java	Indonesia	0.48	4.7	1998.5-1998.8	flooded	CF	no	0	4.16667	8.1	Setyanto et al., 2000	82
Jakenan, Cental Java	Indonesia	0.48	4.7	1998.5-1998.8	flooded	CF	no	0	4.91667	9.7	Setyanto et al., 2000	83
Jakenan, Cental Java	Indonesia	0.48	4.7	1998.5-1998.9	flooded	CF	no	0	5.04167	11.6	Setyanto et al., 2000	97
Jakenan, Cental Java	Indonesia	0.48	4.7	1993.10-1994.2	short	RFW	no	0	1.16667	5.9	Setyanto et al., 2000	137
Jakenan, Cental Java	Indonesia	0.48	4.7	1993.10-1994.2	short	RFW	no	0	0.791667	2.6	Setyanto et al., 2000	137
Jakenan, Cental Java	Indonesia	0.48	4.7	1994.3-1994.5	flooded	RFD	no	0	3.75	7.7	Setyanto et al., 2000	86
Jakenan, Cental Java	Indonesia	0.48	4.7	1994.3-1994.5	flooded	RFD	no	0	2.75	6.9	Setyanto et al., 2000	86
Jakenan, Cental Java	Indonesia	0.48	4.7	1994.11-1995.3	short	RFW	no	0	2.625	7.5	Setyanto et al., 2000	121
Jakenan, Cental Java	Indonesia	0.48	4.7	1995.10-1996.2	short	RFW	no	0	2.16667	5.6	Setyanto et al., 2000	114
Jakenan, Cental Java	Indonesia	0.48	4.7	1996.2-1996.5	flooded	RFD	no	0	2.45833	5.3	Setyanto et al., 2000	86
Jakenan, Cental Java	Indonesia	0.48	4.7	1996.10-1997.2	short	RFW	no	0	1.33333	3.7	Setyanto et al., 2000	116
Jakenan, Cental Java	Indonesia	0.48	4.7	1996.10-1997.2	short	RFW	no	0	1.625	4.5	Setyanto et al., 2000	116
Jakenan, Cental Java	Indonesia	0.48	4.7	1997.2-1997.5	flooded	RFD	no	0	4.41667	8.8	Setyanto et al., 2000	84
Jakenan, Cental Java	Indonesia	0.48	4.7	1997.2-1997.5	flooded	RFD	no	0	5.125	10.2	Setyanto et al., 2000	84
Tabanan, Bali	Indonesia	1.2	6.7	1994.10-1995.1	Unknown	CF	no	0	3.25333	6	Subadiyasa et al., 1997	109	84
Tabanan, Bali	Indonesia	1.2	6.7	1994.10-1995.1	Unknown	CF	no	0	3.09333	5.57333	Subadiyasa et al., 1997	109	84
Tabanan, Bali	Indonesia	1.2	6.7	1994.10-1995.1	Unknown	CF	straw_on_season	5	5.84	9.28	Subadiyasa et al., 1997	109	84
Tabanan, Bali	Indonesia	1.2	6.7	1994.10-1995.1	Unknown	CF	straw_on_season	5	8.4	14	Subadiyasa et al., 1997	109	84
Tabanan, Bali	Indonesia	1.2	6.7	1994.10-1995.1	Unknown	CF	no	0	3.57333	6.42667	Subadiyasa et al., 1997	109	84
Tabanan, Bali	Indonesia	1.2	6.7	1994.10-1995.1	Unknown	CF	no	0	4.42667	7.73333	Subadiyasa et al., 1997	109	84
Tabanan, Bali	Indonesia	1.2	6.7	1994.10-1995.1	Unknown	CF	straw_on_season	5	5.57333	9.18667	Subadiyasa et al., 1997	109	84
Tabanan, Bali	Indonesia	1.2	6.7	1994.10-1995.1	Unknown	CF	straw_on_season	5	8.46667	14.24	Subadiyasa et al., 1997	109	84
Gianyar, Bali	Indonesia	2.6	6.3	1994.2-1994.6	Unknown	CF	no	0	2.69	4.29	Subadiyasa et al., 1997	106	77
Gianyar, Bali	Indonesia	2.6	6.3	1994.2-1994.6	Unknown	CF	no	0	2.65	4.23	Subadiyasa et al., 1997	106	77
Gianyar, Bali	Indonesia	2.6	6.3	1994.2-1994.6	Unknown	CF	straw_on_season	5	3.32	5.14	Subadiyasa et al., 1997	106	77
Gianyar, Bali	Indonesia	2.6	6.3	1994.2-1994.6	Unknown	CF	straw_on_season	5	4.3	6.87	Subadiyasa et al., 1997	106	77
Gianyar, Bali	Indonesia	2.6	6.3	1994.2-1994.6	Unknown	CF	no	0	2.73	4.35	Subadiyasa et al., 1997	106	77
Gianyar, Bali	Indonesia	2.6	6.3	1994.2-1994.6	Unknown	CF	no	0	2.82	4.45	Subadiyasa et al., 1997	106	77
Gianyar, Bali	Indonesia	2.6	6.3	1994.2-1994.6	Unknown	CF	straw_on_season	5	4.4	7.05	Subadiyasa et al., 1997	106	77
Gianyar, Bali	Indonesia	2.6	6.3	1994.2-1994.6	Unknown	CF	straw_on_season	5	4.05	6.32	Subadiyasa et al., 1997	106	77
Gianyar, Bali	Indonesia	1.5	6.4	1994.10-1995.1	Unknown	CF	no	0	2.26667	4.29333	Subadiyasa et al., 1997	109	84
Gianyar, Bali	Indonesia	1.5	6.4	1994.10-1995.1	Unknown	CF	no	0	1.69333	3.45333	Subadiyasa et al., 1997	109	84
Gianyar, Bali	Indonesia	1.5	6.4	1994.10-1995.1	Unknown	CF	straw_on_season	5	3.34667	6.18667	Subadiyasa et al., 1997	109	84
Gianyar, Bali	Indonesia	1.5	6.4	1994.10-1995.1	Unknown	CF	straw_on_season	5	2.85333	5.26667	Subadiyasa et al., 1997	109	84
Gianyar, Bali	Indonesia	1.5	6.4	1994.10-1995.1	Unknown	CF	no	0	1.85333	3.53333	Subadiyasa et al., 1997	109	84
Gianyar, Bali	Indonesia	1.5	6.4	1994.10-1995.1	Unknown	CF	no	0	2.08	3.96	Subadiyasa et al., 1997	109	84
Gianyar, Bali	Indonesia	1.5	6.4	1994.10-1995.1	Unknown	CF	straw_on_season	5	4.82667	9.01333	Subadiyasa et al., 1997	109	84
Gianyar, Bali	Indonesia	1.5	6.4	1994.10-1995.1	Unknown	CF	straw_on_season	5	4	7.13333	Subadiyasa et al., 1997	109	84
PhilRice	Philippines	1.32	6.88	1994 dry	short	CF	straw_on_season	3	3.75	9.5	Corton et al., 2000	105
PhilRice	Philippines	1.32	6.88	1994 dry	short	CF	straw_on_season	3	2.66667	6.7	Corton et al., 2000	105
PhilRice	Philippines	1.32	6.88	1994 dry	short	CF	straw_on_season	3	3.08333	6.7	Corton et al., 2000	91
PhilRice	Philippines	1.32	6.88	1994 dry	short	CF	straw_on_season	3	4.75	10.4	Corton et al., 2000	91
PhilRice	Philippines	1.32	6.88	1994 wet	flooded	CF	straw_on_season	3	11.2083	26.6	Corton et al., 2000	99
PhilRice	Philippines	1.32	6.88	1994 wet	flooded	CF	straw_on_season	3	9.66667	23	Corton et al., 2000	99
PhilRice	Philippines	1.32	6.88	1994 wet	flooded	CF	straw_on_season	3	9.45833	22.5	Corton et al., 2000	99
PhilRice	Philippines	1.32	6.88	1994 wet	flooded	CF	straw_on_season	3	10.125	24.1	Corton et al., 2000	99
PhilRice	Philippines	1.32	6.88	1995 dry	short	CF	straw_on_season	3	7.66667	20.4	Corton et al., 2000	111
PhilRice	Philippines	1.32	6.88	1995 dry	short	CF	straw_on_season	3	6.91667	18.4	Corton et al., 2000	111
PhilRice	Philippines	1.32	6.88	1995 dry	short	CF	straw_on_season	3	8.54167	22.8	Corton et al., 2000	111
PhilRice	Philippines	1.32	6.88	1995 dry	short	CF	straw_on_season	3	5.45833	14.5	Corton et al., 2000	111
PhilRice	Philippines	1.32	6.88	1995 wet	flooded	CF	straw_on_season	3	20.9583	51.8	Corton et al., 2000	103
PhilRice	Philippines	1.32	6.88	1995 wet	flooded	CF	straw_on_season	3	13.2083	32.7	Corton et al., 2000	103
PhilRice	Philippines	1.32	6.88	1995 wet	flooded	CF	straw_on_season	3	21.5	53.1	Corton et al., 2000	103
PhilRice	Philippines	1.32	6.88	1995 wet	flooded	CF	straw_on_season	3	5.79167	14.3	Corton et al., 2000	103
PhilRice	Philippines	1.32	6.88	1996 dry	short	CF	straw_on_season	3	6.875	16	Corton et al., 2000	97
PhilRice	Philippines	1.32	6.88	1996 dry	short	CF	straw_on_season	7	18.0417	42	Corton et al., 2000	97
PhilRice	Philippines	1.32	6.88	1996 dry	short	CF	straw_on_season	4.5	7.66667	17.8	Corton et al., 2000	97
PhilRice	Philippines	1.32	6.88	1996 dry	short	CF	straw_on_season	7	13.25	30.8	Corton et al., 2000	97
PhilRice	Philippines	1.32	6.88	1996 wet	flooded	CF	straw_on_season	3	11.3333	27.2	Corton et al., 2000	100
PhilRice	Philippines	1.32	6.88	1996 wet	flooded	CF	straw_on_season	7	39.6667	95.2	Corton et al., 2000	100
PhilRice	Philippines	1.32	6.88	1996 wet	flooded	CF	straw_on_season	4.5	10.5417	35.3	Corton et al., 2000	100
PhilRice	Philippines	1.32	6.88	1996 wet	flooded	CF	straw_on_season	7	24.9583	59.9	Corton et al., 2000	100
PhilRice	Philippines	1.32	6.88	1997 dry	short	CF	Compost	0.3	3.79167	8.9	Corton et al., 2000	98
PhilRice	Philippines	1.32	6.88	1997 dry	short	CF	Compost	0.3	3.04167	7.5	Corton et al., 2000	91
PhilRice	Philippines	1.32	6.88	1997 wet	flooded	CF	straw_on_season	3	15.625	34.8	Corton et al., 2000	93
PhilRice	Philippines	1.32	6.88	1997 wet	flooded	CF	straw_on_season	3	13.4583	27.2	Corton et al., 2000	84
PhilRice	Philippines	1.32	6.88	1998 dry	short	CF	straw_on_season	3	3.29167	9	Corton et al., 2000	114
PhilRice	Philippines	1.32	6.88	1998 dry	short	CF	straw_on_season	3.5	3.33333	9.1	Corton et al., 2000	114
PhilRice	Philippines	1.32	6.88	1997 dry	short	SD	Compost	0.3	2.16667	5.1	Corton et al., 2000	98
PhilRice	Philippines	1.32	6.88	1997 dry	short	SD	Compost	0.3	1.91667	4.8	Corton et al., 2000	91
PhilRice	Philippines	1.32	6.88	1997 wet	flooded	SD	straw_on_season	3	14.4583	32.3	Corton et al., 2000	93
PhilRice	Philippines	1.32	6.88	1997 wet	flooded	SD	straw_on_season	3	7.41667	15	Corton et al., 2000	84
IRRI	Philippines	1.97	5.9	1992.7-1992.11	Unknown	Unknown	GM	20	18.5	43.068	Denier van der Gon and Neue, 1994	103	97
IRRI	Philippines	1.97	5.9	1992.7-1992.11	Unknown	Unknown	no	0	3.35052	7.8	Denier van der Gon and Neue, 1994	103	97
IRRI	Philippines	1.97	5.9	1992.7-1992.11	Unknown	Unknown	no	0	3.13574	7.3	Denier van der Gon and Neue, 1994	103	97
IRRI	Philippines	1.97	5.9	1992.1-1992.5	Unknown	CF	no	0	6.89103	17.2	Denier van der Gon and Neue, 1995	108	104
IRRI	Philippines	1.97	5.9	1992.1-1992.5	Unknown	CF	GM	20	34.8958	87.1	Denier van der Gon and Neue, 1995	108	104
IRRI	Philippines	1.97	5.9	1992.7-1992.11	Unknown	CF	no	0	3.16506	7.9	Denier van der Gon and Neue, 1995	108	104
IRRI	Philippines	1.97	5.9	1992.7-1992.11	Unknown	CF	GM	11	8.25321	20.6	Denier van der Gon and Neue, 1995	108	104
IRRI	Philippines	1.97	5.9	1992.7-1992.11	Unknown	CF	GM	20	17.7484	44.3	Denier van der Gon and Neue, 1995	108	104
IRRI	Philippines	1.97	5.9	1992.7-1992.11	Unknown	CF	GM	31	15.5849	38.9	Denier van der Gon and Neue, 1995	108	104
IRRI	Philippines	1.2	6.6	1994 wet (7-10)	short	CF	no	0	1.125	2.7	Wassmann et al., 2000	100	111
IRRI	Philippines	1.2	6.6	1996 wet (7-10)	short	CF	no	0	0.583333	1.4	Wassmann et al., 2000	100	100
IRRI	Philippines	1.2	6.6	1994 wet (7-10)	short	CF	no	0	1.45833	3.5	Wassmann et al., 2000	100	111
IRRI	Philippines	1.2	6.6	1994 wet (7-10)	short	RFW	no	0	0.458333	1.1	Wassmann et al., 2000	100	111
IRRI	Philippines	1.2	6.6	1995 dry (1-4)	short	RFD	no	0	0.333333	0.8	Wassmann et al., 2000	95	96
IRRI	Philippines	1.2	6.6	1995 dry (1-4)	short	RFD	no	0	0.291667	0.7	Wassmann et al., 2000	95	87
IRRI	Philippines	1.2	6.6	1995 dry (1-4)	short	RFD	no	0	0.25	0.5	Wassmann et al., 2000	95	87
IRRI	Philippines	1.2	6.6	1995 wet (6-10)	short	RFW	no	0	0.333333	0.8	Wassmann et al., 2000	129	131
IRRI	Philippines	1.2	6.6	1995 wet (6-10)	short	RFW	no	0	0.25	0.6	Wassmann et al., 2000	121	123
IRRI	Philippines	1.2	6.6	1995 wet (6-10)	short	RFW	no	0	0.25	0.6	Wassmann et al., 2000	121	123
IRRI	Philippines	1.2	6.6	1995 wet (6-10)	short	RFW	no	0	0.166667	0.4	Wassmann et al., 2000	121	123
IRRI	Philippines	1.2	6.6	1997 dry (1-4)	short	RFD	no	0	1.125	2.7	Wassmann et al., 2000	100	101
IRRI	Philippines	1.2	6.6	1997 dry (1-4)	short	RFD	no	0	0.375	0.9	Wassmann et al., 2000	100	101
IRRI	Philippines	1.2	6.6	1997 wet (7-10)	short	RFW	no	0	0.583333	1.3	Wassmann et al., 2000	100	98
IRRI	Philippines	1.2	6.6	1997 wet (7-10)	short	RFW	no	0	0.291667	0.7	Wassmann et al., 2000	100	98
IRRI	Philippines	1.69	6.4	1993 dry	short	SD	no	0	0.4004	1.06667	Bronson et al., 1997	111	111
IRRI	Philippines	1.69	6.4	1993 dry	short	SD	no	0	0.1001	0.266667	Bronson et al., 1997	111	111
IRRI	Philippines	1.69	6.4	1993 dry	short	SD	GM	12	3.7037	9.86667	Bronson et al., 1997	111	111
IRRI	Philippines	1.69	6.4	1993 dry	short	SD	straw_on_season	5.5	8.20821	21.8667	Bronson et al., 1997	111	111
IRRI	Philippines	1.69	6.4	1993 wet	short	CF	no	0	1.53061	3.6	Bronson et al., 1997	98	98
IRRI	Philippines	1.69	6.4	1993 wet	short	CF	no	0	0.566752	1.333	Bronson et al., 1997	98	98
IRRI	Philippines	1.69	6.4	1993 wet	short	CF	GM	12	10.3189	24.27	Bronson et al., 1997	98	98
IRRI	Philippines	1.69	6.4	1993 wet	short	CF	straw_on_season	5.5	16.6114	39.07	Bronson et al., 1997	98	98
IRRI	Philippines	1.69	6.4	1994 dry	short	CF	no	0	0.743127	1.73	Bronson et al., 1997	97	97
IRRI	Philippines	1.69	6.4	1994 dry	short	CF	straw_on_season	5.5	15.9235	37.07	Bronson et al., 1997	97	97
IRRI	Philippines	1.69	6.4	1994 dry	short	SD	no	0	0.286512	0.667	Bronson et al., 1997	97	97
IRRI	Philippines	1.69	6.4	1994 dry	short	SD	straw_on_season	5.5	9.10653	21.2	Bronson et al., 1997	97	97
Ratchaburi	Thailand	1.02	7.1	1992.8-1992.11	Unknown	CF	no	0	2.32804	5.86667	Jermsawatdipong et al., 1994	105
Ratchaburi	Thailand	1.02	7.1	1992.8-1992.11	Unknown	CF	no	0	5.34392	13.4667	Jermsawatdipong et al., 1994	105
Ratchaburi	Thailand	1.02	7.1	1992.8-1992.11	Unknown	CF	GM	30	31.164	78.5333	Jermsawatdipong et al., 1994	105
Prachinburi	Thailand	1.11949	3.93	1994.6-1994.10	Unknown	DW	no	0	3.625	20.1	Chareonsilp et al., 2000	150
Prachinburi	Thailand	1.11949	3.93	1994.6-1994.10	Unknown	DW	no	0	3.5	19.4	Chareonsilp et al., 2000	150
Prachinburi	Thailand	1.11949	3.93	1994.6-1994.10	Unknown	DW	no	0	3.83333	21.3	Chareonsilp et al., 2000	150
Prachinburi	Thailand	1.11949	3.93	1995.6-1995.10	Unknown	DW	no	0	1	4.8	Chareonsilp et al., 2000	150
Prachinburi	Thailand	1.11949	3.93	1995.6-1995.10	Unknown	DW	no	0	1.375	6.7	Chareonsilp et al., 2000	150
Prachinburi	Thailand	1.11949	3.93	1996.6-1996.10	Unknown	DW	no	0	1.45833	6.9	Chareonsilp et al., 2000	150
Prachinburi	Thailand	1.11949	3.93	1997.6-1997.10	Unknown	DW	no	0	1.33333	6	Chareonsilp et al., 2000	150
Surin	Thailand	0.1	4.7	1992.8-1992.11	Unknown	CF	no	0	15.4762	41.6	Jermsawatdipong et al., 1994	112
Surin	Thailand	0.1	4.7	1992.8-1992.11	Unknown	CF	no	0	17.3115	46.5333	Jermsawatdipong et al., 1994	112
Surin	Thailand	0.1	4.7	1992.8-1992.11	Unknown	CF	straw_on_season	3.1	10.6151	28.5333	Jermsawatdipong et al., 1994	112
Iksan	South Korea	1.63573	6	June-Oct.	Unknown	MD	no	0	8	24.384	Lee et al., 2000	127	127
Iksan	South Korea	1.63573	6	June-Oct.	Unknown	MD	no	0	6.875	20.955	Lee et al., 2000	127	127
Iksan	South Korea	1.63573	6	June-Oct.	Unknown	MD	no	0	7.45833	22.733	Lee et al., 2000	127	127
Iksan	South Korea	1.63573	6	June-Oct.	Unknown	MD	straw_off_season	5	11.0417	33.655	Lee et al., 2000	127	127
Iksan	South Korea	1.63573	6	June-Oct.	Unknown	MD	straw_off_season	5	8.625	26.289	Lee et al., 2000	127	127
Iksan	South Korea	1.63573	6	June-Oct.	Unknown	MD	straw_off_season	5	13.25	40.386	Lee et al., 2000	127	127
Iksan	South Korea	1.35151	5.8	June-Oct., 1997	Unknown	MD	no	0	8.25	25.938	Lee et al., 1999	131	119
Iksan	South Korea	1.35151	5.8	June-Oct., 1997	Unknown	MD	no	0	11.2083	35.239	Lee et al., 1999	131	119
Iksan	South Korea	1.35151	5.8	June-Oct., 1997	Unknown	MD	no	0	11.375	35.763	Lee et al., 1999	131	119
Iksan	South Korea	1.35151	5.8	June-Oct., 1997	Unknown	MD	straw_on_season	5	16.4583	51.745	Lee et al., 1999	131	119
Iksan	South Korea	1.35151	5.8	June-Oct., 1997	Unknown	MD	straw_on_season	5	16.9583	53.317	Lee et al., 1999	131	119
Iksan	South Korea	1.35151	5.8	June-Oct., 1997	Unknown	MD	straw_on_season	5	17.125	53.841	Lee et al., 1999	131	119
Iksan	South Korea	1.33411	6.1	June-Sept.	Unknown	CF	no	0	7.29167	20.125	Lee et al., 1997a	115	99
Iksan	South Korea	1.33411	6.1	June-Sept.	Unknown	CF	no	0	14.25	39.33	Lee et al., 1997a	115	99
Iksan	South Korea	1.33411	6.1	June-Sept.	Unknown	CF	no	0	16.25	44.85	Lee et al., 1997a	115	99
Iksan	South Korea	1.33411	6.1	June-Sept.	Unknown	CF	straw_on_season	5	10.2917	28.405	Lee et al., 1997a	115	99
Iksan	South Korea	1.33411	6.1	June-Sept.	Unknown	CF	straw_on_season	5	21.9167	60.49	Lee et al., 1997a	115	99
Iksan	South Korea	1.33411	6.1	June-Sept.	Unknown	CF	straw_on_season	5	24.0417	66.355	Lee et al., 1997a	115	99
Suwon	South Korea	1	5.9	1997.6-1997.10	Unknown	MD	straw_on_season	5	13.75	42.9	Shin and Yun, 2000	130	120
Suwon	South Korea	1	5.9	1997.6-1997.10	Unknown	MD	straw_on_season	5	12.4167	37	Shin and Yun, 2000	124	120
Suwon	South Korea	1	5.9	1997.6-1997.10	Unknown	MD	straw_on_season	5	15.7917	47.7	Shin and Yun, 2000	126	120
Suwon	South Korea	1	5.9	1997.6-1997.10	Unknown	MD	straw_on_season	5	16.2917	50.9	Shin and Yun, 2000	130	120
Suwon	South Korea	1	5.9	1997.6-1997.10	Unknown	MD	straw_on_season	5	20.0833	59.7	Shin and Yun, 2000	124	120
Suwon	South Korea	1	5.9	1997.6-1997.10	Unknown	MD	straw_on_season	5	18.8333	58.8	Shin and Yun, 2000	130	120
Suwon	South Korea	1	5.9	1997.6-1997.10	Unknown	MD	straw_on_season	5	23.5833	62.9	Shin and Yun, 2000	111	120
Suwon	South Korea	1	5.9	1997.6-1997.10	Unknown	MD	straw_on_season	5	25.125	76	Shin and Yun, 2000	126	120
Chiayi, Taiwan	China	1.32	7.1	2000.2-2000.6	Unknown	Unknown	no	0	1.47	4.55112	Liou et al., 2003a	129
Chiayi, Taiwan	China	1.28	7.3	2000.2-2000.6	Unknown	Unknown	no	0	1.27	3.93192	Liou et al., 2003a	129
Chiayi, Taiwan	China	1.46	6.8	2000.2-2000.6	Unknown	Unknown	straw_on_season	9.8	1.79	5.54184	Liou et al., 2003a	129
Chiayi, Taiwan	China	1.24	7.4	2000.7-2000.11	flooded	CF	no	0	11.94	34.3872	Liou et al., 2003a	120
Chiayi, Taiwan	China	1.31	7.2	2000.7-2000.11	flooded	CF	no	0	14.07	40.5216	Liou et al., 2003a	120
Chiayi, Taiwan	China	1.91	7.1	2000.7-2000.11	flooded	CF	straw_on_season	9.8	27.15	78.192	Liou et al., 2003a	120
Taoyuan, Taiwan	China	2.84	5.7	1994.8-1994.12	flooded	MD	no	0	4	10.56	Yang and Chang, 2001	122
Taoyuan, Taiwan	China	2.84	5.7	1994.8-1994.12	flooded	MD	GM	37	10.46	30.12	Yang and Chang, 2001	122
Taoyuan, Taiwan	China	2.84	5.7	1995.2-1995.6	short	MD	no	0	0.52	1.73	Yang and Chang, 2001	126
Taoyuan, Taiwan	China	2.84	5.7	1995.2-1995.6	short	MD	no	0	1.65	5.55	Yang and Chang, 2001	133
Taoyuan, Taiwan	China	2.84	5.7	1995.8-1995.12	flooded	MD	no	0	4.16	10.54	Yang and Chang, 2001	117
Taoyuan, Taiwan	China	2.84	5.7	1995.8-1995.12	flooded	MD	GM	25	5.68	14.43	Yang and Chang, 2001	117
Taoyuan, Taiwan	China	2.84	5.7	1996.2-1996.6	short	MD	no	0	1.56	5.23	Yang and Chang, 2001	152
Taibei, Taiwan	China	2.84	5.6	1994.8-1994.12	flooded	MD	no	0	4.85	13.73	Yang and Chang, 2001	147
Taibei, Taiwan	China	2.84	5.6	1995.2-1995.6	short	MD	no	0	0.76	2.55	Yang and Chang, 2001	129
Taibei, Taiwan	China	2.84	5.6	1995.8-1995.12	flooded	CF	no	0	9.54	28.85	Yang and Chang, 2001	136
Taibei, Taiwan	China	2.84	5.6	1996.2-1996.6	short	MD	no	0	3.48	11.7	Yang and Chang, 2001	152
Taibei, Taiwan	China	2.84	5.6	1996.2-1996.6	short	CF	no	0	9.72	32.7	Yang and Chang, 2001	152
Langyang, Taiwan	China	2.96	6	1994.8-1994.12	flooded	MD	no	0	8.93	24.64	Yang and Chang, 2001	136
Langyang, Taiwan	China	2.96	6	1995.2-1995.6	short	MD	no	0	0.87	2.92	Yang and Chang, 2001	134
Tzawchyau, Taiwan	China	3.24	5.4	1994.8-1994.12	flooded	MD	no	0	13.72	39.5	Yang and Chang, 2001	123
Tzawchyau, Taiwan	China	3.24	5.4	1995.2-1995.6	short	MD	no	0	2.92	9.82	Yang and Chang, 2001	130
Gadakujang, Odisha	India	0.101	5.95		short	CF	no	0	4.30104	12.387	Datta et al., 2013		120
Gadakujang, Odisha	India	0.101	5.95		short	CF	no	0	5.91875	17.046	Datta et al., 2013		120
Gadakujang, Odisha	India	0.101	5.95		short	CF	GM	5	4.54826	13.099	Datta et al., 2013		120
Gadakujang, Odisha	India	0.101	5.95		short	CF	GM	5	4.14965	11.951	Datta et al., 2013		120
Gadakujang, Odisha	India	0.101	5.95		short	CF	FYM	5	6.07708	17.502	Datta et al., 2013		120
Gadakujang, Odisha	India	0.101	5.95		short	CF	no	0	9.15278	26.36	Datta et al., 2013		120
Gadakujang, Odisha	India	0.101	5.95		short	CF	no	0	0.673246	1.535	Datta et al., 2013		95
Gadakujang, Odisha	India	0.101	5.95		short	CF	no	0	0.88114	2.009	Datta et al., 2013		95
Gadakujang, Odisha	India	0.101	5.95		short	CF	GM	5	4.42456	10.088	Datta et al., 2013		95
Gadakujang, Odisha	India	0.101	5.95		short	CF	GM	5	0.999123	2.278	Datta et al., 2013		95
Gadakujang, Odisha	India	0.101	5.95		short	CF	FYM	5	3.67193	8.372	Datta et al., 2013		95
Gadakujang, Odisha	India	0.101	5.95		short	CF	no	0	2.04254	4.657	Datta et al., 2013		95
Thanh Tri district, Hanoi	Vietnam	0.163	5.7	2013.2-2013.6	Unknown	SD	no	0	1.67749	3.1	Pandey et al., 2014	98	77
Thanh Tri district, Hanoi	Vietnam	0.163	5.7	2013.2-2013.6	Unknown	SD	FYM	10	5.68182	10.5	Pandey et al., 2014	98	77
Thanh Tri district, Hanoi	Vietnam	0.163	5.7	2013.2-2013.6	Unknown	SD	Compost	11.21	4.27489	7.9	Pandey et al., 2014	98	77
Thanh Tri district, Hanoi	Vietnam	0.163	5.7	2013.2-2013.6	Unknown	CF	no	0	5.84416	10.8	Pandey et al., 2014	98	77
Thanh Tri district, Hanoi	Vietnam	0.163	5.7	2013.2-2013.6	Unknown	CF	FYM	10	19.1017	35.3	Pandey et al., 2014	98	77
Thanh Tri district, Hanoi	Vietnam	0.163	5.7	2013.2-2013.6	Unknown	CF	Compost	11.21	13.6364	25.2	Pandey et al., 2014	98	77
Los Baños, Calabarzon	Philippines	1.8	6.6	2011.6-2011.10	short	CF	no	0	9.50292	26	Sander et al., 2014		114
Los Baños, Calabarzon	Philippines	1.8	6.6	2011.6-2011.10	short	CF	straw_on_season	5	20.1023	55	Sander et al., 2014		114
Los Baños, Calabarzon	Philippines	1.8	6.6	2012.1-2012.4	short	CF	no	0	5.95238	17	Sander et al., 2014		119
Los Baños, Calabarzon	Philippines	1.8	6.6	2012.1-2012.4	short	CF	straw_on_season	5	11.5546	33	Sander et al., 2014		119
Milyang, Gyeongsangnam-do	South Korea	2.34	5.98	2008.6-2008.10	Unknown	CF	no	0	13.5417	39	Lee et al., 2010		120
Milyang, Gyeongsangnam-do	South Korea	2.34	5.98	2008.6-2008.10	Unknown	CF	GM	10	18.0104	51.87	Lee et al., 2010		120
Milyang, Gyeongsangnam-do	South Korea	2.34	5.98	2008.6-2008.10	Unknown	CF	GM	20	26.5417	76.44	Lee et al., 2010		120
Milyang, Gyeongsangnam-do	South Korea	2.34	5.98	2008.6-2008.10	Unknown	CF	GM	40	47.8021	137.67	Lee et al., 2010		120
Jinju, Gyeongsangnam-do	South Korea	2.51	5.48	2008.5-2008.10	Unknown	CF	no	0	15.8194	45.56	Lee et al., 2012		120
Jinju, Gyeongsangnam-do	South Korea	2.51	5.48	2008.5-2008.10	Unknown	CF	GM	10	18.1667	52.32	Lee et al., 2012		120
Jinju, Gyeongsangnam-do	South Korea	2.51	5.48	2008.5-2008.10	Unknown	CF	GM	20	26.8611	77.36	Lee et al., 2012		120
Jinju, Gyeongsangnam-do	South Korea	2.51	5.48	2008.5-2008.10	Unknown	CF	GM	40	61.5208	177.18	Lee et al., 2012		120
Changshu, Suzhou	China	2.41	6.91	2009.6-2009.10	long	SD	straw_off_season	4	10.7257	30.89	Chen et al., 2011		120
Changshu, Suzhou	China	2.41	6.91	2009.6-2009.10	long	SD	straw_off_season	4	21.4861	61.88	Chen et al., 2011		120
Beijing	China	2.4	6.7	2001-2002	long	SD	no	0	0.174479	0.67	Kreye et al., 2007		160
Jurong, Zhenjiang	China	0.82	5.9	2012.6-2012.10	long	MD	no	0	0.936949	2.83333	Fan et al., 2016	126
Jurong, Zhenjiang	China	0.82	5.9	2012.6-2012.10	long	MD	no	0	0.551146	1.66667	Fan et al., 2016	126
Jurong, Zhenjiang	China	0.82	5.9	2012.6-2012.10	long	MD	straw_on_season	4.8	9.36949	28.3333	Fan et al., 2016	126
Jurong, Zhenjiang	China	0.82	5.9	2012.6-2012.10	long	MD	no	0	1.21252	3.66667	Fan et al., 2016	126
Suwon	South Korea	0.986	5.8	2008.5-2008.10	Unknown	CF	no	0	5.71429	19.2	Kim et al., 2014a		140
Suwon	South Korea	0.986	5.8	2008.5-2008.10	Unknown	CF	no	0	9.5744	32.17	Kim et al., 2014a		140
Suwon	South Korea	0.986	5.8	2008.5-2008.10	Unknown	CF	straw_on_season	5	18.5179	62.22	Kim et al., 2014a		140
Suwon	South Korea	0.986	5.8	2008.5-2008.10	Unknown	MD	no	0	2.8869	9.7	Kim et al., 2014a		140
Suwon	South Korea	0.986	5.8	2008.5-2008.10	Unknown	MD	no	0	5.40774	18.17	Kim et al., 2014a		140
Suwon	South Korea	0.986	5.8	2008.5-2008.10	Unknown	MD	straw_on_season	5	8.95536	30.09	Kim et al., 2014a		140
Yixing, Wuxi	China	1.26	6.23	2003-2005	long	MD	no	0	1.96	6.20256	Ma et al., 2007	132
Yixing, Wuxi	China	1.26	6.23	2003-2005	long	MD	no	0	1.40667	4.44592	Ma et al., 2007	132
Yixing, Wuxi	China	1.26	6.23	2003-2005	long	MD	no	0	1.75667	5.55688	Ma et al., 2007	132
Yixing, Wuxi	China	1.26	6.23	2003-2005	long	MD	straw_on_season	3.75	11.4967	36.2716	Ma et al., 2007	132
Yixing, Wuxi	China	1.26	6.23	2003-2005	long	MD	straw_on_season	3.75	11.1833	35.3863	Ma et al., 2007	132
Yixing, Wuxi	China	1.26	6.23	2003-2005	long	MD	straw_on_season	3.75	13.6967	43.2975	Ma et al., 2007	132
Jurong, Zhenjiang	China	0.82	5.9	2006.6-2006.10	long	MD	no	0	2.28175	6.9	Ma et al., 2008	126
Jurong, Zhenjiang	China	0.82	5.9	2006.6-2006.10	long	MD	straw_on_season	4.8	8.99471	27.2	Ma et al., 2008	126
Jurong, Zhenjiang	China	0.82	5.9	2006.6-2006.10	long	MD	straw_on_season	4.8	9.29233	28.1	Ma et al., 2008	126
Jurong, Zhenjiang	China	0.82	5.9	2006.6-2006.10	long	MD	straw_on_season	4.8	6.11772	18.5	Ma et al., 2008	126
Jurong, Zhenjiang	China	0.82	5.9	2006.6-2006.10	long	MD	straw_on_season	4.8	5.25794	15.9	Ma et al., 2008	126
New Delhi	India	0.46	8.1	2011-2013	long	CF	no	0	1.31466	3.66	Gupta et al., 2016	116
New Delhi	India	0.46	8.1	2011-2013	long	CF	no	0	1.40984	3.925	Gupta et al., 2016	116
New Delhi	India	0.46	8.1	2011-2013	long	MD	no	0	0.960848	2.675	Gupta et al., 2016	116
New Delhi	India	0.46	8.1	2011-2013	long	CF	no	0	1.2482	3.475	Gupta et al., 2016	116
New Delhi	India	0.45	8.1	1999-2000	long	CF	no	0	1.13764	2.43	Pathak et al., 2003		89
New Delhi	India	0.45	8.1	1999-2000	long	CF	no	0	1.31554	2.81	Pathak et al., 2003		89
New Delhi	India	0.45	8.1	1999-2000	long	CF	FYM	6	2.12547	4.54	Pathak et al., 2003		89
New Delhi	India	0.45	8.1	1999-2000	long	MD	no	0	0.388577	0.83	Pathak et al., 2003		89
New Delhi	India	0.45	8.1	1999-2000	long	MD	no	0	0.683521	1.46	Pathak et al., 2003		89
New Delhi	India	0.45	8.1	1999-2000	long	MD	FYM	6	1.29682	2.77	Pathak et al., 2003		89
Nanjing	China	1.3021	7.47	2013-2015	long	SD	no	0	3.15873	9.552	Hu et al., 2016	126
Nanjing	China	1.3021	7.47	2013-2015	long	SD	straw_on_season	5	7.64021	23.104	Hu et al., 2016	126
Nanjing	China	1.3021	7.47	2013-2015	long	SD	straw_on_season	5	7.01786	21.222	Hu et al., 2016	126
Nanjing	China	1.3021	7.47	2013-2015	long	SD	straw_on_season	5	6.88757	20.828	Hu et al., 2016	126
Kalasin province	Thailand	0.29	5.3	2004.7-2004.11	two	RFW	no	0	12.585	44.4	Kaewpradit et al., 2008	125	105
Kalasin province	Thailand	0.29	5.3	2004.7-2004.11	two	RFW	straw_off_season	5	12.8118	45.2	Kaewpradit et al., 2008	125	105
Kalasin province	Thailand	0.29	5.3	2004.7-2004.11	two	RFW	straw_off_season	5	13.322	47	Kaewpradit et al., 2008	125	105
Kalasin province	Thailand	0.29	5.3	2004.7-2004.11	two	RFW	straw_off_season	7.5	12.3299	43.5	Kaewpradit et al., 2008	125	105
Kalasin province	Thailand	0.29	5.3	2004.7-2004.11	two	RFW	straw_off_season	10	13.407	47.3	Kaewpradit et al., 2008	125	105
Mae Rim District, Chiang-Mai Province	Thailand	1.79	5.57	2013.8-2013.12	Unknown	RFW	no	0	20.3264	58.54	Kantachote et al., 2016	126	120
Ranot District, Songkhla Province	Thailand	1.1	5.05	2014.1-2014.4	Unknown	RFW	no	0	39.0217	86.16	Kantachote et al., 2016	93	92
Ibaraki	Japan	4.41	6	2003-2004	long	MD	straw_off_season	5.45	2.29167	7.15	Minamikawa and Sakai, 2006	130
Ibaraki	Japan	4.41	6	2003-2004	long	MD	no	0	2.07692	6.48	Minamikawa and Sakai, 2006	130
Ibaraki	Japan	4.41	6	2003-2004	long	CF	straw_off_season	5.45	5.91827	18.465	Minamikawa and Sakai, 2006	130
Ibaraki	Japan	4.41	6	2003-2004	long	CF	no	0	6.24519	19.485	Minamikawa and Sakai, 2006	130
Jurong, Zhenjiang	China	1.2	6.91	2007-2008	long	SD	no	0	1.3757	4.22616	Li et al., 2014	128
Jurong, Zhenjiang	China	1.2	6.91	2007-2008	long	SD	no	0	1.54102	4.734	Li et al., 2014	128
Jurong, Zhenjiang	China	1.2	6.91	2007-2008	long	SD	straw_on_season	3.75	8.97117	27.5594	Li et al., 2014	128
Jurong, Zhenjiang	China	1.2	6.91	2007-2008	long	SD	straw_on_season	3.75	11.4996	35.3267	Li et al., 2014	128
Jurong, Zhenjiang	China	1.2	6.91	2008	long	SD	no	0	0.85	2.7132	Li et al., 2014	133
Jurong, Zhenjiang	China	1.2	6.91	2008	long	SD	straw_on_season	3.75	6.84	21.8333	Li et al., 2014	133
Jurong, Zhenjiang	China	1.15	6.9	2010-2012	long	MD	no	0	0.802951	2.46667	Liu et al., 2015	128
Jurong, Zhenjiang	China	1.15	6.9	2010-2012	long	MD	straw_on_season	4.8	7.1072	21.8333	Liu et al., 2015	128
Jingzhou	China	1.825	7.84	2011.6-2012.9	long	SD	no	0	3.57831	9.01733	Liu et al., 2016	105
Jingzhou	China	1.825	7.84	2011.6-2012.9	long	SD	no	0	4.09788	10.3267	Liu et al., 2016	105
Jingzhou	China	1.825	7.84	2011.6-2012.9	long	SD	no	0	4.11058	10.3587	Liu et al., 2016	105
Jingzhou	China	1.825	7.84	2011.6-2012.9	long	SD	straw_on_season	8.65	17.3868	43.8147	Liu et al., 2016	105
Ludhiana	India	0.46	7.4	2005-2006	Unknown	CF	GM	20	5.645	14.6318	Khosa et al., 2010		108
Ludhiana	India	0.46	7.4	2005-2006	Unknown	CF	Compost	10	1.695	4.39344	Khosa et al., 2010		108
Ludhiana	India	0.46	7.4	2005-2006	Unknown	CF	straw_on_season	10	12.59	32.6333	Khosa et al., 2010		108
Ludhiana	India	0.46	7.4	2005-2006	Unknown	CF	FYM	20	7.07	18.3254	Khosa et al., 2010		108
Ludhiana	India	0.46	7.4	2005-2006	Unknown	CF	no	0	0.88	2.28096	Khosa et al., 2010		108
Ludhiana	India	0.46	7.4	2005-2006	Unknown	CF	GM	20	3.29	8.52768	Khosa et al., 2010		108
Ludhiana	India	0.46	7.4	2005-2006	Unknown	CF	Compost	10	1.455	3.77136	Khosa et al., 2010		108
Ludhiana	India	0.46	7.4	2005-2006	Unknown	CF	straw_on_season	10	9.415	24.4037	Khosa et al., 2010		108
Ludhiana	India	0.46	7.4	2005-2006	Unknown	CF	FYM	20	4.8	12.4416	Khosa et al., 2010		108
Ludhiana	India	0.46	7.4	2005-2006	Unknown	CF	no	0	0.83	2.15136	Khosa et al., 2010		108
Jinju	South Korea	1.1832	6.2	2011.6-2011.10	long	CF	no	0	6.47096	20.5	Haque et al., 2013	132
Jinju	South Korea	1.1832	6.2	2011.6-2011.10	long	CF	GM	9	11.5846	36.7	Haque et al., 2013	132
Jinju	South Korea	1.1832	6.2	2011.6-2011.10	long	CF	GM	18	30.3346	96.1	Haque et al., 2013	132
Jinju	South Korea	1.1832	6.2	2011.6-2011.10	long	CF	GM	27	40.0253	126.8	Haque et al., 2013	132
Jinju	South Korea	1.1832	6.2	2011.6-2011.10	long	CF	GM	36	46.2753	146.6	Haque et al., 2013	132
Jinju	South Korea	1.1832	6.2	2011-2012	long	CF	no	0	5.8125	16.6	Haque et al., 2015	124
Jinju	South Korea	1.1832	6.2	2011-2012	long	CF	GM	36	52.375	149.55	Haque et al., 2015	124
Jinju	South Korea	1.1832	6.2	2013.6-2013.10	long	CF	no	0	8.33333	24	Haque et al., 2016		120
Jinju	South Korea	1.1832	6.2	2013.6-2013.10	long	CF	GM	9	14.2361	41	Haque et al., 2016		120
Jinju	South Korea	1.1832	6.2	2013.6-2013.10	long	CF	GM	18	34.5486	99.5	Haque et al., 2016		120
Jinju	South Korea	1.1832	6.2	2013.6-2013.10	long	CF	GM	36	52.9514	152.5	Haque et al., 2016		120
Jinju	South Korea	1.1832	6.2	2013.6-2013.10	long	SD	no	0	4.86111	14	Haque et al., 2016		120
Jinju	South Korea	1.1832	6.2	2013.6-2013.10	long	SD	GM	9	8.15972	23.5	Haque et al., 2016		120
Jinju	South Korea	1.1832	6.2	2013.6-2013.10	long	SD	GM	18	20.2083	58.2	Haque et al., 2016		120
Jinju	South Korea	1.1832	6.2	2013.6-2013.10	long	SD	GM	36	28.8194	83	Haque et al., 2016		120
Jinju	South Korea	2.2272	6.1	2006	Unknown	CF	straw_on_season	5	12.6736	36.5	Ali et al., 2008		120
Jinju	South Korea	2.2968	6.2	2007	Unknown	CF	straw_on_season	5	12.7	38.1	Ali et al., 2008		125
Mymensingh	Bangladesh	1.0324	5.9	2010-2012	Unknown	MD	Compost	2	4.59861	13.244	Ali et al., 2014		120
Mymensingh	Bangladesh	1.0324	5.9	2010-2012	Unknown	MD	Compost	2	4.40451	12.685	Ali et al., 2014		120
Mymensingh	Bangladesh	1.0324	5.9	2010-2012	Unknown	MD	GM	2	4.53594	13.0635	Ali et al., 2014		120
Mymensingh	Bangladesh	1.0324	5.9	2010-2012	Unknown	MD	GM	2	4.04688	11.655	Ali et al., 2014		120
Mymensingh	Bangladesh	1.0324	5.9	2010-2012	Unknown	MD	Compost	2	4.37847	12.61	Ali et al., 2014		120
Nanjing	China	1.75	6.7	2000.6-2000.10	long	CF	no	0	3.00141	8.5	Zou et al., 2005	118
Nanjing	China	1.75	6.7	2000.6-2000.10	long	SD	no	0	1.05932	3	Zou et al., 2005	118
Nanjing	China	1.75	6.7	2000.6-2000.10	long	CF	straw_on_season	2.25	7.76836	22	Zou et al., 2005	118
Nanjing	China	1.75	6.7	2000.6-2000.10	long	SD	straw_on_season	2.25	4.97881	14.1	Zou et al., 2005	118
Nanjing	China	1.75	6.7	2001.6-2001.10	long	MD	no	0	1.40086	3.9	Zou et al., 2005	116
Nanjing	China	1.75	6.7	2001.6-2001.10	long	MD	straw_on_season	2.25	4.9569	13.8	Zou et al., 2005	116
Nanjing	China	1.75	6.7	2001.6-2001.10	long	MD	straw_on_season	2.25	4.88506	13.6	Zou et al., 2005	116
Nanjing	China	1.31	6.1	2001.6-2001.10	long	MD	no	0	1.4	17.3	Zou et al., 2005	116
Nanjing	China	1.31	6.1	2001.6-2001.10	long	MD	no	0	3.15	7.3	Zou et al., 2005	116
Nanjing	China	1.31	6.1	2001.6-2001.10	long	MD	no	0	3.49	4.2	Zou et al., 2005	116
Shanghai	China	1.62806	7.06	2012-2013	long	SD	no	0	1.42412	4.6825	Zhao et al., 2015	137
Shanghai	China	1.48132	7.18	2012-2013	long	SD	no	0	2.10113	6.9085	Zhao et al., 2015	137
Shanghai	China	1.37576	7.08	2012-2013	long	SD	FYM	3.61446	4.97795	16.3675	Zhao et al., 2015	137
Shanghai	China	1.81714	7.05	2012-2013	long	SD	FYM	18.0723	8.60751	28.3015	Zhao et al., 2015	137
Huanggang	China	1.89	4.79	2011.7-2011.10	long	SD	no	0	13.3838	31.8	Zhang et al., 2016a	99
Huanggang	China	1.89	4.79	2011.7-2011.10	long	SD	straw_on_season	3	15.8249	37.6	Zhang et al., 2016a	99
Huanggang	China	1.89	4.79	2011.7-2011.10	long	SD	straw_on_season	6	20.7912	49.4	Zhang et al., 2016a	99
Huanggang	China	1.89	4.79	2011.7-2011.10	long	SD	straw_on_season	9	22.8114	54.2	Zhang et al., 2016a	99
Huanggang	China	1.689	4.79	2012-2014	long	SD	no	0	19.0046	54.7333	Zhang et al., 2015a		120
Jurong, Zhenjiang	China	1.12	6.9	2008.6-2008.10	flooded	CF	no	0	20.3	63.3	Zhang et al., 2011	133	130
Jurong, Zhenjiang	China	1.12	6.9	2008.6-2008.10	flooded	CF	straw_off_season	4.8	26.7	83.2	Zhang et al., 2011	133	130
Jurong, Zhenjiang	China	1.12	6.9	2008.6-2008.10	long	CF	no	0	9.7	30.2	Zhang et al., 2011	133	130
Jurong, Zhenjiang	China	1.12	6.9	2008.6-2008.10	long	CF	straw_off_season	4.8	10.8	33.8	Zhang et al., 2011	133	130
Wuhan	China	9.2858	6.8	2007.5-2007.9	long	CF	no	0	9.5	22.8	Zhan et al., 2011	100
Shiyan	China	1.03	6.2	2011.4-2011.9	long	SD	no	0	1.99011	6.97333	Yao et al., 2014	146
Shiyan	China	1.03	6.2	2011.4-2011.9	long	SD	no	0	1.33942	4.69333	Yao et al., 2014	146
Yangzhou	China	1.84	8	2005.6-2005.10	long	MD	no	0	6.87447	21.6133	Yao et al., 2013a	131
Yangzhou	China	1.84	8	2005.6-2005.10	long	MD	straw_on_season	4.71698	11.8999	37.4133	Yao et al., 2013a	131
Yangzhou	China	1.84	8	2004-2008	long	MD	no	0	8.74894	27.5067	Yao et al. 2013b	131
Yangzhou	China	1.84	8	2004-2008	long	MD	no	0	5.47074	17.2	Yao et al. 2013b	131
Yangzhou	China	1.84	8	2004-2008	long	MD	no	0	4.06701	12.7867	Yao et al. 2013b	131
Changde	China	1.8	5.2	2007-2009	long	CF	no	0	9.82456	17.92	Shang et al. 2011	76
Changde	China	1.97	5.3	2007-2009	long	CF	no	0	10.4879	19.13	Shang et al. 2011	76
Changde	China	1.83	5.3	2007-2009	long	CF	no	0	10.5263	19.2	Shang et al. 2011	76
Changde	China	2.02	5.1	2007-2009	long	CF	no	0	13.909	25.37	Shang et al. 2011	76
Changde	China	2.6	5.1	2007-2009	long	CF	GM	38.9567	19.227	35.07	Shang et al. 2011	76
Changde	China	2.38	5	2007-2009	long	CF	GM	32.69	17.9715	32.78	Shang et al. 2011	76
Changde	China	1.8	5.2	2007-2009	flooded	MD	no	0	20.8902	44.12	Shang et al. 2011	88
Changde	China	1.97	5.3	2007-2009	flooded	MD	no	0	23.2481	49.1	Shang et al. 2011	88
Changde	China	1.83	5.3	2007-2009	flooded	MD	no	0	21.5767	45.57	Shang et al. 2011	88
Changde	China	2.02	5.1	2007-2009	flooded	MD	no	0	25.5398	53.94	Shang et al. 2011	88
Changde	China	2.6	5.1	2007-2009	flooded	MD	straw_on_season	3.93333	39.1572	82.7	Shang et al. 2011	88
Changde	China	2.38	5	2007-2009	flooded	MD	straw_on_season	1.84	35.5492	75.08	Shang et al. 2011	88
Yangzhou	China	1.84	7.9	2004-2005	long	MD	straw_on_season	4.71698	15.7125	49.4	Xie et al., 2012	131
Yangzhou	China	1.84	7.9	2004-2005	long	MD	straw_on_season	2.35849	11.2171	35.2667	Xie et al., 2012	131
Yangzhou	China	1.84	7.9	2004-2005	long	MD	no	0	5.87362	18.4667	Xie et al., 2012	131
Yangzhou	China	1.84	7.9	2004-2005	long	MD	straw_on_season	4.71698	17.8329	56.0667	Xie et al., 2012	131
Yangzhou	China	1.84	7.9	2004-2005	long	MD	straw_on_season	2.35849	10.9839	34.5333	Xie et al., 2012	131
Yangzhou	China	1.84	7.9	2004-2005	long	MD	no	0	5.49194	17.2667	Xie et al., 2012	131
Yangzhou	China	1.84	7.9	2006.6-2006.10	long	MD	straw_on_season	4.71698	10.0827	31.7	Xie et al., 2012	131
Yangzhou	China	1.84	7.9	2006.6-2006.10	long	MD	straw_on_season	2.35849	6.96565	21.9	Xie et al., 2012	131
Yangzhou	China	1.84	7.9	2006.6-2006.10	long	MD	no	0	2.35369	7.4	Xie et al., 2012	131
Yangzhou	China	1.84	7.9	2006.6-2006.10	long	MD	straw_on_season	4.71698	8.23791	25.9	Xie et al., 2012	131
Yangzhou	China	1.84	7.9	2006.6-2006.10	long	MD	straw_on_season	2.35849	5.85242	18.4	Xie et al., 2012	131
Yangzhou	China	1.84	7.9	2006.6-2006.10	long	MD	no	0	2.09924	6.6	Xie et al., 2012	131
Changshu, Suzhou	China	2.01	7.68	2013-2014	long	MD	straw_on_season	3.41	9.67945	30.6645	Xia et al., 2016a		132
Changshu, Suzhou	China	2.01	7.68	2013-2014	long	MD	straw_on_season	4.57	10.5622	33.461	Xia et al., 2016a		132
Changshu, Suzhou	China	2.01	7.68	2013-2014	long	MD	straw_on_season	5.055	9.13905	28.9525	Xia et al., 2016a		132
Changshu, Suzhou	China	2.01	7.68	2013-2014	long	MD	straw_on_season	5.6	9.32639	29.546	Xia et al., 2016a		132
Changshu, Suzhou	China	2.01	7.68	2013-2014	long	MD	straw_on_season	5.99	10.242	32.4465	Xia et al., 2016a		132
Changshu, Suzhou	China	2.01	7.68	2013-2014	long	MD	Compost	4.77445	5.63447	17.85	Xia et al., 2016b		132
Changshu, Suzhou	China	2.01	7.68	2013-2015	long	MD	Compost	5.03736	5.88699	18.65	Xia et al., 2016b		132
Changshu, Suzhou	China	2.01	7.68	2013-2016	long	MD	Compost	4.98419	6.70139	21.23	Xia et al., 2016b		132
Changshu, Suzhou	China	2.01	7.68	2013-2017	long	MD	Compost	5.10282	6.63826	21.03	Xia et al., 2016b		132
Changshu, Suzhou	China	2.01	7.68	2013-2018	long	MD	straw_on_season	3.99783	8.41225	26.65	Xia et al., 2016b		132
Changshu, Suzhou	China	2.01	7.68	2013-2019	long	MD	straw_on_season	4.13395	9.10038	28.83	Xia et al., 2016b		132
Changshu, Suzhou	China	2.01	7.68	2013-2020	long	MD	straw_on_season	4.20776	7.62942	24.17	Xia et al., 2016b		132
Changshu, Suzhou	China	2.01	7.68	2013-2021	long	MD	straw_on_season	4.48356	7.07702	22.42	Xia et al., 2016b		132
Los Baños	Philippines	1.8	6.1	2012.7-2012.10	short	CF	no	0	5.94152	16.256	Weller et al., 2015	114	83
Los Baños	Philippines	1.8	6.1	2012.7-2012.10	short	CF	no	0	4.23051	11.5747	Weller et al., 2015	114	83
Los Baños	Philippines	1.8	6.1	2012.7-2012.10	short	CF	no	0	3.91179	10.7027	Weller et al., 2015	114	83
Los Baños	Philippines	1.8	6.1	2012.2-2012.5	flooded	RFD	no	0	0.251784	0.658667	Weller et al., 2015	109	87
Los Baños	Philippines	1.8	6.1	2012.2-2012.5	flooded	RFD	no	0	0.275739	0.721333	Weller et al., 2015	109	87
Los Baños	Philippines	1.8	6.1	2012.2-2012.5	flooded	RFD	no	0	0.269113	0.704	Weller et al., 2015	109	87
Shanghai	China	0.77	7.9	2011.7-2011.10	long	MD	no	0	5.9624	17.601	Wu et al., 2015	123
Shanghai	China	0.77	7.9	2011.7-2011.11	long	MD	straw_on_season	10	10.2273	30.191	Wu et al., 2015	123
Shanghai	China	0.77	7.9	2011.7-2011.12	long	MD	straw_on_season	10	9.35061	27.603	Wu et al., 2015	123
Shanghai	China	0.77	7.9	2011.7-2011.13	long	MD	straw_on_season	10	6.36484	18.789	Wu et al., 2015	123
Shanghai	China	0.77	7.9	2011.7-2011.14	long	MD	straw_on_season	10	6.8523	20.228	Wu et al., 2015	123
Fuzhou	China	1.81	6.5	2011-2012	long	CF	no	0	2.365	5.22192	Wang et al., 2015	92
Fuzhou	China	1.81	6.5	2011.8-2011.11	flooded	CF	no	0	3.66	8.08128	Wang et al., 2015	96
Suzhou	China	1.39	7.71	2011.6-2011.10	long	MD	no	0	2.81624	8.78667	Wang et al., 2013	120	130
Suzhou	China	1.53	7.38	2011.6-2011.10	long	MD	no	0	2.61111	8.14667	Wang et al., 2013	120	130
Suzhou	China	1.57	7.41	2011.6-2011.10	long	MD	no	0	5.60684	17.4933	Wang et al., 2013	120	130
Suzhou	China	1.51	7.36	2011.6-2011.10	long	MD	no	0	5.00427	15.6133	Wang et al., 2013	120	130
Suzhou	China	1.53	7.29	2011.6-2011.10	long	MD	no	0	4.38462	13.68	Wang et al., 2013	120	130
Nanjing	China	1.47	5.7	2005-2006	long	SD	no	0	4.39815	13.3	Wang et al., 2012	126
Nanjing	China	1.47	5.7	2005-2006	long	SD	no	0	3.25728	9.85	Wang et al., 2012	126
Nanjing	China	1.47	5.7	2005-2006	long	SD	straw_on_season	3	15.3604	46.45	Wang et al., 2012	126
Nanjing	China	1.47	5.7	2005-2006	long	SD	straw_on_season	3	15.6085	47.2	Wang et al., 2012	126
Nanjing	China	1.47	5.7	2006.6-2006.10	long	CF	no	0	7.3082	22.1	Wang et al., 2012	125
Nanjing	China	1.47	5.7	2006.6-2006.10	long	CF	no	0	9.16005	27.7	Wang et al., 2012	125
Nanjing	China	1.47	5.7	2006.6-2006.10	long	CF	straw_on_season	3	18.1217	54.8	Wang et al., 2012	125
Nanjing	China	1.47	5.7	2006.6-2006.10	long	CF	straw_on_season	3	17.0304	51.5	Wang et al., 2012	125
Haryana	India	0.71	7.6	2011-2012	long	MD	no	0	1.03117	3.242	Sapkota et al., 2015		131
Changsha, Hunan	China	1.33	5.4	2012-2013	long	MD	straw_on_season	7.5	6.95177	12.1795	Tang et al., 2015	73
Changsha, Hunan	China	1.33	5.4	2012-2013	long	MD	straw_on_season	7.5	11.2095	19.639	Tang et al., 2015	73
Changsha, Hunan	China	1.33	5.4	2012-2013	long	MD	straw_on_season	15	4.07163	7.1335	Tang et al., 2015	73
Changsha, Hunan	China	1.33	5.4	2012-2013	flooded	MD	straw_on_season	4.5	22.6704	51.6885	Tang et al., 2015	95
Changsha, Hunan	China	1.33	5.4	2012-2013	flooded	MD	straw_on_season	4.5	27.2818	62.2025	Tang et al., 2015	95
Changsha, Hunan	China	1.33	5.4	2012-2013	flooded	MD	straw_on_season	4.5	12.8123	29.212	Tang et al., 2015	95
Changsha, Hunan	China	1.33	5.4	2012-2013	long	MD	straw_on_season	22.5	8.60188	15.0705	Tang et al., 2014	73
Changsha, Hunan	China	1.33	5.4	2012-2013	long	MD	straw_on_season	22.5	7.31022	12.8075	Tang et al., 2014	73
Changsha, Hunan	China	1.33	5.4	2012-2013	flooded	MD	straw_on_season	4.5	16.2893	37.1395	Tang et al., 2014	95
Changsha, Hunan	China	1.33	5.4	2012-2013	flooded	MD	straw_on_season	4.5	14.4518	32.95	Tang et al., 2014	95
Changsha, Hunan	China	1.84	5.31	2011.7-2011.10	flooded	MD	no	0	2.69231	5.88	Shen et al., 2014	91
Changsha, Hunan	China	1.84	5.31	2011.7-2011.10	flooded	MD	straw_on_season	3	8.93162	19.5067	Shen et al., 2014	91
Changsha, Hunan	China	1.84	5.31	2011.7-2011.10	flooded	MD	straw_on_season	6	16.9719	37.0667	Shen et al., 2014	91
Changsha, Hunan	China	1.89	5.08	2012.4-2012.7	long	MD	no	0	0.994152	1.81333	Shen et al., 2014	76
Changsha, Hunan	China	1.89	5.08	2012.4-2012.7	long	MD	straw_on_season	3	11.1038	20.2533	Shen et al., 2014	76
Changsha, Hunan	China	1.89	5.08	2012.4-2012.7	long	MD	straw_on_season	6	23.3187	42.5333	Shen et al., 2014	76
Pantnagar	India	1.3	7.74	2004.6-2004.10	Unknown	CF	no	0	1.23	3.86712	Singh et al., 2009		131
Pantnagar	India	1.3	7.74	2004.6-2004.10	Unknown	CF	no	0	1.27	3.99288	Singh et al., 2009		131
Pantnagar	India	1.3	7.74	2004.6-2004.10	Unknown	CF	no	0	2.25	7.074	Singh et al., 2009		131
Pantnagar	India	1.3	7.74	2004.6-2004.10	Unknown	CF	no	0	2.24	7.04256	Singh et al., 2009		131
Pantnagar	India	1.3	7.74	2004.6-2004.10	Unknown	CF	straw_on_season	10	7.7	24.2088	Singh et al., 2009		131
Pantnagar	India	1.3	7.74	2004.6-2004.10	Unknown	CF	straw_on_season	10	4.6	14.4624	Singh et al., 2009		131
Pantnagar	India	1.3	7.74	2004.6-2004.10	Unknown	CF	Compost	2	0.92	2.89248	Singh et al., 2009		131
Pantnagar	India	1.3	7.74	2004.6-2004.10	Unknown	CF	Compost	2	0.75	2.358	Singh et al., 2009		131
Nanjing	China	1.52	6.3	2007.6-2007.10	long	MD	no	0	1.62697	4.959	Zou et al., 2009	119	127
Nanjing	China	1.52	6.3	2007.6-2007.10	long	MD	no	0	1.49869	4.568	Zou et al., 2009	119	127
Tongjiang	China	2.9	6.5	2006.5-2006.9	Unknown	MD	no	0	6.93333	20.8	Chen et al., 2013	101	125
BacGiang	Vietnam	0.75	5.3	2011.6-2011.9	flooded	SD	no	0	8.62349	16.971	Vu et al., 2015	89	82
BacGiang	Vietnam	0.75	5.3	2011.6-2011.9	flooded	SD	no	0	11.9385	23.495	Vu et al., 2015	89	82
BacGiang	Vietnam	0.75	5.3	2011.6-2011.9	flooded	SD	FYM	8	14.6935	28.9169	Vu et al., 2015	89	82
BacGiang	Vietnam	0.75	5.3	2011.6-2011.9	flooded	SD	FYM	6.3	11.0649	21.7758	Vu et al., 2015	89	82
BacGiang	Vietnam	0.75	5.3	2012.2-2012.5	long	CF	no	0	2.77173	7.31738	Vu et al., 2015	119	110
BacGiang	Vietnam	0.75	5.3	2012.2-2012.5	long	CF	no	0	2.83852	7.4937	Vu et al., 2015	119	110
BacGiang	Vietnam	0.75	5.3	2012.2-2012.5	long	CF	FYM	8	3.40623	8.99244	Vu et al., 2015	119	110
BacGiang	Vietnam	0.75	5.3	2012.2-2012.5	long	CF	FYM	6.3	5.24292	13.8413	Vu et al., 2015	119	110
Jinju	South Korea	1.18	6.32	2011-2012	long	CF	no	0	10.3073	31.6639	Kim et al., 2014b		128
Jinju	South Korea	1.18	6.32	2011-2012	long	CF	FYM	2	37.6435	115.641	Kim et al., 2014b		128
Jinju	South Korea	1.18	6.32	2011-2012	long	CF	Compost	3	15.4515	47.4672	Kim et al., 2014b		128
Jinju	South Korea	1.18	6.32	2011-2012	long	CF	FYM	2	31.9577	98.1741	Kim et al., 2014b		128
Jinju	South Korea	1.18	6.32	2011-2012	long	CF	Compost	3	12.6601	38.8917	Kim et al., 2014b		128
Jinju	South Korea	0.98	6.6	2009-2010	long	CF	no	0	4.61756	13.8527	Kim et al., 2012	125
Jinju	South Korea	0.98	6.6	2009-2010	long	CF	no	0	12.3588	37.0764	Kim et al., 2012	125
Jinju	South Korea	0.98	6.6	2009-2010	long	CF	GM	17.2	25.6374	76.9122	Kim et al., 2012	125
Jinju	South Korea	0.98	6.6	2009-2010	long	CF	GM	15.45	18.3698	55.1094	Kim et al., 2012	125
Jinju	South Korea	1.44	6.2	2007-2008, 2011	long	CF	no	0	11.9097	34.3	Kim et al., 2016		120
Yixing, Wuxi	China	0.9396	6.23	2008-2009	long	SD	no	0	3.535	21.65	Huang et al., 2014	127
Yixing, Wuxi	China	0.9396	6.23	2008-2009	long	SD	no	0	3.98	32.05	Huang et al., 2014	127
IARI, New Delhi	India	0.35	8.8	2007-2008	Unknown	CF	no	0	1.39881	3.76	Bhatia et al., 2011	112
Cuttack	India	0.382	6.16	2012.7-2012.11	Unknown	CF	no	0	2.26888	6.97	Bhattacharyya et al., 2012		128
Cuttack	India	0.417	6.16	2012.7-2012.11	Unknown	CF	no	0	3.01432	9.26	Bhattacharyya et al., 2012		128
Cuttack	India	0.442	6.16	2012.7-2012.11	Unknown	CF	straw_on_season	4.83871	3.75651	11.54	Bhattacharyya et al., 2012		128
Cuttack	India	0.66	6.16	Jan-May	Unknown	CF	no	0	4.77231	11.339	Das and Adhya, 2014		99
Cuttack	India	0.66	6.16	Jan-May	Unknown	CF	no	0	6.29798	14.964	Das and Adhya, 2014		99
Cuttack	India	0.66	6.16	Jan-May	Unknown	CF	straw_on_season	7.31707	8.71928	20.717	Das and Adhya, 2014		99
Cuttack	India	0.66	6.16	Jan-May	Unknown	CF	Compost	2.91262	7.87879	18.72	Das and Adhya, 2014		99
Cuttack	India	0.66	6.16	Jan-May	Unknown	CF	FYM	2.0979	7.7963	18.524	Das and Adhya, 2014		99
IARI, New Delhi	India	0.53	8.04	2009.7-2009.10	Unknown	CF	FYM	10	0.905048	2.259	Jain et al., 2014		104
Mianyang	China	1.218	8.1	2003-2004	flooded	CF	straw_off_season	2.696	21.3724	64.63	Jiang et al., 2006	126
Mianyang	China	1.218	8.1	2003-2004	long	MD	straw_on_season	2.18	9.35483	28.289	Jiang et al., 2006	126
Mianyang	China	1.218	8.1	2003-2004	long	MD	straw_on_season	2.176	8.68519	26.264	Jiang et al., 2006	126
Taiwan	China	0.667	7.7	1999.2-1999.6	Unknown	CF	no	0	0.9	2.7648	Liou et al., 2003b	128
Taiwan	China	0.725	7.5	1999.2-1999.6	Unknown	CF	no	0	0.41	1.25952	Liou et al., 2003b	128
Taiwan	China	0.8178	6.6	1999.2-1999.6	Unknown	CF	no	0	2.82	8.66304	Liou et al., 2003b	128
Taiwan	China	0.8526	6.5	1999.2-1999.6	Unknown	CF	no	0	3	9.216	Liou et al., 2003b	128
Taiwan	China	0.667	7.7	1999.7-1999.11	flooded	CF	no	0	9.17	24.649	Liou et al., 2003b	112
Taiwan	China	0.725	7.5	1999.7-1999.11	flooded	CF	no	0	12.7	34.1376	Liou et al., 2003b	112
Taiwan	China	0.8178	6.6	1999.7-1999.11	flooded	CF	no	0	13.56	36.4493	Liou et al., 2003b	112
Taiwan	China	0.8526	6.5	1999.7-1999.11	flooded	CF	no	0	19.54	52.5235	Liou et al., 2003b	112
Tramkak, Takeo	Cambodia	0.287	4.05	2011.9-2011.12	short	CF	no	0	8.29719	15.5323	Ly et al., 2013	78
Tramkak, Takeo	Cambodia	0.287	4.05	2011.9-2011.12	short	CF	Compost	10	12.1581	22.76	Ly et al., 2013	78
Tramkak, Takeo	Cambodia	0.287	4.05	2011.9-2011.12	short	CF	no	0	10.4439	19.551	Ly et al., 2013	78
Tramkak, Takeo	Cambodia	0.287	4.05	2011.9-2011.12	short	CF	Compost	10	15.0613	28.1948	Ly et al., 2013	78
Tramkak, Takeo	Cambodia	0.287	4.05	2011.9-2011.12	short	MD	no	0	8.29521	15.5286	Ly et al., 2013	78
Tramkak, Takeo	Cambodia	0.287	4.05	2011.9-2011.12	short	MD	Compost	10	9.49466	17.774	Ly et al., 2013	78
Tramkak, Takeo	Cambodia	0.287	4.05	2011.9-2011.12	short	MD	no	0	8.6769	16.2432	Ly et al., 2013	78
Tramkak, Takeo	Cambodia	0.287	4.05	2011.9-2011.12	short	MD	Compost	10	11.4173	21.3731	Ly et al., 2013	78
Ibaraki	Japan	4.42	6	2001.5-2001.9	Unknown	CF	no	0	0.55	1.24	Minamikawa et al., 2005	113
Ibaraki	Japan	4.42	6	2001.5-2001.9	Unknown	CF	no	0	2.03	4.09	Minamikawa et al., 2005	113
Ibaraki	Japan	4.42	6	2001.5-2001.9	Unknown	CF	no	0	4.38	7.58	Minamikawa et al., 2005	113
Ibaraki	Japan	4.42	6	2001.5-2001.9	Unknown	CF	no	0	3.15	5.87	Minamikawa et al., 2005	113
Ibaraki	Japan	4.42	6	2001.5-2001.9	Unknown	CF	no	0	4.83	7.86	Minamikawa et al., 2005	111
Mikasa, Hokkaido	Japan	0.226	5.78	2004.5-2004.9	long	CF	no	0	1.73333	5.38667	Naser et al., 2007	128
Mikasa, Hokkaido	Japan	0.344	6.03	2004.5-2004.9	long	CF	straw_off_season	0.8	7.27778	13.12	Naser et al., 2007	111
Mikasa, Hokkaido	Japan	0.226	5.78	2004.5-2004.9	long	CF	straw_off_season	1.05	6.94444	12.12	Naser et al., 2007	116
Mikasa, Hokkaido	Japan	0.167	5.39	2004.5-2004.9	long	CF	straw_off_season	1.9	24.7222	51.8667	Naser et al., 2007	112
Mikasa, Hokkaido	Japan	0.287	5.4	2004.5-2004.9	long	CF	straw_off_season	2.19	25.3333	54.4	Naser et al., 2007	112
Duryang	South Korea	1.179	6.32		Unknown	CF	no	0	11.5417	33.24	Pramanik and Kim, 2014		120
Duryang	South Korea	1.179	6.32		Unknown	CF	FYM	2	21.2812	61.29	Pramanik and Kim, 2014		120
Duryang	South Korea	1.179	6.32		Unknown	CF	Compost	1.1	15.1073	43.509	Pramanik and Kim, 2014		120
Ehime	Japan	1.45	6.4	2012.6-2012.10	long	SD	straw_off_season	1.59	1.9899	5.25333	Toma et al., 2016	110
Ehime	Japan	1.45	6.4	2012.6-2012.10	long	SD	straw_off_season	1.37	3.64646	9.62667	Toma et al., 2016	110
Ehime	Japan	1.45	6.4	2013.6-2013.10	long	SD	straw_off_season	6.92	10.2241	29.2	Toma et al., 2016	119
Ehime	Japan	1.45	6.4	2013.6-2013.10	long	SD	straw_off_season	7.25	9.38375	26.8	Toma et al., 2016	119
Suzhou	China	1.91	6.3	2008-2011	long	MD	no	0	2.98433	11.1733	Zhang et al., 2015b	156
Wuxi	China	0.182	6.5	2011-2012	long	MD	no	0	3.97681	10.976	Zhang et al., 2015c		115
Wuxi	China	0.182	6.5	2011-2012	long	MD	straw_on_season	3	8.91757	24.6125	Zhang et al., 2015c		115
Yingtan	China	1.7	4.74	2010-2014	flooded	MD	straw_on_season	3.5	5.21329	10.51	Zhang et al., 2016b	84
Yingtan	China	1.7	4.74	2010-2014	flooded	MD	no	0	4.14839	11.35	Zhang et al., 2016b	114
Cachoeirinha	Brazil	0.928	5.4	2009-2010	long	CF	GM	7.5	10.7417	36.35	Zschornack et al., 2016	141
Cachoeirinha	Brazil	0.928	5.4	2009	long	SD	GM	7.5	6.42123	22.5	Zschornack et al., 2016	146
Cachoeirinha	Brazil	0.928	5.4	2010	long	MD	GM	7.5	1.40931	4.6	Zschornack et al., 2016	136
Cachoeirinha	Brazil	0.928	5.4	2010	long	MD	GM	7.5	2.72672	8.9	Zschornack et al., 2016	136
Cachoeirinha	Brazil	0.986	5.6		long	CF	GM	7.5	14.0121	41.7	Bayer et al., 2015	124
Cachoeirinha	Brazil	0.986	5.3		long	CF	GM	7.5	10.6183	31.6	Bayer et al., 2015	124
Cachoeirinha	Brazil	1.16	5.1		long	CF	GM	7.5	18.75	51.7	Bayer et al., 2014	127
Cachoeirinha	Brazil	1.218	5		long	CF	GM	7.5	14.5833	40.8	Bayer et al., 2014	127
Treinta y Tres	Uruguay	1.16	6	2010-2011	long	CF	no	0	5.35494	20.82	Tarlera et al., 2016	110	162
Treinta y Tres	Uruguay	1.16	6	2010-2011	long	SD	no	0	2.39969	9.33	Tarlera et al., 2016	110	162
Treinta y Tres	Uruguay	1.16	5.5	2011-2012	long	CF	no	0	6.49479	24.94	Tarlera et al., 2016	111	160
Treinta y Tres	Uruguay	1.16	5.5	2011-2012	long	SD	no	0	2.76823	10.63	Tarlera et al., 2016	111	160
Treinta y Tres	Uruguay	1.16	6.3	2012-2013	long	CF	no	0	8.29333	24.88	Tarlera et al., 2016	119	125
Treinta y Tres	Uruguay	1.16	6.3	2012-2013	long	SD	no	0	3.19	9.57	Tarlera et al., 2016	119	125
IRRI, Los Baños	Philippines	1.2	7	1994 wet	short	RFW	no	0	0.127778	0.306667	Abao et al., 2000		100
IRRI, Los Baños	Philippines	1.2	7	1994 wet	short	RFW	no	0	0.122222	0.293333	Abao et al., 2000		100
IRRI, Los Baños	Philippines	1.2	7	1995 wet	short	RFW	no	0	0.300454	0.706667	Abao et al., 2000		98
IRRI, Los Baños	Philippines	1.2	7	1995 wet	short	RFW	no	0	0.31746	0.746667	Abao et al., 2000		98
IRRI, Los Baños	Philippines	1.2	7	1995 wet	short	RFW	straw_on_season	3	0.884354	2.08	Abao et al., 2000		98
IRRI, Los Baños	Philippines	1.2	7	1995 wet	short	RFW	straw_on_season	3	1.46259	3.44	Abao et al., 2000		98
Robbins, CA	USA	1.34	6.1	2010-2011	long	CF	straw_off_season	8	0.43771	1.73333	Adviento-Borbe et al., 2013	165
Robbins, CA	USA	1.34	6.1	2010-2011	long	CF	straw_off_season	8	0.40404	1.6	Adviento-Borbe et al., 2013	165
Robbins, CA	USA	1.34	6.1	2010-2011	long	CF	straw_off_season	8	0.309764	1.22667	Adviento-Borbe et al., 2013	165
Robbins, CA	USA	1.34	6.1	2010-2011	long	CF	straw_off_season	8	0.572391	2.26667	Adviento-Borbe et al., 2013	165
Robbins, CA	USA	1.34	6.1	2010-2011	long	CF	straw_off_season	8	0.639731	2.53333	Adviento-Borbe et al., 2013	165
Robbins, CA	USA	1.37	5.46	2011-2012	flooded	CF	no	0	4.96296	17.8667	Adviento-Borbe et al., 2013	150
Robbins, CA	USA	1.37	5.46	2011-2012	flooded	CF	no	0	5.48148	19.7333	Adviento-Borbe et al., 2013	150
Robbins, CA	USA	1.37	5.46	2011-2012	flooded	CF	no	0	5.74074	20.6667	Adviento-Borbe et al., 2013	150
Robbins, CA	USA	1.37	5.46	2011-2012	flooded	CF	no	0	6.77778	24.4	Adviento-Borbe et al., 2013	150
Robbins, CA	USA	1.37	5.46	2011-2012	flooded	CF	no	0	5.77778	20.8	Adviento-Borbe et al., 2013	150
Stuttgart, AR	USA	0.676	6.19	2011-2012	long	CF	straw_on_season	8	0.824653	2.53333	Adviento-Borbe et al., 2013	128
Stuttgart, AR	USA	0.676	6.19	2011-2012	long	CF	straw_on_season	8	1.77951	5.46667	Adviento-Borbe et al., 2013	128
Stuttgart, AR	USA	0.676	6.19	2011-2012	long	CF	straw_on_season	8	1.99653	6.13333	Adviento-Borbe et al., 2013	128
Stuttgart, AR	USA	0.676	6.19	2011-2012	long	CF	straw_on_season	8	1.73611	5.33333	Adviento-Borbe et al., 2013	128
Davis, CA	USA	1.59	6.6	2012	long	CF	no	0	0.232963	0.838667	Adviento-Borbe and Linquist, 2016	150
Davis, CA	USA	1.59	6.6	2012	long	CF	no	0	0.451852	1.62667	Adviento-Borbe and Linquist, 2016	150
Davis, CA	USA	1.59	6.6	2012	long	CF	no	0	0.503704	1.81333	Adviento-Borbe and Linquist, 2016	150
Marysville, CA	USA	1.37	5.46	2013	flooded	CF	no	0	10.3065	35.8667	Adviento-Borbe and Linquist, 2016	145
Marysville, CA	USA	1.37	5.46	2013	flooded	CF	no	0	11.3793	39.6	Adviento-Borbe and Linquist, 2016	145
Marysville, CA	USA	1.37	5.46	2013	flooded	CF	no	0	8.85057	30.8	Adviento-Borbe and Linquist, 2016	145
Biggs, CA	USA	1.26	4.8	2014	flooded	CF	no	0	2.60652	8.32	Adviento-Borbe and Linquist, 2016	133
Biggs, CA	USA	1.26	4.8	2014	flooded	CF	no	0	5.55556	17.7333	Adviento-Borbe and Linquist, 2016	133
Biggs, CA	USA	1.26	4.8	2014	flooded	CF	no	0	4.80368	15.3333	Adviento-Borbe and Linquist, 2016	133
Stuttgart, AR	USA	0.7	6.2	2012.5-9	long	CF	no	0	7.03704	21.28	Brye et al., 2013	126
Keiser, AR	USA	1.4	7.6	2012.4-9	long	CF	no	0	1.22085	4.74667	Brye et al., 2013	162
Biggs, CA	USA	1.26	4.8	2011.5-10	long	CF	no	0	2.14815	7.73333	Simmonds et al., 2015	150
Biggs, CA	USA	1.26	4.8	2011.5-10	long	CF	no	0	2.22222	8	Simmonds et al., 2015	150
Biggs, CA	USA	1.26	4.8	2011.5-10	long	CF	no	0	2.55556	9.2	Simmonds et al., 2015	150
Davis, CA	USA	1.59	6.4	2012.6-10	long	CF	no	0	0.253212	0.893333	Simmonds et al., 2015	147
Davis, CA	USA	1.59	6.4	2012.6-10	long	CF	no	0	0.415722	1.46667	Simmonds et al., 2015	147
Davis, CA	USA	1.59	6.4	2012.6-10	long	CF	no	0	0.415722	1.46667	Simmonds et al., 2015	147
Davis, CA	USA	1.59	6.4	2012.6-10	long	CF	no	0	0.529101	1.86667	Simmonds et al., 2015	147
Davis, CA	USA	1.59	6.4	2012.6-10	long	CF	no	0	0.415722	1.46667	Simmonds et al., 2015	147
Arbuckle, CA	USA	0.14	6.2	2010-2012	long	CF	no	0	2.88462	10.8	Pittelkow et al., 2013	156
Arbuckle, CA	USA	0.14	6.2	2010-2012	long	CF	no	0	4.13105	15.4667	Pittelkow et al., 2013	156
Arbuckle, CA	USA	0.14	6.2	2010-2012	long	CF	no	0	4.20228	15.7333	Pittelkow et al., 2013	156
Arbuckle, CA	USA	0.14	6.2	2010-2012	long	CF	no	0	4.30912	16.1333	Pittelkow et al., 2013	156
Arbuckle, CA	USA	0.14	6.2	2010-2012	long	CF	no	0	3.7037	13.8667	Pittelkow et al., 2013	156
Maxwell, CA	USA	0.196	6.9	1997.5-10	flooded	CF	no	0	3.22077	11.8267	Bossio et al., 1999	153
Maxwell, CA	USA	0.196	6.9	1997.5-10	long	CF	straw_off_season	9.8	3.45679	12.6933	Bossio et al., 1999	153
Maxwell, CA	USA	0.186	6.9	1997.5-10	flooded	CF	no	0	0.591866	2.17333	Bossio et al., 1999	153
Maxwell, CA	USA	0.186	6.9	1997.5-10	long	CF	straw_off_season	0.7	0.816993	3	Bossio et al., 1999	153
Texas	USA	1.76	5.5	1989.5	long	CF	no	0	2.5	4.5	Sass et al., 1990, 1994		75
Texas	USA	1.76	5.5	1990-1991	long	CF	straw_off_season	8	4.3457	13.35	Sass et al., 1990, 1994	128
Texas	USA	1.76	5.5	1991.4	long	CF	no	0	4.26432	13.1	Sass et al., 1990, 1994	128
Texas	USA	1.76	5.5	1991.4	long	CF	straw_off_season	8	5.14323	15.8	Sass et al., 1990, 1994	128
Texas	USA	1.76	5.5	1991.4	long	CF	straw_off_season	8	5.37109	16.5	Sass et al., 1990, 1994	128
Texas	USA	1.76	5.5	1991.4	long	CF	no	0	5.85938	18	Sass et al., 1990, 1994	128
Texas	USA	1.76	5.5	1991.4	long	CF	straw_off_season	8	4.6224	14.2	Sass et al., 1990, 1994	128
Texas	USA	1.56	5.4	1989.5	long	CF	no	0	8.83333	15.9	Sass et al., 1990, 1994		75
Texas	USA	1.56	5.4	1990-1991	long	CF	straw_off_season	12	9.94466	30.55	Sass et al., 1990, 1994	128
Texas	USA	1.11	5.5	1990	long	CF	no	0	8.78205	27.4	Sass et al., 1991, 1994	130
Texas	USA	1.11	5.5	1990	long	CF	straw_on_season	6	11.3996	35.5667	Sass et al., 1991, 1994	130
Texas	USA	1.11	5.5	1991.5-1991.9	long	CF	no	0	4.43917	9.27	Sass et al., 1992	140	87
Texas	USA	1.11	5.5	1991.5-1991.9	long	SD	no	0	2.32875	4.86	Sass et al., 1992	140	87
Texas	USA	1.11	5.5	1991.5-1991.9	long	MD	no	0	0.550417	1.15	Sass et al., 1992	140	87
Texas	USA	1.11	5.5	1991.5-1991.9	long	Unknown	no	0	6.30375	14.98	Sass et al., 1992	140	100
Maxwell, CA	USA	1.74	6.6	1994-1996	flooded	CF	no	0	1.63219	5.445	Fitzgerald et al., 2000	139
Maxwell, CA	USA	1.74	6.6	1994-1996	flooded	CF	no	0	2.58993	8.64	Fitzgerald et al., 2000	139
Maxwell, CA	USA	1.74	6.6	1994-1996	flooded	CF	no	0	3.65258	12.185	Fitzgerald et al., 2000	139
Maxwell, CA	USA	1.74	6.6	1994-1996	long	CF	straw_on_season	3	1.2515	4.175	Fitzgerald et al., 2000	139
Maxwell, CA	USA	1.74	6.6	1994-1996	long	CF	straw_off_season	10.05	3.40977	11.375	Fitzgerald et al., 2000	139
Maxwell, CA	USA	1.74	6.6	1994-1996	long	CF	straw_off_season	11.305	4.63879	15.475	Fitzgerald et al., 2000	139
Vercelli	Italy	1.45	6	1983	long	CF	no	0	16	53.76	Holzapfel-Pschorn and Seiler, 1986	140
Vercelli	Italy	1.45	6	1985	long	CF	no	0	11.3722	36.3	Holzapfel-Pschorn and Seiler, 1986	133
Vercelli	Italy	1.45	6	1990.5-9	long	CF	no	0	11.4	35.2944	Butterbach-Bahl et al., 1997	129
Vercelli	Italy	1.45	6	1990.5-9	long	CF	no	0	8.1	25.0776	Butterbach-Bahl et al., 1997	129
Vercelli	Italy	1.45	6	1991.5-9	long	CF	straw_on_season	2	20.9	64.7064	Butterbach-Bahl et al., 1997	129
Vercelli	Italy	1.45	6	1991.5-9	long	CF	straw_on_season	2	15.9	49.2264	Butterbach-Bahl et al., 1997	129
Vercelli	Italy	1.45	6	1983-1986	long	CF	no	0	11.875	34.2	Schütz et al., 1989	120
Vercelli	Italy	1.45	6	1984	long	CF	no	0	12.5	36	Schütz et al., 1989	120
Vercelli	Italy	1.45	6	1984	long	CF	no	0	9.58333	27.6	Schütz et al., 1989	120
Vercelli	Italy	1.45	6	1984	long	CF	no	0	9.58333	27.6	Schütz et al., 1989	120
Vercelli	Italy	1.45	6	1986	long	CF	no	0	7.91667	22.8	Schütz et al., 1989	120
Vercelli	Italy	1.45	6	1986	long	CF	no	0	15.8333	45.6	Schütz et al., 1989	120
Vercelli	Italy	1.45	6	1984	long	CF	no	0	6.66667	19.2	Schütz et al., 1989	120
Vercelli	Italy	1.45	6	1985	long	CF	no	0	6.25	18	Schütz et al., 1989	120
Vercelli	Italy	1.45	6	1986	long	CF	no	0	5	14.4	Schütz et al., 1989	120
Vercelli	Italy	1.45	6	1985	long	CF	no	0	8.75	25.2	Schütz et al., 1989	120
Vercelli	Italy	1.45	6	1985	long	CF	no	0	7.5	21.6	Schütz et al., 1989	120
Vercelli	Italy	1.45	6	1986	long	CF	no	0	12.5	36	Schütz et al., 1989	120
Vercelli	Italy	1.45	6	1984	long	CF	straw_on_season	5	24.1667	69.6	Schütz et al., 1989	120
Vercelli	Italy	1.45	6	1985	long	CF	straw_on_season	3	9.58333	27.6	Schütz et al., 1989	120
Vercelli	Italy	1.45	6	1985	long	CF	straw_on_season	6	12.9167	37.2	Schütz et al., 1989	120
Vercelli	Italy	1.45	6	1985	long	CF	straw_on_season	12	15.8333	45.6	Schütz et al., 1989	120
Vercelli	Italy	1.45	6	1986	long	CF	straw_on_season	6	14.1667	40.8	Schütz et al., 1989	120
Vercelli	Italy	1.45	6	1986	long	CF	straw_on_season	12	28.3333	81.6	Schütz et al., 1989	120
Vercelli	Italy	1.45	6	1986	long	CF	straw_on_season	24	18.75	54	Schütz et al., 1989	120
Vercelli	Italy	1.45	6	1986	long	CF	Compost	60	27.5	79.2	Schütz et al., 1989	120
Vercelli	Italy	1.45	6	1984	long	CF	straw_on_season	2.5	11.6667	33.6	Schütz et al., 1989	120
Vercelli	Italy	1.45	6	1984	long	CF	straw_on_season	5	17.9167	51.6	Schütz et al., 1989	120
Vercelli	Italy	1.45	6	1985	long	CF	straw_on_season	12	21.6667	62.4	Schütz et al., 1989	120
Vercelli	Italy	1.45	6	1986	long	CF	straw_on_season	12	19.5833	56.4	Schütz et al., 1989	120
Vercelli	Italy	1.45	6	1986	long	CF	straw_on_season	6	20	57.6	Schütz et al., 1989	120
Vercelli	Italy	1.45	6	1986	long	CF	straw_on_season	12	25	72	Schütz et al., 1989	120
Shenyang	China	0.9396	6.7	2000.5-10	Unknown	CF	FYM	37.5	6.47523	23	Jiao et al., 2006	148
Shenyang	China	0.9396	6.7	2000.5-10	Unknown	MD	FYM	37.5	4.90709	17.43	Jiao et al., 2006	148
Crowley, Louisiana	USA	0.6844	7.12	2003.4-8	Flooded	SD	no	0	14.5036	38.2894	Kongchum et al., 2006	110
Crowley, Louisiana	USA	0.7714	6.83	2003.4-8	Flooded	SD	straw_on_season	3	16.7726	44.2798	Kongchum et al., 2006	110
Crowley, Louisiana	USA	0.783	6.75	2003.4-8	Flooded	SD	straw_on_season	6	29.5749	78.0777	Kongchum et al., 2006	110
Crowley, Louisiana	USA	0.8004	6.5	2003.4-8	Flooded	SD	straw_on_season	12	46.4274	122.568	Kongchum et al., 2006	110
Crowley, Louisiana	USA	1.0034	6.48	2003.4-8	Flooded	SD	straw_on_season	24	123.241	325.356	Kongchum et al., 2006	110
Crowley, Louisiana	USA	0.7018	6.7	2003.4-8	Flooded	CF	no	0	15.3138	40.4285	Kongchum et al., 2006	110
Crowley, Louisiana	USA	0.7424	6.87	2003.4-8	Flooded	CF	straw_on_season	3	18.3941	48.5605	Kongchum et al., 2006	110
Crowley, Louisiana	USA	0.7946	6.71	2003.4-8	Flooded	CF	straw_on_season	6	32.0056	84.4949	Kongchum et al., 2006	110
Crowley, Louisiana	USA	0.8758	6.67	2003.4-8	Flooded	CF	straw_on_season	12	81.2679	214.547	Kongchum et al., 2006	110
Crowley, Louisiana	USA	0.9976	6.48	2003.4-8	Flooded	CF	straw_on_season	24	278.808	736.052	Kongchum et al., 2006	110
Bologna	Italy	1.21	8.2	2012.4-9	long	CF	straw_off_season	5.175	0.229484	0.842667	Lagomarsino et al., 2016	153
Bologna	Italy	1.23	8.2	2013.5-10	long	CF	straw_off_season	3.945	0.570443	2.09467	Lagomarsino et al., 2016	153
Bologna	Italy	1.21	8.2	2013.5-10	long	SD	straw_off_season	3.46	0.523602	1.92267	Lagomarsino et al., 2016	153
Biggs, CA	USA	1.06	5.3	2013-2014	flooded	CF	no	0	5.02646	17.7333	LaHue et al., 2016	147
Biggs, CA	USA	1.06	5.3	2013-2014	flooded	MD	no	0	1.97657	6.97333	LaHue et al., 2016	147
Biggs, CA	USA	1.06	5.3	2013-2014	flooded	MD	no	0	0.668934	2.36	LaHue et al., 2016	147
Sacramento, CA	USA	1.07	4.75	1992	long	CF	no	0	25.463	66	Lauren et al., 1994		108
Sacramento, CA	USA	1.07	4.75	1992	long	CF	straw_on_season	2.2	33.9506	88	Lauren et al., 1994		108
Sacramento, CA	USA	1.07	4.75	1992	long	CF	GM	9	47.0679	122	Lauren et al., 1994		108
Jiaxing	China	1.82	6.9	2005-2010	long	SD	no	0	0.6875	1.98	Liang et al., 2013	120
Jiaxing	China	1.82	6.9	2005-2010	long	SD	no	0	0.826389	2.38	Liang et al., 2013	120
Jiaxing	China	1.82	6.9	2005-2010	long	SD	no	0	0.725694	2.09	Liang et al., 2013	120
Jiaxing	China	1.82	6.9	2005-2010	long	SD	no	0	0.697917	2.01	Liang et al., 2013	120
Jiaxing	China	1.82	6.9	2005-2010	long	SD	FYM	9.64286	1.00694	2.9	Liang et al., 2013	120
Jiaxing	China	1.82	6.9	2005-2010	long	SD	FYM	19.2857	1.25694	3.62	Liang et al., 2013	120
Jiaxing	China	1.82	6.9	2005-2010	long	SD	FYM	28.9286	1.40972	4.06	Liang et al., 2013	120
Crowley, Louisiana	USA	0.7	5.8	1992.3-7	Unknown	CF	no	0	2.68817	6	Lindau, 1994	134	93
Crowley, Louisiana	USA	0.7	5.8	1992.3-7	Unknown	CF	no	0	3.1362	7	Lindau, 1994	134	93
Crowley, Louisiana	USA	0.7	5.8	1992.3-7	Unknown	CF	no	0	3.58423	8	Lindau, 1994	134	93
Crowley, Louisiana	USA	0.7	5.8	1992.3-7	Unknown	CF	no	0	4.92832	11	Lindau, 1994	134	93
Crowley, Louisiana	USA	0.7	5.8	1992.3-7	Unknown	CF	no	0	4.03226	9	Lindau, 1994	134	93
Crowley, Louisiana	USA	0.7	5.8	1992.3-7	Unknown	CF	no	0	4.48029	10	Lindau, 1994	134	93
Crowley, Louisiana	USA	0.7	5.8	1992.3-7	Unknown	CF	no	0	9.85663	22	Lindau, 1994	134	93
Crowley, Louisiana	USA	0.7	5.8	1990.4-7	Unknown	CF	no	0	10.1744	21	Lindau et al., 1991	130	86
Crowley, Louisiana	USA	0.7	5.8	1990.4-7	Unknown	CF	no	0	14.5349	30	Lindau et al., 1991	130	86
Crowley, Louisiana	USA	0.7	5.8	1990.4-7	Unknown	CF	no	0	15.0194	31	Lindau et al., 1991	130	86
Crowley, Louisiana	USA	0.7	5.8	1990.4-7	Unknown	CF	no	0	17.9264	37	Lindau et al., 1991	130	86
IRTA	Spain	1.2818	8.1	2012.4-9	long	CF	no	0	9.7973	26.1	Maris et al., 2016	111
IRTA	Spain	1.2818	8.1	2012.4-9	long	CF	no	0	23.0105	61.3	Maris et al., 2016	111
IRTA	Spain	1.2818	8.1	2012.4-9	long	CF	FYM	15.2	36.4865	97.2	Maris et al., 2016	111
IRTA	Spain	1.2818	8.1	2012.4-9	long	CF	FYM	28.7	10.3979	27.7	Maris et al., 2016	111
Villanueva de Sigena	Spain	0.5858	8.5	2012.5-10	long	CF	no	0	2.45726	6.9	Maris et al., 2016	117
Villanueva de Sigena	Spain	0.5858	8.5	2012.5-10	long	CF	no	0	8.72507	24.5	Maris et al., 2016	117
Villanueva de Sigena	Spain	0.5858	8.5	2012.5-10	long	CF	FYM	30	5.92984	16.651	Maris et al., 2016	117
Villanueva de Sigena	Spain	0.5858	8.5	2012.5-10	long	CF	FYM	51	7.72792	21.7	Maris et al., 2016	117
Cuttack	India	0.57	6.4	1996 wet (6-10)	Unknown	RFW	no	0	103.423	347.5	Rath et al., 1999	140
Cuttack	India	0.57	6.4	1996 wet (6-10)	Unknown	RFW	no	0	91.5179	307.5	Rath et al., 1999	140
Cuttack	India	0.57	6.4	1996 wet (6-10)	Unknown	RFW	no	0	75.8929	255	Rath et al., 1999	140
Cuttack	India	0.57	6.4	1996 wet (6-10)	Unknown	RFW	no	0	87.7976	295	Rath et al., 1999	140
Cuttack	India	0.51	7.63	1996 wet (6-10)	Unknown	CF	no	0	13.4722	38.8	Rath et al., 1999	120
Cuttack	India	0.51	7.63	1996 wet (6-10)	Unknown	CF	no	0	25.625	73.8	Rath et al., 1999	120
Shenyang	China	1.2296	6.55	May-Oct	Unknown	CF	no	0	0.45	1.4256	Yu et al., 2004	132
Shenyang	China	1.2296	6.55	May-Oct	Unknown	CF	FYM	30	1.05	3.3264	Yu et al., 2004	132
Yanting	China	0.86	8.3	June-Sept.	long	SD	no	0	10.1259	36.4533	Zhou et al., 2015	150
Yanting	China	0.86	8.3	June-Sept.	long	SD	no	0	8.77778	31.6	Zhou et al., 2015	150
Yanting	China	0.86	8.3	June-Sept.	long	SD	no	0	8.43704	30.3733	Zhou et al., 2015	150
Fangxian	China	1.19	6	2012-2014	long	SD	no	0	3.00827	10.18	Yao et al., 2017	141
Fangxian	China	1.19	6	2012-2014	long	SD	no	0	3.31363	11.2133	Yao et al., 2017	141
Wuxi	China	1.4964	6.8	2001.6-2001.10	long	SD	straw_on_season	3.82	18.5648	53.4667	Zheng et al., 2006	128	120
Wuxi	China	1.4964	6.8	2001.6-2001.10	long	SD	straw_on_season	3.82	7.36111	21.2	Zheng et al., 2006	128	120
Wuxi	China	1.4964	6.8	2002.6-2002.10	long	SD	straw_on_season	2.45714	2.36111	6.8	Zheng et al., 2006	128	120
Wuxi	China	1.4964	6.8	2002.6-2002.10	long	SD	straw_on_season	2.04308	2.73148	7.86667	Zheng et al., 2006	128	120
Wuxi	China	1.4964	6.8	2003.6-2003.10	long	SD	straw_on_season	2.45714	4.81481	13.8667	Zheng et al., 2006	128	120
Wuxi	China	1.4964	6.8	2003.6-2003.10	long	SD	straw_on_season	2.04308	5.37037	15.4667	Zheng et al., 2006	128	120
Wuxi	China	1.4964	6.8	2003.6-2003.10	long	SD	straw_on_season	4.55385	12.4537	35.8667	Zheng et al., 2006	128	120
Wuxi	China	1.4964	6.8	2003.6-2003.10	long	SD	no	0	2.12963	6.13333	Zheng et al., 2006	128	120
Yamagata	Japan	2.9	5.5	2008-2009	long	SD	straw_off_season	5	11.7991	37.0964	Itoh et al., 2011	131
Yamagata	Japan	2.18	5.79	2008-2009	long	SD	straw_off_season	6.4	13.8825	42.3138	Itoh et al., 2011	127
Fukushima	Japan	1.42	5.9	2008-2009	long	SD	straw_off_season	6	13.8855	48.6548	Itoh et al., 2011	146
Niigata	Japan	2.07	5.33	2008-2009	long	SD	straw_off_season	6	3.63738	11.174	Itoh et al., 2011	128
Niigata	Japan	2.07	5.33	2008-2009	long	CF	straw_off_season	6	10.2301	31.4269	Itoh et al., 2011	128
Gifu	Japan	1.46	6.41	2008-2009	long	SD	straw_off_season	6	2.14449	6.27906	Itoh et al., 2011	122
Aichi	Japan	1.19	5.24	2008-2009	long	SD	straw_off_season	6	22.4995	65.8785	Itoh et al., 2011	122
Aichi	Japan	1.19	5.24	2008-2009	long	CF	straw_off_season	6	29.1084	85.2295	Itoh et al., 2011	122
Tokushima	Japan	1.37	7.6	2008	long	SD	straw_off_season	7	20.1914	53.79	Itoh et al., 2011	111
Tokushima	Japan	1.37	7.6	2009	long	SD	straw_off_season	6	2.6464	7.05	Itoh et al., 2011	111
Kumamoto	Japan	7.45	6.6	2008	long	SD	straw_off_season	10	1.46949	3.95	Itoh et al., 2011	112
Kumamoto	Japan	7.45	6.6	2008	long	CF	straw_off_season	10	2.65253	7.13	Itoh et al., 2011	112
Kumamoto	Japan	7.45	6.6	2009	long	SD	no	0	2.20798	6.2	Itoh et al., 2011	117
Kumamoto	Japan	7.45	6.6	2009	long	CF	no	0	2.0584	5.78	Itoh et al., 2011	117
Kagoshima	Japan	1.35	6.7	2008-2009	long	SD	no	0	9.34633	24.45	Itoh et al., 2011	109
Kagoshima	Japan	1.35	6.7	2008	long	CF	no	0	10.3791	27.4009	Itoh et al., 2011	110
Nanjing	China	1.31	6.6	2007.6-2007.10	long	CF	no	0	4.32719	12.67	Qin et al., 2010	122
Nanjing	China	1.31	6.6	2007.6-2007.10	long	SD	no	0	2.08333	6.1	Qin et al., 2010	122
Nanjing	China	1.31	6.6	2007.6-2007.10	long	MD	no	0	1.70423	4.99	Qin et al., 2010	122
Nanjing	China	1.53	6.5	2007.6-2007.10	long	CF	no	0	3.65625	10.53	Qin et al., 2010	120
Nanjing	China	1.53	6.5	2007.6-2007.10	long	SD	no	0	1.71528	4.94	Qin et al., 2010	120
Nanjing	China	1.53	6.5	2007.6-2007.10	long	MD	no	0	1.28125	3.69	Qin et al., 2010	120
Beijing	China	1.33	7	1990.6-1990.10	long	MD	FYM	7.5	45.7833	109.88	Wang et al., 1999	100
Beijing	China	1.33	7	1990.6-1990.10	long	MD	FYM	3.75	31.1833	74.84	Wang et al., 1999	100
Beijing	China	1.33	7	1990.6-1990.10	long	MD	no	0	16.7	40.08	Wang et al., 1999	100
Beijing	China	1.25	6.8	1991.6-1991.10	long	MD	FYM	7.5	16.7514	49.45	Wang et al., 1999	123
Beijing	China	1.25	6.8	1991.6-1991.10	long	MD	FYM	3.75	9.61382	28.38	Wang et al., 1999	123
Beijing	China	1.25	6.8	1991.6-1991.10	long	MD	no	0	5.72154	16.89	Wang et al., 1999	123
Beijing	China	0.99	6.99	1995.6-1995.10	long	MD	FYM	7.5	12.1443	35.85	Wang et al., 1999	123
Beijing	China	0.99	6.99	1995.6-1995.10	long	MD	no	0	0.907859	2.68	Wang et al., 1999	123
Beijing	China	1.33	7	1990.6-1990.10	long	CF	FYM	3.75	31.1833	74.84	Wang et al., 1999	100
Beijing	China	1.33	7	1990.6-1990.10	long	MD	FYM	3.75	12.9792	31.15	Wang et al., 1999	100
Beijing	China	0.99	6.99	1995.6-1995.10	long	CF	FYM	7.5	4.91531	14.51	Wang et al., 1999	123
Beijing	China	0.99	6.99	1995.6-1995.10	long	MD	FYM	7.5	3.6687	10.83	Wang et al., 1999	123
Hailun	China	2.7956	7	2001.5-2001.9	long	CF	no	0	0.83	2.49	Yue et al., 2005	125
Hailun	China	2.7956	7	2001.5-2001.9	long	MD	no	0	0.56	1.68	Yue et al., 2005	125

## Sheet: references
REFRENCES
Abao EB, Bronson KF, Wassmann R, Singh U (2000) Simultaneous records of methane and nitrous oxide emissions in rice-based cropping systems under rainfed conditions. Nutrient Cycling in Agroecosystems, 58, 131–139.
Adhya TK, Bharati K, Mohanty SR, Ramakrishnan B, Rao VR, Sethunathan N, Wassmann R (2000a) Methane emission from rice fields at Cuttack, India. Nutrient Cycling in Agroecosystems, 58, 95-105.
Adhya TK, Mishra SR, Rath AK, Bharati K, Mohanty SR, Ramakrishnan B, Rao VR, Sethunathan N (2000b) Methane efflux from rice-based cropping systems under humid tropical conditions of eastern India. Agriculture, Ecosystems and Environment, 79, 85-90.
Adhya TK, Pattnaik P, Satpathy SN, Kumaraswamy S, Sethunathan N (1998) Influence of phosphorus application on methane emission and production in flooded paddy soils. Soil Biology and Biochemistry, 30, 177-181.
Adhya Tk, Rath AK, Gupta PK, Rao VR, Das SN, Parida KM, Parashar DC, Sethunathan N (1994) Methane emission from flooded rice fields under irrigated conditions. Biology and Fertility of Soils, 8, 245-248.
Adviento-borbe MA, Pittelkow CM, Anders M et al. (2014) Optimal Fertilizer Nitrogen Rates and Yield-Scaled Global Warming Potential in Drill Seeded Rice. Journal of environmental quality, 42, 1623–1634.
Adviento-Borbe MAA, Linquist B (2016) Assessing fertilizer N placement on CH4 and N2O emissions in irrigated rice systems. Geoderma, 266, 40–45.
Ali MA, Oh JH, Kim PJ (2008) Evaluation of silicate iron slag amendment on reducing methane emission from flood water rice farming. Agriculture, Ecosystems and Environment, 128, 21–26.
Ali MA, Sattar MA, Islam MN, Inubushi K (2014) Integrated effects of organic, inorganic and biological amendments on methane emission, soil quality and rice productivity in irrigated paddy ecosystem of Bangladesh: Field study of two consecutive rice growing seasons. Plant and Soil, 378, 239–252.
Barman D, Medhi DN, and Medhi BD (2000) Effect of intergrated nutrient management on methane emission from low land rice field. Journal Agricultural Science Society of NE Indina, 13, 237-239.
Bayer C, Costa F de S, Pedroso GM et al. (2014) Yield-scaled greenhouse gas emissions from flood irrigated rice under long-term conventional tillage and no-till systems in a Humid Subtropical climate. Field Crops Research, 162, 60–69.
Bayer C, Zschornack T, Pedroso GM et al. (2015) A seven-year study on the effects of fall soil tillage on yield-scaled greenhouse gas emission from flood irrigated rice in a humid subtropical climate. Soil and Tillage Research, 145, 118–125.
Bharati K, Mohanty SR, Singh DP, Rao VR, Adhya TK (2000) Influence of incorporation of dual cropping of Azolla on methane emission from a flooded alluvial soil planted to rice in eastern India. Agriculture, Ecosystems and Environment. 79, 73-83.
Bhatia A, Ghosh A, Kumar V, Tomer R, Singh SD, Pathak H (2011) Effect of elevated tropospheric ozone on methane and nitrous oxide emission from rice soil in north India. Agriculture, Ecosystems and Environment, 144, 21–28.
Bhattacharyya P, Roy KS, Neogi S, Adhya TK, Rao KS, Manna MC (2012) Effects of rice straw and nitrogen fertilization on greenhouse gas emissions and carbon storage in tropical flooded soil planted with rice. Soil and Tillage Research, 124, 119–130.
Bossio DA, Horwath WR, Mutters RG, Van Kessel C (1999) Methane pool and flux dynamics in a rice field following straw incorporation. Soil Biology and Biochemistry, 31, 1313–1322.
Bronson KF, Neue HU, Singh U, and Abao EB Jr. (1997) Automated chamber measurements of methane and nitrous oxide flux in a flooded rice soil: I. Residue, nitrogen and water management. Soil Science Society of America Journal, 61, 981-987.
Brye K, Rogers C, Smartt A, Norman R (2013) Soil Texture Effects on Methane Emissions From Direct-Seeded, Delayed-Flood Rice Production in Arkansas. Soil sci, 178, 519–529.
Butterbach-Bahl K, Papen H, Rennenberg H (1997) Impact of gas transport through rice cultivars on methane emission from rice paddy fields. Plant, Cell and Environment, 20, 1175–1183.
Cai ZC, Tsuruta H & Minami K (2000) Methane emission from rice fields in China: Measurements and influencing factors. Journal of Geophysical Research, 105(D13), 17231-17242.
Cai, Z, Tsuruta H, Gao M, Xu H & Wei C (2003) Options for mitigating methane emission from a permanently flooded rice field. Global Change Biology 9 (1), 37-45.
Cao, J., and Y. Hong, Methane emission flux from rice field in suburban of Guiyang, Chinese Journal of Soil Science, 27, 19-22, 1996 (in Chinese).
Chareonsilp N, Buddhaboon C, Promnart P, Wassmann R, Lantin RS (2000) Methane emission from deepwater rice fields in Thailand. Nutrient Cycling in Agroecosystems, 58, 121-130.
Chen R, Lin X, Wang Y, Hu J (2011) Mitigating methane emissions from irrigated paddy fields by application of aerobically composted livestock manures in eastern China. Soil Use and Management, 27, 103–109.
Chen W, Lu W, Duan B (2002) Effect of rice straw manure on methane emission in late-rice paddy fields. Acta Pedologica Sinica, 39, 170-176 (in Chinese)
Chen W, Wang Y, Zhao Z, Cui F, Gu J, Zheng X (2013) The effect of planting density on carbon dioxide, methane and nitrous oxide emissions from a cold paddy field in the Sanjiang Plain, northeast China. Agriculture, Ecosystems and Environment, 178, 64–70.
Chen, G, Huang G, Huang B, Wu J, Yu K, Xu H, Xie H, and Wang Z (1995) CH4 and N2O emission from a rice field and effect of Azolla and fertilization on them, Chinese J. Appl. Ecol., 6, 378-382.
Corton TM, Bajita JB, Grospe FS, Pamplona RR, Assis Jr. CA, Wassmann R, Lantin RS, Buendia LB (2000) Methane emission from irrigated and intensively managed rice fields in Central Luzon (Philippines). Nutrient Cycling in Agroecosystems, 58, 37-53.
Das S, Adhya TK (2014) Effect of combine application of organic manure and inorganic fertilizer on methane and nitrous oxide emissions from a tropical flooded soil planted to rice. Geoderma, 213, 185–192.
Datta A, Yeluripati JB, Nayak DR, Mahata KR, Santra SC, Adhya TK (2013) Seasonal variation of methane flux from coastal saline rice field with the application of different organic manures. Atmospheric Environment, 66, 114–122.
Debnath G, Jain MC, Kumar S, Sarkar K, Sinha SK (1996) Methane emissions from rice fields amended with biogas slurry and farm yard manure. Climatic Change, 33, 97-109.
Denier van der Gong HAC, Neue HU (1994) Impact of gypsum application on the methen emission from a wetland rice field. Global Biogeochemical Cycles, 8, 127-134.
Denier van der Gong HAC, Neue HU (1995) Influence of organic matter incorporation on the methane emission from a wetland rice field. Global Biogeochemical Cycles, 9, 11-22.
Duan B., Lu W, Chen W, Lu Y, Guo W, Wassmann R, and Lantin RS (1999) Impact of planted hybrid rice on methane emission and the methanogens of paddy soil, Agro-environmental Protection., 18, 203-208 (in Chinese).
Fan X, Yu H, Wu Q, Ma J, Xu H, Yang J, Zhuang Y (2016) Effects of fertilization on microbial abundance and emissions of greenhouse gases (CH4 and N2O) in rice paddy fields. Ecology and Evolution, 6, 1054–1063.
Fitzgerald GJ, Scow KM, Hill JE (2000) Fallow season straw and water management effects on methane emissions in California rice. Global Biogeochemical Cycles, 14, 767–776.
Ghosh S, Majumdar D, and Jain MC (2003) Methane and nitrous oxide emissions from an irrigated rice of North India. Chemosphere, 51, 181-195.
Goto E, Miyamori Y, Hasegawa S, and Inatsu O (2004) Reduction effects of accelerating rice straw decomposition and water management on methane emission from paddy fields in a cold district. Japanese Journal of Soil Science and Plant Nutrition, 75, 191-201.
Gupta DK, Bhatia A, Kumar A et al. (2016) Mitigation of greenhouse gas emission from rice-wheat system of the Indo-Gangetic plains: Through tillage, irrigation and fertilizer management. Agriculture, Ecosystems and Environment, 230, 1–9.
Gupta M, Verma SD, Parashar DC, Gupta P (1994) Temporal variation of methane emission from paddy fields of Gujarat. Indian Journal of Radio & Space Physics, 23, 265-268.
Haque MM, Biswas JC, Kim SY, Kim PJ (2016) Suppressing methane emission and global warming potential from rice fields through intermittent drainage and green biomass amendment. Soil Use and Management, 32, 72–79.
Haque MM, Kim SY, Ali MA, Kim PJ (2015) Contribution of greenhouse gas emissions during cropping and fallow seasons on total global warming potential in mono-rice paddy soils. Plant and Soil, 387, 251–264.
Haque MM, Kim SY, Pramanik P, Kim GY, Kim PJ (2013) Optimum application level of winter cover crop biomass as green manure under considering methane emission and rice productivity in paddy soil. Biology and Fertility of Soils, 49, 487–493.
Holzapfel-Pschorn A, Seiler W (1986) Methane emission during a cultivation period from an Italian rice paddy. Journal of Geophysical Research: Atmospheres, 91, 11803–11814.
Hu N, Wang B, Gu Z et al. (2016) Effects of different straw returning modes on greenhouse gas emissions and crop yields in a rice-wheat rotation system. Agriculture, Ecosystems and Environment, 223, 115–122.
Huang HY, Cao JL, Wu HS et al. (2014) Elevated methane emissions from a paddy field in southeast China occur after applying anaerobic digestion slurry. GCB Bioenergy, 6, 465–472.
Inubushi K, Cheng W, Aonuma S, Hoque M.M., Kobayashi K, Miura Shu, Kim HY & Okada M (2003) Effects of free-air CO2 enrichment (FACE) on CH4 emission from a rice paddy field. Global Change Biology 9 (10), 1458-1464.
Itoh M, Sudo S, Mori S et al. (2011) Mitigation of methane emissions from paddy fields by prolonging midseason drainage. Agriculture, Ecosystems and Environment, 141, 359–372.
Jain MC, Kumar S, Wassmann R, Mitra S, Singh SD, Singh JP, Singh R, Yadav AK, Gupta S (2000) Methane emissions from irrigated rice fields in Northern India (New Delhi). Nutrient Cycling in Agroecosystems, 58, 75-83.
Jain N, Dubey R, Dubey DS, Singh J, Khanna M, Pathak H, Bhatia A (2014) Mitigation of greenhouse gas emission with system of rice intensification in the Indo-Gangetic Plains. Paddy and Water Environment, 12, 355–363.
Jermsawatdipong P, Murase J, Prabuddham P, Hasathon Y, Khomthong N, Naklang K, Watanae A, Haraguchi H, Kumura M (1994) Methane emission from plots with differences in fertilizer application in Thai paddy fields. Soil Science and Plant Nutrition, 40, 63-71.
Jiang C, Wang Y, Zheng X, Zhu B, Huang Y, Hao Q (2006) Methane and nitrous oxide emissions from three paddy rice based cultivation systems in Southwest China. Advances in Atmospheric Sciences, 23, 415–424.
Jiao Z, Hou A, Shi Y, Huang G, Wang Y, Chen X (2006) Water Management Influencing Methane and Nitrous Oxide Emissions from Rice Field in Relation to Soil Redox and Microbial Community. Communications in Soil Science and Plant Analysis, 37, 1889–1903.
Jørgensen SE, Bendoricchio G (2001) Fundamentals of ecological modelling, Vol. 21. Elsevier.
Kaewpradit W, Toomsan B, Vityakon P et al. (2008) Regulating mineral N release and greenhouse gas emissions by mixing groundnut residues and rice straw under field conditions. European Journal of Soil Science, 59, 640–652.
Kantachote D, Nunkaew T, Kantha T, Chaiprapat S (2016) Biofertilizers from Rhodopseudomonas palustris strains to enhance rice yields and reduce methane emissions. Applied Soil Ecology, 100, 154–161.
Khalil, M. A. K., R. A. Rasmussen, M. J. Shearer, R. W. Dalluge, L. Ren, and C. Duan, Measurements of methane emissions from rice fields in China, J. Geophys. Res., 103(D19), 25181-25210, 1998.
Khosa MK, Sidhu BS, Benbi DK (2010) Effect of organic materials and rice cultivars on methane emission from rice field. Journal of Environmental Biology, 31, 281–285.
Kim G-Y, Gutierrez J, Jeong H-C, Lee J-S, Haque MDM, Kim PJ (2014a) Effect of intermittent drainage on methane and nitrous oxide emissions under different fertilization in a temperate paddy soil during rice cultivation. Journal of the Korean Society for Applied Biological Chemistry, 57, 229–236.
Kim SY, Gutierrez J, Kim PJ (2012) Considering winter cover crop selection as green manure to control methane emission during rice cultivation in paddy soil. Agriculture, Ecosystems and Environment, 161, 130–136.
Kim SY, Gutierrez J, Kim PJ (2016) Unexpected stimulation of CH4 emissions under continuous no-tillage system in mono-rice paddy soils during cultivation. Geoderma, 267, 34–40.
Kim SY, Pramanik P, Gutierrez J, Hwang HY, Kim PJ (2014b) Comparison of methane emission characteristics in air-dried and composted cattle manure amended paddy soil during rice cultivation. Agriculture, Ecosystems and Environment, 197, 60–67.
Kongchum M, Bollich PK, Hudnall WH, DeLaune RD, Lindau CW (2006) Decreasing methane emission of rice by better crop management. Agronomy for Sustainable Development, 26, 45–54.
Kreye C, Dittert K, Zheng X, Zhang X, Lin S, Tao H, Sattelmacher B (2007) Fluxes of methane and nitrous oxide in water-saving rice production in north China. Nutrient Cycling in Agroecosystems, 77, 293–304.
Kumagai k, Konno Y (1998) Methane emission form rice paddy fields after upland farming. Japanese Journal of Soil Science and Plant Nutrition, 69, 333-339 (in Japanese).
Kumagai K, Konno Y and Togashi M (2000) Effect of water management and rice plant growth on methane emission from rice paddy fields in a cold district of Japan. Japanese Journal of Soil Science and Plant Nutrition, 71, 643-650.
Lagomarsino A, Agnelli AE, Linquist B et al. (2016) Alternate Wetting and Drying of Rice Reduced CH4 Emissions but Triggered N2O Peaks in a Clayey Soil of Central Italy. Pedosphere, 26, 533–548.
LaHue GT, Chaney RL, Adviento-Borbe MA, Linquist BA (2016) Alternate wetting and drying in high yielding direct-seeded rice systems accomplishes multiple environmental and agronomic objectives. Agriculture, Ecosystems and Environment, 229, 30–39.
Lauren JG, Pettygrove GS, Duxbury JM (1994) Methane emissions associated with a green manure amendment to flooded rice in California. Biogeochemistry, 24, 53–65.
Lee CH, Kim SY, Villamil MB, Pramanik P, Hong CO, Kim PJ (2012) Different response of silicate fertilizer having electron acceptors on methane emission in rice paddy soil under green manuring. Biology and Fertility of Soils, 48, 435–442.
Lee CH, Park K Do, Jung KY, Ali MA, Lee D, Gutierrez J, Kim PJ (2010) Effect of Chinese milk vetch (Astragalus sinicus L.) as a green manure on rice productivity and methane emission in paddy soil. Agriculture, Ecosystems and Environment, 138, 343–347.
Lee KB, Lee DB, Kim JG, Kim YW (1997a) Effect of rice cultural patterns on methane emission from a Korean paddy soil. Journal of Korean Society of Soil Science and Fertilizer, 30, 35-40 (in Korean).
Lee KB, Lee DB, Kim JG, Lee SB, Kim JD, Han SS (2000) Effects of application of nitrogen fertilizers on methane emission in a paddy soil. Journal of Korean Society of Soil Science and Fertilizer, 33, 212-219 (in Korean).
Lee KB, Lee DB, Lee SB, Kim JG, Kim YW (1999) Methane emission among rice ecotypes in Korean paddy soil. Korean Journal of Environmental Agriculture, 18, 1-5 (in Korean).
Li X, Ma J, Yao Y, Liang S, Zhang G, Xu H, Yagi K (2014) Methane and nitrous oxide emissions from irrigated lowland rice paddies after wheat straw application and midseason aeration. Nutrient Cycling in Agroecosystems, 100, 65–76.
Liang XQ, Li H, Wang SX et al. (2013) Nitrogen management to reduce yield-scaled global warming potential in rice. Field Crops Research, 146, 66–74.
Lin, K., Xiang Y, Jiang D, Hu Q, Li Z, Du D, and Tao Z (2000) Methane emission flux from paddy fields in its control in Hubei, Agro-environment Protection., 19, 257-270 (in Chinese).
Lindau CW (1994) Methane emissions from Louisiana rice fields amended with nitrogen fertilizers. Soil Biology and Biochemistry, 26, 353–359.
Lindau CW, Bollich PK, Delaune RD, Patrick WH, Law VJ (1991) Effect of urea fertilizer and environmental factors on CH4 emissions from a Louisiana, USA rice field. Plant and Soil, 136, 195–203.
Liou RM, Huang SN, Lin CW (2003) Methane emission from fields with differences in nitrogen fertilizers and rice varieties in Taiwan paddy soils. Chemosphere, 50, 237–246.
Liou RM, Huang SN, Lin CW, and Chen SH (2003) Methane emission from fields with three various rice straw treatments in Taiwan paddy soils. Journal of Environmental Science and Health, B38, 511-527.
Liu G, Yu H, Ma J, Xu H, Wu Q, Yang J, Zhuang Y (2015) Effects of straw incorporation along with microbial inoculant on methane and nitrous oxide emissions from rice fields. Science of the Total Environment, 518–519, 209–216.
Liu W, Hussain S, Wu L et al. (2016) Greenhouse gas emissions, soil quality, and crop productivity from a mono-rice cultivation system as influenced by fallow season straw management. Environmental Science and Pollution Research, 23, 315–328.
Lu, W., Chen W, Duan B, Guo W, Lu Y, Lantin RS, Wassmann R, and Neue HU (2000) Methane emissions and mitigation options in irrigated rice fields in southeast China, Nutrient Cycling Agroecosystems, 58, 65-73.
Lumbanraja J, Nugroho SG, Niswati A, Ardjasa WS, Subadiyasa N, Arya N, Haraguchi H, Kimura M (1998) Methane emission form Indonesian rice fields with special references to the effects of yearly and seasonal variations, rice variety, soil type and water management. Hydrological Processes, 12, 2057-2072.
Lumbanraja J, Nugroho SG, Suprapto H, Sunyoto, Ardjasa WS, Kimura M (1997) Methane emission from an Indonesian rainfed paddy field. Soil Science and Plant Nutrition, 43, 479-482.
Ly P, Jensen LS, Bruun TB, de Neergaard A (2013) Methane (CH4) and nitrous oxide (N2O) emissions from the system of rice intensification (SRI) under a rain-fed lowland rice ecosystem in Cambodia. Nutrient Cycling in Agroecosystems, 97, 13–27.
Ma J, Li XL, Xu H, Han Y, Cai ZC, Yagi K (2007) Effects of nitrogen fertiliser and wheat straw application on CH 4 and N2O emissions from a paddy rice field. Australian Journal of Soil Research, 45, 359–367.
Ma J, Xu H, Yagi K, Cai Z (2008) Methane emission from paddy soils as affected by wheat straw returning mode. Plant and Soil, 313, 167–174.
Maris SC, Teira-Esmatges MR, Bosch-Serra AD, Moreno-García B, Català MM (2016) Effect of fertilising with pig slurry and chicken manure on GHG emissions from Mediterranean paddies. Science of The Total Environment, 569–570, 306–320.
Matsumoto J, Minamiyama Y, Akahori S, and Takahashi K (2002) Suppression of methane emission from paddy field supplemented with organic matter. Japanese Journal of Soil Science and Plant Nutrition, 73, 315-318.
Minamikawa K, Sakai N (2006) The practical use of water management based on soil redox potential for decreasing methane emission from a paddy field in Japan. Agriculture, Ecosystems and Environment, 116, 181–188.
Minamikawa K, Sakai N, Hayashi H (2005) The effects of ammonium sulfate application on methane emission and soil carbon content of a paddy field in Japan. Agriculture, Ecosystems and Environment, 107, 371–379.
Mitra S, Jian MC, Kumar S, Bandyopahyay SK, Kalra N (1999) Effect of rice cultivars on methane emission. Agriculture, ecosystems and Environment, 73, 177-183.
Mohanty SR, Bharati K, Moorthy BTS, Ramakrishnan B, Rao VR, Sethunathan N, Adhy TK (2001) Effect of the herbicide butachlor on methane emission and ebullition flux from a direct-seeded flooded rice field. Biology and Fertility of Soils, 33, 175-180.
Morimura, T., H. Narioka, S. Aso, H. Takanaga and M. Yoshiba (1995) Methane Production and Soil Physical Properties of Direct Seeding of Paddy Rice on Submerged Paddy Fields. Japanese Journal of Soil Science and Plant Nutrition, 66, 632-638.
Naser HM, Nagata O, Tamura S, Hatano R (2007) Methane emissions from five paddy fields with different amounts of rice straw application in central Hokkaido, Japan. Soil Science and Plant Nutrition, 53, 95–101.
Nugroho SG, Lumbanraja J, Suprapto H, Sunyoto, Ardjasa WS, Haraguchi H, Kimura M (1994a) Methane emission from an Indonesian paddy field subjected to several fertilizer treatments. Soil Science and Plant Nutrition, 40, 275-281.
Nugroho SG, Lumbanraja J, Suprapto H, Sunyoto, Ardjasa WS, Haraguchi H, Kimura M (1994b) Effect of intermittent irrigation on methane emission from an Indonesian paddy field. Soil Science and Plant Nutrition, 40, 609-615.
Nugroho SG, Lumbanraja J, Suprapto H, Sunyoto, Ardjasa WS, Haraguchi H, Kimura M (1996) Three-year measurement of methane emission form an Indonesian paddy field. Plant and Soil, 181, 287-293.
Nugroho SG, Sunyoto, Lumbanraja J, Suprapto H, Ardjasa WS, Kimura M (1997) Effect of rice variety on methane emission from an Indonesian paddy field. Soil Science and Plant Nutrition, 43, 799-809.
Pandey A, Mai VT, Vu DQ, Bui TPL, Mai TLA, Jensen LS, de Neergaard A (2014) Organic matter and water management strategies to reduce methane and nitrous oxide emissions from rice paddies in Vietnam. Agriculture, Ecosystems and Environment, 196, 137–146.
Pathak H, Prasad S, Bhatia A, Singh S, Kumar S, Singh J, Jain MC (2003) Methane emission from rice-wheat cropping system in the Indo-Gangetic plain in relation to irrigation, farmyard manure and dicyandiamide application. Agriculture, Ecosystems and Environment, 97, 309–316.
Pathak H, Prasad S, Bhatia A, Singh S, Kumar S, Singh J, Jain MC (2003) Methane emission from rice-wheat cropping system in the Indo-Gangetic plain in relation to irrigation, farmyard manure and diyandiamide application. Agriculture, Ecosystems and Environment, 97, 309-316.
Pittelkow CM, Adviento-Borbe MA, Hill JE, Six J, van Kessel C, Linquist BA (2013) Yield-scaled global warming potential of annual nitrous oxide and methane emissions from continuously flooded rice in response to nitrogen input. Agriculture, Ecosystems and Environment, 177, 10–20.
Pramanik P, Kim PJ (2014) Evaluating changes in cellulolytic bacterial population to explain methane emissions from air-dried and composted manure treated rice paddy soils. Science of the Total Environment, 470–471, 1307–1312.
Rath AK, Swain B, Ramakrishnan B, Panda D, Adhya TK, Rao VR, Sethunathan N (1999) Influence of fertilizer management and water regime on methane emission from rice fields. Agriculture, ecosystems & environment, 76, 99–107.
Sander BO, Samson M, Buresh RJ (2014) Methane and nitrous oxide emissions from flooded rice fields as affected by water and straw management between rice crops. Geoderma, 235–236, 355–362.
Sapkota TB, Jat ML, Shankar V, Singh LK, Rai M, Grewal MS, Stirling CM (2015) Tillage, residue and nitrogen management effects on methane and nitrous oxide emission from rice–wheat system of Indian Northwest Indo-Gangetic Plains. Journal of IntegratIve envIronmental ScIenceS.
Sass RL, Fisher FM, Harcombe PA, Turner FT (1990) Methane production and emission in a Texas rice field. Global Biogeochemical Cycles, 4, 47–68.
Sass RL, Fisher FM, Lewis ST, Jund MF, Turner FT (1994) Methane emissions from rice fields: Effect of soil properties. Global Biogeochemical Cycles, 8, 135–140.
Sass RL, Fisher FM, Turner FT, Jund MF (1991) Methane emission from rice fields as influenced by solar radiation, temperature, and straw incorporation. Global Biogeochemical Cycles, 5, 335–350.
Sass RL, Fisher FM, Wang YB, Turner FT, Jund MF (1992) Methane emission from rice fields: The effect of floodwater management. Global Biogeochemical Cycles, 6, 249–262.
Satpathy SN, Mishra S, Adhya TK, Ramakrishnan B, Rao VR, Sethunathan N (1998) Cultivar variation in methane efflux from tropical rice. Plant and Soil, 202, 223-229.
Schütz H, Holzapfel-Pschorn A, Conrad R, Rennenberg H, Seiler W (1989) A 3-year continuous record on the influence of daytime, season, and fertilizer treatment on methane emission rates from an Italian rice paddy. Journal of Geophysical Research, 94, 16405.
Setyanto p, Makarim AK, Fagi AM, Wassmann R, Buendia LV (2000) Crop management affecting methane emissions from irrigated and rainfed rice in Central Java (Indonesia). Nutrient Cycling in Agroecosystems, 58, 85-93.
Shang Q, Yang X, Gao C et al. (2011) Net annual global warming potential and greenhouse gas intensity in Chinese double rice-cropping systems: A 3-year field measurement in long-term fertilizer experiments. Global Change Biology, 17, 2196–2210.
Shen J, Tang H, Liu J et al. (2014) Contrasting effects of straw and straw-derived biochar amendments on greenhouse gas emissions within double rice cropping systems. Agriculture, Ecosystems and Environment, 188, 264–274.
Shin YK, Yun SH (2000) Varietal Differences in methane emission from Korean rice cultivars. Nutrient Cycling in Agroecosystems, 58, 315-319.
Simmonds MB, Anders M, Adviento-Borbe MA, van Kessel C, McClung A, Linquist BA (2015) Seasonal methane and nitrous oxide emissions of several rice cultivars in direct-seeded systems. J Environ Qual, 44, 103–114.
Singh JS, Singh S, Raghubanshi AS, Singh S, Kashyap AK (1996) Methane flux from rice/wheat agroecosystem as affected by crop phenology, fertilization and water level. Plant and Soil, 183, 323-327.
Singh S, Singh JS, Kashyap AK (1999) Methane flux from irrigated rice fields in relation to crop growth and NB-fertilization. Soil Biology and Biochemistry, 31, 1219-1228.
Singh SK, Bharadwaj V, Thakur TC, Pachauri SP, Singh PP, Mishra AK (2009) Influence of crop establishment methods on methane emission from rice fields. Current Science, 97, 84–89.
Speed FM, Hocking RR, Hackney O (1978) Methods of analysis of linear models with unbalanced data. Journal of the American Statistical Association, 73, 105–112.
Subadiyasa N, Arya N, Kimura M (1997) Methane emissions from paddy fields in Bali Island, Indonesia. Soil Science and Plant Nutrition, 43, 387-394.
Tang H, Xiao X, Tang W, Wang K, Sun J, Li W, Yang G (2015) Effects of winter covering crop residue incorporation on CH4 and N2O emission from double-cropped paddy fields in southern China. Environmental Science and Pollution Research, 22, 12689–12698.
Tang HM, Xiao XP, Tang WG, Wang K, Sun JM, Li WY, Yang GL (2014) Effects of winter cover crops straws incorporation on CH4 and N2O emission from double-cropping paddy fields in southern China. PLoS ONE, 9.
Tao, Z. (1998) Methane emission from rice fields in difference regions of China and mitigation options, Agro-environ. Protec., 17, 1-7 (in Chinese).
Tarlera S, Capurro MC, Irisarri P, Scavino AF, Cantou G, Roel A (2016) Yield-scaled global warming potential of two irrigation management systems in a highly productive rice system. Scientia Agricola, 73, 43–50.
Toma Y, Oomori S, Maruyama A, Ueno H, Nagata O (2016) Effect of the number of tillages in fallow season and fertilizer type on greenhouse gas emission from a rice (Oryza sativa L.) paddy field in Ehime, southwestern Japan. Soil Science and Plant Nutrition, 62, 69–79.
Vu QD, de Neergaard A, Tran TD, Hoang QQ, Ly P, Tran TM, Jensen LS (2015) Manure, biogas digestate and crop residue management affects methane gas emissions from rice paddy fields on Vietnamese smallholder livestock farms. Nutrient Cycling in Agroecosystems, 103, 329–346.
Wang B, Xu Y, Wang Z, Li Z, Guo Y, Shao K, Chen Z (1999) Methane emissions from ricefields as affected by organic amendment, water regime, crop establishment, and rice cultivar. Environmental Monitoring and Assessment, 57, 213–228.
Wang J, Chen Z, Ma Y, Sun L, Xiong Z, Huang Q, Sheng Q (2013) Methane and nitrous oxide emissions as affected by organic-inorganic mixed fertilizer from a rice paddy in southeast China. Journal of Soils and Sediments, 13, 1408–1417.
Wang J, Zhang X, Xiong Z, Khalil MAK, Zhao X, Xie Y, Xing G (2012) Methane emissions from a rice agroecosystem in South China: Effects of water regime, straw incorporation and nitrogen fertilizer. Nutrient Cycling in Agroecosystems, 93, 103–112.
Wang W, Sardans J, Lai DYF et al. (2015) Effects of steel slag application on greenhouse gas emissions and crop yield over multiple growing seasons in a subtropical paddy field in China. Field Crops Research, 171, 146–156.
Wang Z, Xu Y, Li Z, Guo Y, Wassmann R, Neue HU, Lantin RS, Buendia LV, Ding Y, and Wang Z (2000) A four-year record of methane emissions from irrigated rice fields in the Beijing region of China, Nutrient Cycling in Agroecosystems, 58, 55-63.
Wassmann R, Buendia LV, Lantin RS, Bueno CS, Lubigan LA, Umali A, Nocon NN, Javellana AM & Neue HU (2000) Mechanisms of crop management impact on methane emissions from rice fields in Los Banos, Philippines. Nutrient Cycling in Agroecosystems, 58, 107-119.
Wassmann R., Shangguan XJ, Tőlg M, Cheng D, Wang M, Papen H, Rennenberg H, and Seiler W (1996) Spatial and seasonal distribution of organic amendments affecting methane emission from Chinese rice fields, Biology and Fertility of Soils, 22, 191-195.
Wassmann, R., Wang M, Shangguan X, Xie X, Shen R, Wang R, Papen H, Rennenberg H, and Seiler W (1993) First records of a field experiment on fertilizer effects on methane emission from rice fields in Hunan-province, (PR China), Geophysical Research Letter., 20, 2071-2074.
Weller S, Kraus D, Ayag KRP, Wassmann R, Alberto MCR, Butterbach-Bahl K, Kiese R (2015) Methane and nitrous oxide emissions from rice and maize production in diversified rice cropping systems. Nutrient Cycling in Agroecosystems, 101, 37–53.
Wu J, Wang W, Wang X et al. (2015) Residue management affects greenhouse gas emissions and soil organic carbon in wheat- rice rotation system. Fresenius Environmental Bulletin, 24, 2751–2762.
Xia L, Xia Y, Li B, Wang J, Wang S, Zhou W, Yan X (2016a) Integrating agronomic practices to reduce greenhouse gas emissions while increasing the economic return in a rice-based cropping system. Agriculture, Ecosystems and Environment, 231, 24–33.
Xia L, Xia Y, Ma S, Wang J, Wang S, Zhou W, Yan X (2016b) Greenhouse gas emissions and reactive nitrogen releases from rice production with simultaneous incorporation of wheat straw and nitrogen fertilizer. Biogeosciences, 13, 4567–4579.
Xie B, Zhou Z, Mei B et al. (2012) Influences of free-air CO2 enrichment (FACE), nitrogen fertilizer and crop residue incorporation on CH4 emissions from irrigated rice fields. Nutrient Cycling in Agroecosystems, 93, 373–385.
Xu YC, Shen QR, Li ML, Dittert K, and Sattelmacher B (2004) Effect of soil water status and mulching on N2O and CH4 emission from lowland rice field in China. Biology and Fertility of Soils, 39, 215-217.
Yagi K & Minami K (1990) Effect of organic matter application on methane emission from some Japanese rice fields. Soil Science and Plant Nutrition, 36, 599-610.
Yagi K, Tsuruta H, Kanda K, Minami K (1996) Effect of water management on methane emission form a Japanese rice paddy field: Automated methane monitoring. Global Biogeochemical Cycles, 10, 255-267.
Yan M, Hua R, Wang D, Ma X (2000) Study on estimation of methane emission from rice fields in Changchun area, Scientia Geographica Sinica, 20, 386-390 (in Chinese).
Yang SS, Chang HL (2001) Methane emission from paddy fields in Taiwan. Biology and Fertility of Soils, 33, 157-165.
Yao Z, Du Y, Tao Y, Zheng X, Liu C, Lin S, Butterbach-Bahl K (2014) Water-saving ground cover rice production system reduces net greenhouse gas fluxes in an annual rice-based cropping system. Biogeosciences, 11, 6221–6236.
Yao Z, Zheng X, Liu C, Lin S, Zuo Q, Butterbach-Bahl K (2017) Improving rice production sustainability by reducing water demand and greenhouse gas emissions with biodegradable films. Scientific Reports, 7, 1–10.
Yao Z, Zheng X, Wang R et al. (2013a) Greenhouse gas fluxes and NO release from a Chinese subtropical rice-winter wheat rotation system under nitrogen fertilizer management. Journal of Geophysical Research: Biogeosciences, 118, 623–638.
Yao Z, Zheng X, Wang R, Xie B, Butterbach-Bahl K, Zhu J (2013b) Nitrous oxide and methane fluxes from a rice-wheat crop rotation under wheat residue incorporation and no-tillage practices. Atmospheric Environment, 79, 641–649.
Yu K, Chen G, Patrick WH (2004) Reduction of global warming potential contribution from a rice field by irrigation, organic matter, and fertilizer management. Global Biogeochemical Cycles, 18, 1–10.
Yue J, Shi Y, Liang W, Wu J, Wang C, Huang G (2005) Methane and nitrous oxide emissions from rice field and related microorganism in black soil, northeastern China. Nutrient Cycling in Agroecosystems, 73, 293–301.
Zhan M, Cao C, Wang J, Jiang Y, Cai M, Yue L, Shahrear A (2010) Dynamics of methane emission, active soil organic carbon and their relationships in wetland integrated rice-duck systems in Southern China. Nutrient Cycling in Agroecosystems, 89, 1–13.
Zhang G, Yu H, Fan X, Yang Y, Ma J, Xu H (2016b) Drainage and tillage practices in the winter fallow season mitigate CH4 and N2O emissions from a double-rice field in China. Atmospheric Chemistry and Physics, 16, 11853–11866.
Zhang GB, Ji Y, Ma J, Xu H, Cai ZC (2011) Case study on effects of water management and rice straw incorporation in rice fields on production, oxidation, and emission of methane during fallow and following rice seasons. Soil Research, 49, 238–246.
Zhang L, Zheng J, Chen L et al. (2015c) Integrative effects of soil tillage and straw management on crop yields and greenhouse gas emissions in a rice-wheat cropping system. European Journal of Agronomy, 63, 47–54.
Zhang Y, Sheng J, Wang Z, Chen L, Zheng J (2015b) Nitrous oxide and methane emissions from a chinese wheat-rice cropping system under different tillage practices during the wheat-growing season. Soil and Tillage Research, 146, 261–269.
Zhang ZS, Cao CG, Guo LJ, Li CF (2016a) Emissions of CH4 and CO2 from paddy fields as affected by tillage practices and crop residues in central China. Paddy and Water Environment, 14, 85–92.
Zhang ZS, Guo LJ, Liu TQ, Li CF, Cao CG (2015a) Effects of tillage practices and straw returning methods on greenhouse gas emissions and net ecosystem economic budget in rice-wheat cropping systems in central China. Atmospheric Environment, 122, 636–644.
Zhao Z, Yue Y, Sha Z et al. (2015) Assessing impacts of alternative fertilizer management practices on both nitrogen loading and greenhouse gas emissions in rice cultivation. Atmospheric Environment, 119, 393–401.
Zhen, X., Wang M, Wang Y, Shen R, Shangguan X, Kogge M, Heyer J, Papen H, Jing J, and Li L (1997) CH4 and N2O emissions from rice paddy fields in Southeast China, Scientia Atmospherica Sinica 21, 231-237 (in Chinese).
Zheng X, Zhou Z, Wang YY et al. (2006) Nitrogen-regulated effects of free-air CO2 enrichment on methane emissions from paddy rice fields. Global Change Biology, 12, 1717–1732.
Zhou M, Zhu B, Brüggemann N, Wang X, Zheng X, Butterbach-Bahl K (2015) Nitrous oxide and methane emissions from a subtropical rice-rapeseed rotation system in China: A 3-year field case study. Agriculture, Ecosystems and Environment, 212, 297–309.
Zou J, Huang Y, Jiang J, Zheng X, Sass RL (2005) A 3‐year field measurement of methane and nitrous oxide emissions from rice paddies in China: Effects of water regime, crop residue, and fertilizer application. Global Biogeochemical Cycles, 19.
Zou J, Liu S, Qin Y, Pan G, Zhu D (2009) Sewage irrigation increased methane and nitrous oxide emissions from rice paddies in southeast China. Agriculture, Ecosystems and Environment, 129, 516–522.
Zschornack T, da Rosa CM, Pedroso GM, Marcolin E, da Silva PRF, Bayer C (2016) Mitigation of yield-scaled greenhouse gas emissions in subtropical paddy rice under alternative irrigation systems. Nutrient Cycling in Agroecosystems, 105, 61–73.

## Sheet: note
Climate:	one of the seven agroecology zones according to IRRI, 2002.
Pre-season water status*:
	Flooded	Permanently flooded rice fields were assumed to have a preseason water regime of ‘flooded’. Late rice in China is usually planted immediately after early rice on the same field and was therefore regarded as having a preseason water regime of ‘flooded’.
	Long	If rice was planted once a year and the field was not flooded in the non-ricegrowing season, the preseason water regime was classified as long drainage.
	Short	Rice was planted more than once a year, but there was more than 1 month fallow time between the two seasons, short drainage was usually taken as preseason drainage.
	Two	For measurements conducted on rice fields that were preceded by two upland crops or an upland crop and a drained fallow season, the preseason water of such experiments was classified as double drainage.
	Unknown
Water regime
	CF	Continuous flooding	Treatment with one mid-season drainage and an end-season drainage was classified as single drainage, because in many experiments the so-called ‘continuous flooding’ treatment also included an end-season drainage.
	DW	Deepwater
	SD	Single drainage
	MD	Multiple drainage	The water regime was called ‘intermittent irrigation’ but the number of drainages was not clear, it was assumed to be multiple drainage.
	RFW	Rainfed, wet season
	RFD	Rainfed, dry season
	Unknown
Organic matter amendment
	Compost
	FYM	Farmyard manure
	GM	Green manure
	Straw_on_season*	Straw applied just before rice transplanting as on-season;Straw that was left on the soil surface in the fallow season and incorporated into the soil before the next rice transplanting was also categorized as onseason.
	Straw_off_season*	Straw incorporated into soils in the previous season (upland crop or fallow) was categorized as offseason
